# Supplementary material for: Transcriptional evidence for the "Reverse Warburg Effect" in human breast cancer tumor stroma and metastasis: Similarities with oxidative stress, inflammation, Alzheimer's disease, and "Neuron-Glia Metabolic Coupling"
Source: Aging (Albany NY). 2010 Mar 31;2(4):185–99. doi: 10.18632/aging.100134 (PMC2881509; doi:10.18632/aging.100134)
Supplement: Supplementary Table 1 [file aging-02-185-s001.xls]

## Sheet: Suppl Table 1.TumorStroma.xls
Gene	Description	p-value
Col11a1	collagen, type XI, alpha 1	1.51e-73
Mmp11	matrix metallopeptidase 11	1.34e-66
Gjb2	gap junction protein, beta 2	2.55e-57
Kif26b	kinesin family member 26B	9.92e-54
Col8a1	collagen, type VIII, alpha 1	1.11e-51
Wisp1	WNT1 inducible signaling pathway protein 1	1.87e-48
Cxcr4	chemokine (C-X-C motif) receptor 4	4.86e-43
Col10a1	collagen, type X, alpha 1	2.37e-42
Entpd7	ectonucleoside triphosphate diphosphohydrolase 7	4.96e-42
Comp	cartilage oligomeric matrix protein	1.67e-41
Havcr2	hepatitis A virus cellular receptor 2	1.43e-40
Acbd3	acyl-Coenzyme A binding domain containing 3	3.09e-40
Mical2	microtubule associated monoxygenase, calponin and LIM domain containing 2	3.22e-40
Clec7a	C-type lectin domain family 7, member a	2.97e-39
Bmp8a	bone morphogenetic protein 8a	5.5e-39
Snrpd3	small nuclear ribonucleoprotein D3	1.02e-38
Plau	plasminogen activator, urokinase	3.64e-38
Capg	capping protein (actin filament), gelsolin-like	4.18e-38
Slc7a6	solute carrier family 7 (cationic amino acid transporter, y+ system), member 6	4.4e-38
Tnfsf4	tumor necrosis factor (ligand) superfamily, member 4	1.25e-37
Tuft1	tuftelin 1	1.44e-37
Adam8	a disintegrin and metallopeptidase domain 8	3.65e-37
Alox5ap	arachidonate 5-lipoxygenase activating protein	7.91e-37
P4ha3	procollagen-proline, 2-oxoglutarate 4-dioxygenase (proline 4-hydroxylase), alpha polypeptide III	1.65e-36
Itga11	integrin alpha 11	3.47e-36
Ctsb	cathepsin B	4.11e-36
Zfyve1	zinc finger, FYVE domain containing 1	5.79e-36
Ifi30	interferon gamma inducible protein 30	6.24e-36
Sparc	secreted acidic cysteine rich glycoprotein	1.49e-35
Glis3	GLIS family zinc finger 3	3.13e-35
Corin	corin	4.58e-35
Vdr	vitamin D receptor	6.38e-35
Prss22	protease, serine, 22	2.28e-34
Cd86	CD86 antigen	2.63e-34
Hint3	histidine triad nucleotide binding protein 3	2.87e-34
Msr1	macrophage scavenger receptor 1	3.25e-34
Krt35	keratin 35	5.75e-34
Col12a1	collagen, type XII, alpha 1	6.4e-34
Ly86	lymphocyte antigen 86	7.28e-34
Upk1a	uroplakin 1A	9.78e-34
Pldn	pallidin	1.08e-33
Aebp1	AE binding protein 1	1.25e-33
Tnpo2	transportin 2 (importin 3, karyopherin beta 2b)	1.27e-33
Il4i1	interleukin 4 induced 1	1.56e-33
Sulf2	sulfatase 2	2.14e-33
Noxo1	NADPH oxidase organizer 1	2.21e-33
Cdh11	cadherin 11	2.5e-33
Fgd3	FYVE, RhoGEF and PH domain containing 3	2.52e-33
Rsad2	radical S-adenosyl methionine domain containing 2	4.84e-33
Manea	mannosidase, endo-alpha	6.94e-33
Col5a2	collagen, type V, alpha 2	7.78e-33
Coro2a	coronin, actin binding protein 2A	1.03e-32
Abo	ABO blood group (transferase A, alpha 1-3-N-acetylgalactosaminyltransferase, transferase B, alpha 1-3-galactosyltransferase)	1.1e-32
Tmem125	transmembrane protein 125	1.79e-32
Tlr4	toll-like receptor 4	1.89e-32
Ccl11	chemokine (C-C motif) ligand 11	2.94e-32
Arhgdib	Rho, GDP dissociation inhibitor (GDI) beta	3.92e-32
Hs3st3a1	heparan sulfate (glucosamine) 3-O-sulfotransferase 3A1	4.91e-32
Cdcp1	CUB domain containing protein 1	5.56e-32
Adam12	a disintegrin and metallopeptidase domain 12 (meltrin alpha)	9.92e-32
Tmem51	transmembrane protein 51	1.02e-31
Uqcrq	ubiquinol-cytochrome c reductase, complex III subunit VII	1.21e-31
Asb12	ankyrin repeat and SOCS box-containing 12	1.23e-31
Igsf9	immunoglobulin superfamily, member 9	1.38e-31
Antxr1	anthrax toxin receptor 1	1.52e-31
Gpx1	glutathione peroxidase 1	1.77e-31
Gpr68	G protein-coupled receptor 68	1.85e-31
Cldn14	claudin 14	1.96e-31
Nudt3	nudix (nucleotide diphosphate linked moiety X)-type motif 3	2.03e-31
Itgax	integrin alpha X	2.17e-31
Tmem65	transmembrane protein 65	2.52e-31
Hmox1	heme oxygenase (decycling) 1	2.53e-31
Col5a1	collagen, type V, alpha 1	2.54e-31
Ids	iduronate 2-sulfatase	2.65e-31
Nox4	NADPH oxidase 4	2.75e-31
Nck2	non-catalytic region of tyrosine kinase adaptor protein 2	3.01e-31
Sulf1	sulfatase 1	3.11e-31
Cxcl9	chemokine (C-X-C motif) ligand 9	3.3e-31
Sipa1l3	signal-induced proliferation-associated 1 like 3	6.65e-31
Adar	adenosine deaminase, RNA-specific	6.99e-31
Cmtm3	CKLF-like MARVEL transmembrane domain containing 3	7.05e-31
Tspan32	tetraspanin 32	7.25e-31
Edn2	endothelin 2	7.99e-31
Zfp161	zinc finger protein 161	8.89e-31
Sp4	trans-acting transcription factor 4	1.11e-30
Paip1	polyadenylate binding protein-interacting protein 1	1.12e-30
Aspn	asporin	1.16e-30
Loxl1	lysyl oxidase-like 1	1.37e-30
Trem1	triggering receptor expressed on myeloid cells 1	1.55e-30
Abl1	c-abl oncogene 1, receptor tyrosine kinase	1.7e-30
Cybb	cytochrome b-245, beta polypeptide	2.18e-30
Akap3	A kinase (PRKA) anchor protein 3	3.67e-30
Lass6	LAG1 homolog, ceramide synthase 6	3.86e-30
Yipf1	Yip1 domain family, member 1	3.86e-30
Tmprss11e	transmembrane protease, serine 11e	3.9e-30
Ddr1	discoidin domain receptor family, member 1	4.58e-30
Nebl	nebulette	6.14e-30
Zc3hav1	zinc finger CCCH type, antiviral 1	6.21e-30
Ampd3	adenosine monophosphate deaminase 3	6.38e-30
Larp2	La ribonucleoprotein domain family, member 2	8.45e-30
Slamf8	SLAM family member 8	9.14e-30
Rgs1	regulator of G-protein signaling 1	9.89e-30
B4galt1	UDP-Gal:betaGlcNAc beta 1,4- galactosyltransferase, polypeptide 1	1.01e-29
Tmprss2	transmembrane protease, serine 2	1.09e-29
Arhgef18	rho/rac guanine nucleotide exchange factor (GEF) 18	1.1e-29
Nfx1	nuclear transcription factor, X-box binding 1	1.14e-29
Gpd2	glycerol phosphate dehydrogenase 2, mitochondrial	1.39e-29
Grp	gastrin releasing peptide	1.45e-29
Ppic	peptidylprolyl isomerase C	1.52e-29
Crkl	v-crk sarcoma virus CT10 oncogene homolog (avian)-like	1.63e-29
Gnptab	N-acetylglucosamine-1-phosphate transferase, alpha and beta subunits	1.76e-29
Pcdhgc4	---	1.83e-29
Cryaa	crystallin, alpha A	1.85e-29
Npffr2	neuropeptide FF receptor 2	1.89e-29
Irf2	interferon regulatory factor 2	2.31e-29
Rasgrp1	RAS guanyl releasing protein 1	2.36e-29
Sorl1	sortilin-related receptor, LDLR class A repeats-containing	2.38e-29
Trip12	thyroid hormone receptor interactor 12	2.57e-29
Slc25a2	solute carrier family 25 (mitochondrial carrier, ornithine transporter) member 2	2.62e-29
Adam19	a disintegrin and metallopeptidase domain 19 (meltrin beta)	2.71e-29
Wdr1	WD repeat domain 1	3.14e-29
Fbn2	fibrillin 2	3.34e-29
Lrrtm4	leucine rich repeat transmembrane neuronal 4	3.36e-29
Ndufa1	NADH dehydrogenase (ubiquinone) 1 alpha subcomplex, 1	3.67e-29
Alg1	asparagine-linked glycosylation 1 homolog (yeast, beta-1,4-mannosyltransferase)	4.13e-29
Plxdc2	plexin domain containing 2	4.45e-29
Fras1	Fraser syndrome 1 homolog (human)	4.9e-29
Fcer1g	Fc receptor, IgE, high affinity I, gamma polypeptide	4.93e-29
S100a14	S100 calcium binding protein A14	5.51e-29
Cdkn2a	cyclin-dependent kinase inhibitor 2A	5.71e-29
Itgbl1	integrin, beta-like 1	6.5e-29
Tlr2	toll-like receptor 2	7.12e-29
Arf4	ADP-ribosylation factor 4	7.63e-29
Ticam1	toll-like receptor adaptor molecule 1	8.35e-29
Stmn4	stathmin-like 4	8.49e-29
Tlr7	toll-like receptor 7	8.87e-29
Sec61b	Sec61 beta subunit	9.1e-29
Samd9l	sterile alpha motif domain containing 9-like	9.31e-29
Sar1a	SAR1 gene homolog A (S. cerevisiae)	9.49e-29
Scamp1	secretory carrier membrane protein 1	9.91e-29
Cxcl11	chemokine (C-X-C motif) ligand 11	1e-28
Rbm15b	RNA binding motif protein 15B	1.3e-28
Gpr39	G protein-coupled receptor 39	1.31e-28
Pkd2l1	polycystic kidney disease 2-like 1	1.56e-28
Batf	basic leucine zipper transcription factor, ATF-like	1.81e-28
Sostdc1	sclerostin domain containing 1	1.94e-28
Zdhhc21	zinc finger, DHHC domain containing 21	1.97e-28
Odz3	odd Oz/ten-m homolog 3 (Drosophila)	1.98e-28
Fhl3	four and a half LIM domains 3	2e-28
Il31ra	interleukin 31 receptor A	2.14e-28
Wsb2	WD repeat and SOCS box-containing 2	2.42e-28
Pak2	p21 (CDKN1A)-activated kinase 2	2.46e-28
Arf1	ADP-ribosylation factor 1	2.57e-28
Upp1	uridine phosphorylase 1	2.77e-28
Mgat4a	mannoside acetylglucosaminyltransferase 4, isoenzyme A	2.84e-28
Cish	cytokine inducible SH2-containing protein	3.1e-28
Gk2	glycerol kinase 2	3.32e-28
Ippk	inositol 1,3,4,5,6-pentakisphosphate 2-kinase	3.85e-28
Gp5	glycoprotein 5 (platelet)	4.27e-28
Reps2	RALBP1 associated Eps domain containing protein 2	4.57e-28
Lmo1	LIM domain only 1	4.6e-28
Cox6c	cytochrome c oxidase, subunit VIc	5.11e-28
Esrrb	estrogen related receptor, beta	5.33e-28
Sh3rf1	SH3 domain containing ring finger 1	5.34e-28
Gucy1b2	guanylate cyclase 1, soluble, beta 2	5.78e-28
Kbtbd3	kelch repeat and BTB (POZ) domain containing 3	5.95e-28
Vav2	vav 2 oncogene	6.18e-28
Mef2b	myocyte enhancer factor 2B	7.03e-28
P2ry10	purinergic receptor P2Y, G-protein coupled 10	7.16e-28
Tnfrsf18	tumor necrosis factor receptor superfamily, member 18	7.19e-28
Dnaja4	DnaJ (Hsp40) homolog, subfamily A, member 4	7.54e-28
Fap	fibroblast activation protein	8e-28
Fpr1	formyl peptide receptor 1	9.7e-28
Egr4	---	1.01e-27
Rtp1	receptor transporter protein 1	1.04e-27
Cldn6	claudin 6	1.06e-27
Col1a2	collagen, type I, alpha 2	1.07e-27
Igsf6	immunoglobulin superfamily, member 6	1.52e-27
F11r	F11 receptor	1.56e-27
Slc7a13	solute carrier family 7, (cationic amino acid transporter, y+ system) member 13	1.63e-27
Mt4	metallothionein 4	1.67e-27
Bik	BCL2-interacting killer	1.7e-27
Pdlim5	PDZ and LIM domain 5	1.85e-27
Eif4a2	eukaryotic translation initiation factor 4A2	1.95e-27
Bmp8b	bone morphogenetic protein 8b	1.97e-27
Hapln1	hyaluronan and proteoglycan link protein 1	2.08e-27
Syt9	synaptotagmin IX	2.08e-27
Whsc2	Wolf-Hirschhorn syndrome candidate 2 (human)	2.08e-27
Atp6ap1	ATPase, H+ transporting, lysosomal accessory protein 1	2.11e-27
Pag1	phosphoprotein associated with glycosphingolipid microdomains 1	2.31e-27
Rffl	ring finger and FYVE like domain containing protein	2.54e-27
Acot11	acyl-CoA thioesterase 11	2.98e-27
Slc37a2	solute carrier family 37 (glycerol-3-phosphate transporter), member 2	2.99e-27
Socs6	suppressor of cytokine signaling 6	3.06e-27
Ccrn4l	CCR4 carbon catabolite repression 4-like (S. cerevisiae)	3.18e-27
Coq10b	coenzyme Q10 homolog B (S. cerevisiae)	3.3e-27
Col3a1	collagen, type III, alpha 1	3.32e-27
Slc6a18	solute carrier family 6 (neurotransmitter transporter), member 18	3.34e-27
Fbxl20	F-box and leucine-rich repeat protein 20	3.35e-27
Cdc42se1	CDC42 small effector 1	3.55e-27
Ntng2	netrin G2	3.92e-27
Hsbp1	heat shock factor binding protein 1	4.02e-27
Gpr65	G-protein coupled receptor 65	4.21e-27
Sln	sarcolipin	4.21e-27
Dolpp1	dolichyl pyrophosphate phosphatase 1	4.56e-27
Hcls1	hematopoietic cell specific Lyn substrate 1	4.7e-27
Mapre1	microtubule-associated protein, RP/EB family, member 1	4.85e-27
Atp10a	ATPase, class V, type 10A	4.91e-27
Katnal2	katanin p60 subunit A-like 2	5.05e-27
Tardbp	TAR DNA binding protein	5.42e-27
Tmem149	transmembrane protein 149	6.52e-27
Fam49b	family with sequence similarity 49, member B	6.77e-27
Tanc2	tetratricopeptide repeat, ankyrin repeat and coiled-coil containing 2	7.48e-27
Plekha2	pleckstrin homology domain-containing, family A (phosphoinositide binding specific) member 2	7.71e-27
Cyba	cytochrome b-245, alpha polypeptide	8.01e-27
Il13ra1	interleukin 13 receptor, alpha 1	8.02e-27
Angel1	angel homolog 1 (Drosophila)	8.59e-27
Cdc42bpb	CDC42 binding protein kinase beta	8.73e-27
Mnda	---	8.74e-27
Frmd4a	FERM domain containing 4A	9.06e-27
Ppfibp1	PTPRF interacting protein, binding protein 1 (liprin beta 1)	9.06e-27
Txndc3	thioredoxin domain containing 3 (spermatozoa)	9.19e-27
Foxe1	forkhead box E1	9.42e-27
Polr3e	polymerase (RNA) III (DNA directed) polypeptide E	9.71e-27
Ppp6c	protein phosphatase 6, catalytic subunit	1.01e-26
Npas2	neuronal PAS domain protein 2	1.02e-26
Mmp10	matrix metallopeptidase 10	1.05e-26
Snca	synuclein, alpha	1.1e-26
Tmem162	transmembrane protein 162	1.11e-26
Sfmbt1	Scm-like with four mbt domains 1	1.13e-26
Cdh15	cadherin 15	1.14e-26
Kif3c	kinesin family member 3C	1.14e-26
Syngr2	synaptogyrin 2	1.14e-26
Sgpl1	sphingosine phosphate lyase 1	1.43e-26
Fam113b	family with sequence similarity 113, member B	1.51e-26
Edem1	ER degradation enhancer, mannosidase alpha-like 1	1.54e-26
Ccr1	chemokine (C-C motif) receptor 1	1.64e-26
Muc2	mucin 2	1.86e-26
Lpgat1	lysophosphatidylglycerol acyltransferase 1	1.88e-26
Itgb2	integrin beta 2	1.97e-26
Serp1	stress-associated endoplasmic reticulum protein 1	1.98e-26
Emr1	EGF-like module containing, mucin-like, hormone receptor-like sequence 1	2.11e-26
Tpm1	tropomyosin 1, alpha	2.2e-26
Pgpep1	pyroglutamyl-peptidase I	2.35e-26
Traf3ip3	TRAF3 interacting protein 3	2.4e-26
Cpne9	copine family member IX	2.58e-26
Hoxb5	homeo box B5	2.64e-26
Ddx58	DEAD (Asp-Glu-Ala-Asp) box polypeptide 58	2.77e-26
Psip1	PC4 and SFRS1 interacting protein 1	2.79e-26
Slc2a10	solute carrier family 2 (facilitated glucose transporter), member 10	2.94e-26
Sqrdl	sulfide quinone reductase-like (yeast)	2.97e-26
Adora3	adenosine A3 receptor	3.15e-26
Adamdec1	ADAM-like, decysin 1	3.25e-26
Pik3cd	phosphatidylinositol 3-kinase catalytic delta polypeptide	3.43e-26
Vav3	vav 3 oncogene	3.48e-26
Enc1	ectodermal-neural cortex 1	3.52e-26
Dok3	docking protein 3	3.98e-26
Ccdc106	coiled-coil domain containing 106	4.08e-26
Dusp9	dual specificity phosphatase 9	4.43e-26
Cd2	CD2 antigen	4.55e-26
Plch1	phospholipase C, eta 1	4.57e-26
Mmp17	matrix metallopeptidase 17	4.63e-26
Tnp2	transition protein 2	4.92e-26
Pkp2	plakophilin 2	4.96e-26
Dtnbp1	dystrobrevin binding protein 1	5.52e-26
Pcbp3	poly(rC) binding protein 3	5.69e-26
Rnf133	ring finger protein 133	6.55e-26
Spsb1	splA/ryanodine receptor domain and SOCS box containing 1	6.84e-26
Oaz3	ornithine decarboxylase antizyme 3	7.13e-26
Bspry	B-box and SPRY domain containing	7.41e-26
Cotl1	coactosin-like 1 (Dictyostelium)	7.61e-26
Rod1	ROD1 regulator of differentiation 1 (S. pombe)	8.95e-26
St8sia4	ST8 alpha-N-acetyl-neuraminide alpha-2,8-sialyltransferase 4	8.95e-26
Stxbp6	syntaxin binding protein 6 (amisyn)	9e-26
Adcyap1r1	adenylate cyclase activating polypeptide 1 receptor 1	9.25e-26
Pvrl4	poliovirus receptor-related 4	9.3e-26
Cd276	CD276 antigen	1.09e-25
Wnt4	wingless-related MMTV integration site 4	1.09e-25
Tmc2	transmembrane channel-like gene family 2	1.13e-25
Prodh2	proline dehydrogenase (oxidase) 2	1.14e-25
Edil3	EGF-like repeats and discoidin I-like domains 3	1.16e-25
Lrp10	low-density lipoprotein receptor-related protein 10	1.18e-25
Prg3	proteoglycan 3	1.18e-25
Pou3f2	POU domain, class 3, transcription factor 2	1.2e-25
Hoxb2	homeo box B2	1.21e-25
Alk	anaplastic lymphoma kinase	1.25e-25
Wnt10a	wingless related MMTV integration site 10a	1.29e-25
Ifnk	interferon kappa	1.31e-25
Slc12a1	solute carrier family 12, member 1	1.34e-25
Ovol1	OVO homolog-like 1 (Drosophila)	1.45e-25
Zfp64	zinc finger protein 64	1.46e-25
Alox5	arachidonate 5-lipoxygenase	1.47e-25
Arl15	ADP-ribosylation factor-like 15	1.54e-25
Pyy	peptide YY	1.57e-25
Slc22a15	solute carrier family 22 (organic anion/cation transporter), member 15	1.72e-25
Phex	phosphate regulating gene with homologies to endopeptidases on the X chromosome (hypophosphatemia, vitamin D resistant rickets)	1.75e-25
Tph2	tryptophan hydroxylase 2	1.75e-25
Ascl2	achaete-scute complex homolog 2 (Drosophila)	1.85e-25
Napb	N-ethylmaleimide sensitive fusion protein attachment protein beta	2.18e-25
Brd4	bromodomain containing 4	2.19e-25
Ssbp3	single-stranded DNA binding protein 3	2.21e-25
C3ar1	complement component 3a receptor 1	2.27e-25
Acox1	acyl-Coenzyme A oxidase 1, palmitoyl	2.32e-25
Piwil1	piwi-like homolog 1 (Drosophila)	2.33e-25
Tulp4	tubby like protein 4	2.42e-25
Sorcs2	sortilin-related VPS10 domain containing receptor 2	2.63e-25
Cnot4	CCR4-NOT transcription complex, subunit 4	2.76e-25
Trub1	TruB pseudouridine (psi) synthase homolog 1 (E. coli)	2.78e-25
Polm	polymerase (DNA directed), mu	2.81e-25
Astn2	astrotactin 2	2.87e-25
Synpr	synaptoporin	2.99e-25
Cd8a	CD8 antigen, alpha chain	3.14e-25
Ccdc54	coiled-coil domain containing 54	3.17e-25
Kera	keratocan	3.48e-25
Spz1	spermatogenic leucine zipper 1	3.72e-25
Crhr1	corticotropin releasing hormone receptor 1	3.98e-25
Tlr1	toll-like receptor 1	4.01e-25
Gp2	glycoprotein 2 (zymogen granule membrane)	4.06e-25
Maged1	melanoma antigen, family D, 1	4.14e-25
Cd83	CD83 antigen	4.29e-25
Tmed4	transmembrane emp24 protein transport domain containing 4	4.4e-25
Wfdc12	WAP four-disulfide core domain 12	4.53e-25
Reep3	receptor accessory protein 3	4.62e-25
Ppard	peroxisome proliferator activator receptor delta	4.71e-25
Kcna2	potassium voltage-gated channel, shaker-related subfamily, member 2	4.94e-25
Slamf9	SLAM family member 9	5.09e-25
Ppara	peroxisome proliferator activated receptor alpha	5.21e-25
Cd14	CD14 antigen	5.37e-25
Surf4	surfeit gene 4	5.68e-25
Slc17a6	solute carrier family 17 (sodium-dependent inorganic phosphate cotransporter), member 6	6.05e-25
Nudt13	nudix (nucleoside diphosphate linked moiety X)-type motif 13	6.07e-25
Htr4	5 hydroxytryptamine (serotonin) receptor 4	6.08e-25
Rgs10	regulator of G-protein signalling 10	6.22e-25
Thbs2	thrombospondin 2	7.58e-25
Gpr22	G protein-coupled receptor 22	7.7e-25
Camk1d	calcium/calmodulin-dependent protein kinase ID	7.89e-25
Ccr5	chemokine (C-C motif) receptor 5	7.9e-25
Slc6a1	solute carrier family 6 (neurotransmitter transporter, GABA), member 1	8.02e-25
Loxl2	lysyl oxidase-like 2	8.13e-25
C1qtnf5	C1q and tumor necrosis factor related protein 5	8.33e-25
Syk	spleen tyrosine kinase	8.37e-25
Slc44a2	solute carrier family 44, member 2	8.54e-25
Prkaa2	protein kinase, AMP-activated, alpha 2 catalytic subunit	9.03e-25
Atad4	ATPase family, AAA domain containing 4	9.1e-25
Btbd9	BTB (POZ) domain containing 9	9.22e-25
Runx2	runt related transcription factor 2	9.41e-25
Slc25a17	solute carrier family 25 (mitochondrial carrier, peroxisomal membrane protein), member 17	1.01e-24
Ormdl2	ORM1-like 2 (S. cerevisiae)	1.02e-24
Slc34a1	solute carrier family 34 (sodium phosphate), member 1	1.06e-24
Ankrd13d	ankyrin repeat domain 13 family, member D	1.07e-24
Crh	corticotropin releasing hormone	1.09e-24
Scyl3	SCY1-like 3 (S. cerevisiae)	1.1e-24
B3galt5	UDP-Gal:betaGlcNAc beta 1,3-galactosyltransferase, polypeptide 5	1.11e-24
Matn1	matrilin 1, cartilage matrix protein	1.12e-24
C1ql3	C1q-like 3	1.13e-24
Golt1a	golgi transport 1 homolog A (S. cerevisiae)	1.19e-24
Dlg3	discs, large homolog 3 (Drosophila)	1.21e-24
Npc1l1	NPC1-like 1	1.22e-24
Pphln1	periphilin 1	1.23e-24
Tsen34	---	1.23e-24
Card9	caspase recruitment domain family, member 9	1.25e-24
Epn3	epsin 3	1.3e-24
Snx11	sorting nexin 11	1.3e-24
Stau2	staufen (RNA binding protein) homolog 2 (Drosophila)	1.34e-24
Tor1aip2	torsin A interacting protein 2	1.34e-24
Cnnm4	cyclin M4	1.37e-24
Kdr	kinase insert domain protein receptor	1.47e-24
Bmi1	Bmi1 polycomb ring finger oncogene	1.49e-24
Gfer	growth factor, erv1 (S. cerevisiae)-like (augmenter of liver regeneration)	1.57e-24
Atp9b	ATPase, class II, type 9B	1.61e-24
Olig3	oligodendrocyte transcription factor 3	1.72e-24
Micalcl	MICAL C-terminal like	1.73e-24
Gcgr	glucagon receptor	1.78e-24
Nat2	N-acetyltransferase 2 (arylamine N-acetyltransferase)	1.83e-24
Bmper	BMP-binding endothelial regulator	1.84e-24
Stk10	serine/threonine kinase 10	1.88e-24
Trpc2	---	1.9e-24
Mef2d	myocyte enhancer factor 2D	1.98e-24
Fyb	FYN binding protein	2.03e-24
Dact1	dapper homolog 1, antagonist of beta-catenin (xenopus)	2.07e-24
Aftph	aftiphilin	2.09e-24
Srpx2	sushi-repeat-containing protein, X-linked 2	2.1e-24
Zmpste24	zinc metallopeptidase, STE24 homolog (S. cerevisiae)	2.11e-24
Apex2	apurinic/apyrimidinic endonuclease 2	2.25e-24
Cecr6	cat eye syndrome chromosome region, candidate 6 homolog (human)	2.28e-24
Sphk1	sphingosine kinase 1	2.42e-24
Glipr1	GLI pathogenesis-related 1 (glioma)	2.56e-24
Btrc	beta-transducin repeat containing protein	2.57e-24
Pdxk	pyridoxal (pyridoxine, vitamin B6) kinase	2.57e-24
Dhx33	DEAH (Asp-Glu-Ala-His) box polypeptide 33	2.58e-24
Phf16	PHD finger protein 16	2.61e-24
Fndc3b	fibronectin type III domain containing 3B	2.71e-24
Tnfrsf13c	---	2.74e-24
Plek	pleckstrin	2.91e-24
Calcb	calcitonin-related polypeptide, beta	3e-24
Sfrp2	secreted frizzled-related protein 2	3.05e-24
Rnh1	ribonuclease/angiogenin inhibitor 1	3.19e-24
Plg	plasminogen	3.44e-24
Ralgps2	Ral GEF with PH domain and SH3 binding motif 2	3.5e-24
Ctla4	cytotoxic T-lymphocyte-associated protein 4	3.54e-24
Rasl11b	RAS-like, family 11, member B	3.73e-24
Lamp2	lysosomal-associated membrane protein 2	3.75e-24
Tshr	thyroid stimulating hormone receptor	3.75e-24
Ifit2	interferon-induced protein with tetratricopeptide repeats 2	3.83e-24
Il2ra	interleukin 2 receptor, alpha chain	3.83e-24
Spn	sialophorin	4.13e-24
Kcnq1	potassium voltage-gated channel, subfamily Q, member 1	4.26e-24
Sh3bgrl3	SH3 domain binding glutamic acid-rich protein-like 3	4.35e-24
Dnajb12	DnaJ (Hsp40) homolog, subfamily B, member 12	4.39e-24
Nrp2	neuropilin 2	4.48e-24
Tmem161b	transmembrane protein 161B	4.51e-24
Fam84a	family with sequence similarity 84, member A	4.69e-24
Ms4a7	membrane-spanning 4-domains, subfamily A, member 7	4.76e-24
Prrt3	proline-rich transmembrane protein 3	5.04e-24
Slc41a2	solute carrier family 41, member 2	5.04e-24
Pacsin1	protein kinase C and casein kinase substrate in neurons 1	5.08e-24
Tagap	T-cell activation Rho GTPase-activating protein	5.21e-24
Arpm1	actin related protein M1	5.26e-24
Sla	src-like adaptor	5.44e-24
Ctsz	cathepsin Z	5.62e-24
Krt19	keratin 19	5.71e-24
Met	met proto-oncogene	5.78e-24
Dock8	dedicator of cytokinesis 8	5.9e-24
Axin2	axin2	6.03e-24
Rag2	recombination activating gene 2	6.08e-24
Eaf1	ELL associated factor 1	6.25e-24
Krt1	keratin 1	6.51e-24
Tbx21	T-box 21	6.51e-24
Sgcd	sarcoglycan, delta (dystrophin-associated glycoprotein)	6.53e-24
Atp2c1	ATPase, Ca++-sequestering	6.59e-24
Stk11ip	serine/threonine kinase 11 interacting protein	6.62e-24
Fgf1	fibroblast growth factor 1	6.65e-24
Ncf2	neutrophil cytosolic factor 2	6.65e-24
Spock2	sparc/osteonectin, cwcv and kazal-like domains proteoglycan 2	6.75e-24
Wipi1	WD repeat domain, phosphoinositide interacting 1	7.07e-24
Rshl1	radial spokehead-like 1	7.51e-24
Adcy7	adenylate cyclase 7	7.91e-24
Nrsn1	neurensin 1	7.99e-24
Zic4	zinc finger protein of the cerebellum 4	8.18e-24
Aif1	allograft inflammatory factor 1	8.35e-24
Cno	cappuccino	8.56e-24
Nedd8	neural precursor cell expressed, developmentally down-regulated gene 8	8.83e-24
Pcdh7	protocadherin 7	8.85e-24
Scarb2	scavenger receptor class B, member 2	9.08e-24
Ltb	lymphotoxin B	9.42e-24
Tas1r2	taste receptor, type 1, member 2	9.47e-24
F2rl2	coagulation factor II (thrombin) receptor-like 2	9.61e-24
Sgpp2	sphingosine-1-phosphate phosphotase 2	9.77e-24
Gtdc1	glycosyltransferase-like domain containing 1	9.88e-24
Abca1	ATP-binding cassette, sub-family A (ABC1), member 1	9.89e-24
Ndrg1	N-myc downstream regulated gene 1	1.01e-23
Wnt8a	wingless-related MMTV integration site 8A	1.04e-23
Dyrk1a	dual-specificity tyrosine-(Y)-phosphorylation regulated kinase 1a	1.05e-23
Tpsb2	tryptase beta 2	1.05e-23
P2ry4	pyrimidinergic receptor P2Y, G-protein coupled, 4	1.08e-23
Ftmt	ferritin mitochondrial	1.11e-23
Ndufc2	NADH dehydrogenase (ubiquinone) 1, subcomplex unknown, 2	1.17e-23
Spint2	serine protease inhibitor, Kunitz type 2	1.19e-23
Dpysl5	dihydropyrimidinase-like 5	1.21e-23
Rab21	RAB21, member RAS oncogene family	1.22e-23
Il11	interleukin 11	1.23e-23
Apba2	amyloid beta (A4) precursor protein-binding, family A, member 2	1.24e-23
Cntnap4	contactin associated protein-like 4	1.24e-23
Rxfp1	relaxin/insulin-like family peptide receptor 1	1.25e-23
Znhit2	zinc finger, HIT domain containing 2	1.25e-23
C1qa	complement component 1, q subcomponent, alpha polypeptide	1.27e-23
Ociad2	OCIA domain containing 2	1.28e-23
Fmo3	flavin containing monooxygenase 3	1.29e-23
Gpr83	G protein-coupled receptor 83	1.31e-23
Hsd17b6	hydroxysteroid (17-beta) dehydrogenase 6	1.35e-23
Insm1	insulinoma-associated 1	1.37e-23
Cobll1	Cobl-like 1	1.42e-23
Chst5	carbohydrate (N-acetylglucosamine 6-O) sulfotransferase 5	1.44e-23
Entpd4	ectonucleoside triphosphate diphosphohydrolase 4	1.44e-23
Myt1	myelin transcription factor 1	1.48e-23
Slc4a4	solute carrier family 4 (anion exchanger), member 4	1.51e-23
Lman1	lectin, mannose-binding, 1	1.52e-23
Slc16a13	solute carrier family 16 (monocarboxylic acid transporters), member 13	1.52e-23
Lcorl	ligand dependent nuclear receptor corepressor-like	1.53e-23
Rabac1	Rab acceptor 1 (prenylated)	1.57e-23
Slc6a7	solute carrier family 6 (neurotransmitter transporter, L-proline), member 7	1.66e-23
Il2rg	interleukin 2 receptor, gamma chain	1.76e-23
Ciita	class II transactivator	1.86e-23
Spire1	spire homolog 1 (Drosophila)	1.86e-23
Pla2g2d	phospholipase A2, group IID	1.88e-23
Asb7	ankyrin repeat and SOCS box-containing 7	1.91e-23
Glb1	galactosidase, beta 1	1.91e-23
Cyp7a1	cytochrome P450, family 7, subfamily a, polypeptide 1	1.93e-23
Sympk	symplekin	1.93e-23
Bcl7a	B-cell CLL/lymphoma 7A	1.98e-23
Ggcx	gamma-glutamyl carboxylase	2.02e-23
Tnfsf15	tumor necrosis factor (ligand) superfamily, member 15	2.08e-23
Tgfb3	transforming growth factor, beta 3	2.16e-23
Kcnip2	Kv channel-interacting protein 2	2.18e-23
Cds2	CDP-diacylglycerol synthase (phosphatidate cytidylyltransferase) 2	2.2e-23
Krt27	keratin 27	2.21e-23
Cd300lb	CD300 antigen like family member B	2.24e-23
Siglec5	sialic acid binding Ig-like lectin 5	2.25e-23
Lum	lumican	2.26e-23
Smug1	single-strand selective monofunctional uracil DNA glycosylase	2.27e-23
Grn	granulin	2.28e-23
Ovol2	ovo-like 2 (Drosophila)	2.47e-23
Scarb1	scavenger receptor class B, member 1	2.51e-23
Hoxb4	homeo box B4	2.57e-23
Slc2a2	solute carrier family 2 (facilitated glucose transporter), member 2	2.57e-23
Npepl1	aminopeptidase-like 1	2.59e-23
Lars	leucyl-tRNA synthetase	2.64e-23
Klkb1	kallikrein B, plasma 1	2.72e-23
Tmem30b	transmembrane protein 30B	2.72e-23
Trpc5	transient receptor potential cation channel, subfamily C, member 5	2.81e-23
Rprm	reprimo, TP53 dependent G2 arrest mediator candidate	2.85e-23
Ankrd22	ankyrin repeat domain 22	3.16e-23
Chrna6	cholinergic receptor, nicotinic, alpha polypeptide 6	3.37e-23
Foxa3	forkhead box A3	3.38e-23
Snn	stannin	3.49e-23
Kpna1	karyopherin (importin) alpha 1	3.55e-23
Hivep3	human immunodeficiency virus type I enhancer binding protein 3	3.69e-23
Myh10	myosin, heavy polypeptide 10, non-muscle	3.72e-23
Apln	apelin	3.93e-23
Adamts16	a disintegrin-like and metallopeptidase (reprolysin type) with thrombospondin type 1 motif, 16	4.04e-23
Hsd3b2	hydroxy-delta-5-steroid dehydrogenase, 3 beta- and steroid delta-isomerase 2	4.09e-23
Sirt5	sirtuin 5 (silent mating type information regulation 2 homolog) 5 (S. cerevisiae)	4.19e-23
Marveld1	MARVEL (membrane-associating) domain containing 1	4.2e-23
Creb3l4	cAMP responsive element binding protein 3-like 4	4.21e-23
Slc2a4	solute carrier family 2 (facilitated glucose transporter), member 4	4.24e-23
Il1b	interleukin 1 beta	4.26e-23
Magel2	melanoma antigen, family L, 2	4.36e-23
Ecm2	extracellular matrix protein 2, female organ and adipocyte specific	4.64e-23
B3galnt1	UDP-GalNAc:betaGlcNAc beta 1,3-galactosaminyltransferase, polypeptide 1	4.67e-23
Irx1	Iroquois related homeobox 1 (Drosophila)	4.75e-23
Lztr1	leucine-zipper-like transcriptional regulator, 1	4.81e-23
Atf7	activating transcription factor 7	4.83e-23
Btn1a1	butyrophilin, subfamily 1, member A1	5.06e-23
Trim59	tripartite motif-containing 59	5.09e-23
Fam101a	family with sequence similarity 101, member A	5.36e-23
Wnt3	wingless-related MMTV integration site 3	5.55e-23
Tnfaip3	tumor necrosis factor, alpha-induced protein 3	5.68e-23
Smcp	sperm mitochondria-associated cysteine-rich protein	5.88e-23
Dennd2d	DENN/MADD domain containing 2D	5.91e-23
Tuba8	tubulin, alpha 8	5.96e-23
Sfrp5	secreted frizzled-related sequence protein 5	5.97e-23
Scyl2	SCY1-like 2 (S. cerevisiae)	6e-23
Adcy5	adenylate cyclase 5	6.04e-23
Col4a5	collagen, type IV, alpha 5	6.04e-23
Tnni3k	TNNI3 interacting kinase	6.06e-23
Grb7	growth factor receptor bound protein 7	6.12e-23
Gbp5	guanylate binding protein 5	6.15e-23
Mfsd1	major facilitator superfamily domain containing 1	6.29e-23
Crlf3	cytokine receptor-like factor 3	6.35e-23
Pdgfc	platelet-derived growth factor, C polypeptide	6.43e-23
Aph1b	anterior pharynx defective 1b homolog (C. elegans)	6.54e-23
Echdc3	enoyl Coenzyme A hydratase domain containing 3	6.64e-23
Lipg	lipase, endothelial	6.96e-23
Jph2	junctophilin 2	6.98e-23
Tspan9	tetraspanin 9	7.06e-23
Fgd2	FYVE, RhoGEF and PH domain containing 2	7.51e-23
Phactr3	phosphatase and actin regulator 3	7.91e-23
Hfe	hemochromatosis	8.04e-23
Zdhhc24	zinc finger, DHHC domain containing 24	8.05e-23
Mterfd2	MTERF domain containing 2	8.13e-23
Wibg	within bgcn homolog (Drosophila)	8.2e-23
Fgf11	fibroblast growth factor 11	8.3e-23
Efhc2	EF-hand domain (C-terminal) containing 2	8.5e-23
Enam	enamelin	8.79e-23
Adarb1	adenosine deaminase, RNA-specific, B1	8.8e-23
Amelx	amelogenin X chromosome	8.96e-23
Zc3h12d	zinc finger CCCH type containing 12D	9.12e-23
Cyp27b1	cytochrome P450, family 27, subfamily b, polypeptide 1	9.35e-23
Nol4	nucleolar protein 4	9.42e-23
Hcrtr2	hypocretin (orexin) receptor 2	9.85e-23
Casd1	CAS1 domain containing 1	9.89e-23
Rtp4	receptor transporter protein 4	1.04e-22
Kcnj5	potassium inwardly-rectifying channel, subfamily J, member 5	1.05e-22
Atp6v0a2	ATPase, H+ transporting, lysosomal V0 subunit A2	1.06e-22
Arhgap1	Rho GTPase activating protein 1	1.09e-22
Crhbp	corticotropin releasing hormone binding protein	1.13e-22
Grm6	glutamate receptor, metabotropic 6	1.14e-22
Phf15	PHD finger protein 15	1.14e-22
Itgb1	integrin beta 1 (fibronectin receptor beta)	1.16e-22
Bmpr2	bone morphogenic protein receptor, type II (serine/threonine kinase)	1.19e-22
Ifi35	interferon-induced protein 35	1.19e-22
Slc7a7	---	1.2e-22
Slco5a1	solute carrier organic anion transporter family, member 5A1	1.2e-22
Abhd1	---	1.24e-22
Trim8	tripartite motif protein 8	1.24e-22
Kcnd2	potassium voltage-gated channel, Shal-related family, member 2	1.26e-22
Syt13	synaptotagmin XIII	1.3e-22
Abhd13	abhydrolase domain containing 13	1.38e-22
Elk3	ELK3, member of ETS oncogene family	1.4e-22
Ank3	ankyrin 3, epithelial	1.44e-22
Mafb	v-maf musculoaponeurotic fibrosarcoma oncogene family, protein B (avian)	1.52e-22
Cndp1	carnosine dipeptidase 1 (metallopeptidase M20 family)	1.54e-22
Olfml2b	olfactomedin-like 2B	1.67e-22
Tram2	translocating chain-associating membrane protein 2	1.72e-22
Pttg1ip	pituitary tumor-transforming 1 interacting protein	1.73e-22
Chst1	carbohydrate (keratan sulfate Gal-6) sulfotransferase 1	1.74e-22
Tbc1d20	TBC1 domain family, member 20	1.74e-22
Aoah	acyloxyacyl hydrolase	1.75e-22
Marveld2	MARVEL (membrane-associating) domain containing 2	1.77e-22
Col8a2	collagen, type VIII, alpha 2	1.78e-22
Spon1	spondin 1, (f-spondin) extracellular matrix protein	1.8e-22
Gabra1	gamma-aminobutyric acid (GABA) A receptor, subunit alpha 1	1.82e-22
Ptpro	protein tyrosine phosphatase, receptor type, O	1.83e-22
Trim34	tripartite motif-containing 34	1.86e-22
Zfyve28	zinc finger, FYVE domain containing 28	1.86e-22
Gaa	glucosidase, alpha, acid	1.89e-22
Spinlw1	serine protease inhibitor-like, with Kunitz and WAP domains 1 (eppin)	1.96e-22
Fndc3a	fibronectin type III domain containing 3A	1.98e-22
Klk10	kallikrein related-peptidase 10	2.04e-22
Fam98a	family with sequence similarity 98, member A	2.1e-22
Snx26	sorting nexin 26	2.17e-22
Ntsr1	neurotensin receptor 1	2.19e-22
Krt4	keratin 4	2.35e-22
Mtpn	myotrophin	2.37e-22
Slc8a1	solute carrier family 8 (sodium/calcium exchanger), member 1	2.43e-22
Adamts4	a disintegrin-like and metallopeptidase (reprolysin type) with thrombospondin type 1 motif, 4	2.44e-22
Npnt	nephronectin	2.45e-22
Cdc42	cell division cycle 42 homolog (S. cerevisiae)	2.46e-22
Gpr17	G protein-coupled receptor 17	2.51e-22
Ttll6	tubulin tyrosine ligase-like family, member 6	2.53e-22
Eomes	eomesodermin homolog (Xenopus laevis)	2.54e-22
Slc28a2	solute carrier family 28 (sodium-coupled nucleoside transporter), member 2	2.61e-22
Cxcr3	chemokine (C-X-C motif) receptor 3	2.63e-22
Wnt7b	wingless-related MMTV integration site 7B	2.64e-22
Csmd1	CUB and Sushi multiple domains 1	2.65e-22
Pycard	PYD and CARD domain containing	2.7e-22
Lhcgr	luteinizing hormone/choriogonadotropin receptor	2.72e-22
Raly	hnRNP-associated with lethal yellow	2.76e-22
Galnt1	UDP-N-acetyl-alpha-D-galactosamine:polypeptide N-acetylgalactosaminyltransferase 1	2.77e-22
Lrg1	leucine-rich alpha-2-glycoprotein 1	2.79e-22
Ptp4a3	protein tyrosine phosphatase 4a3	2.79e-22
Slc22a3	solute carrier family 22 (organic cation transporter), member 3	2.79e-22
Furin	furin (paired basic amino acid cleaving enzyme)	2.8e-22
Rhd	Rh blood group, D antigen	2.86e-22
Atp8b1	ATPase, class I, type 8B, member 1	2.89e-22
Acvr1b	activin A receptor, type 1B	3.01e-22
Ifit1	interferon-induced protein with tetratricopeptide repeats 1	3.04e-22
Dtnb	dystrobrevin, beta	3.05e-22
Sphk2	sphingosine kinase 2	3.08e-22
Inpp5d	inositol polyphosphate-5-phosphatase D	3.14e-22
Nav2	neuron navigator 2	3.16e-22
Oprl1	opioid receptor-like 1	3.29e-22
Sv2a	synaptic vesicle glycoprotein 2 a	3.29e-22
Stc1	stanniocalcin 1	3.38e-22
Kcne4	potassium voltage-gated channel, Isk-related subfamily, gene 4	3.41e-22
Ascl3	achaete-scute complex homolog 3 (Drosophila)	3.47e-22
Fem1c	fem-1 homolog c (C.elegans)	3.49e-22
Wfdc5	WAP four-disulfide core domain 5	3.56e-22
Rgs16	regulator of G-protein signaling 16	3.64e-22
Adora1	adenosine A1 receptor	3.71e-22
Slc7a8	solute carrier family 7 (cationic amino acid transporter, y+ system), member 8	3.82e-22
Klhdc7a	kelch domain containing 7A	3.84e-22
Nr1i2	nuclear receptor subfamily 1, group I, member 2	4.03e-22
Tmem108	transmembrane protein 108	4.05e-22
Wdr42a	WD repeat domain 42A	4.06e-22
Tpte	transmembrane phosphatase with tensin homology	4.21e-22
Pacs1	phosphofurin acidic cluster sorting protein 1	4.27e-22
Cldn16	claudin 16	4.35e-22
Ikbkg	inhibitor of kappaB kinase gamma	4.36e-22
Aff2	AF4/FMR2 family, member 2	4.5e-22
Stag3	stromal antigen 3	4.61e-22
Xpnpep2	X-prolyl aminopeptidase (aminopeptidase P) 2, membrane-bound	4.62e-22
Il21r	interleukin 21 receptor	4.73e-22
Icos	inducible T-cell co-stimulator	4.83e-22
Suds3	suppressor of defective silencing 3 homolog (S. cerevisiae)	4.84e-22
Anxa13	annexin A13	4.86e-22
Erbb2	v-erb-b2 erythroblastic leukemia viral oncogene homolog 2, neuro/glioblastoma derived oncogene homolog (avian)	4.89e-22
Pogk	pogo transposable element with KRAB domain	4.92e-22
Plb1	phospholipase B1	5.12e-22
Slc24a3	solute carrier family 24 (sodium/potassium/calcium exchanger), member 3	5.17e-22
Adc	arginine decarboxylase	5.23e-22
Ptprj	protein tyrosine phosphatase, receptor type, J	5.43e-22
Pla2g7	phospholipase A2, group VII (platelet-activating factor acetylhydrolase, plasma)	5.64e-22
Kcns3	potassium voltage-gated channel, delayed-rectifier, subfamily S, member 3	5.7e-22
Hnf4g	hepatocyte nuclear factor 4, gamma	5.78e-22
Tceal5	transcription elongation factor A (SII)-like 5	5.78e-22
Txnl4a	thioredoxin-like 4A	5.81e-22
Pik3cg	phosphoinositide-3-kinase, catalytic, gamma polypeptide	5.82e-22
Jak3	Janus kinase 3	6.14e-22
Limk2	LIM motif-containing protein kinase 2	6.16e-22
Cck	cholecystokinin	6.29e-22
Plunc	palate, lung, and nasal epithelium associated	6.44e-22
Nfatc2ip	nuclear factor of activated T-cells, cytoplasmic, calcineurin-dependent 2 interacting protein	6.65e-22
Ppm1l	protein phosphatase 1 (formerly 2C)-like	7.01e-22
Lgals9	lectin, galactose binding, soluble 9	7.06e-22
Mmp15	matrix metallopeptidase 15	7.07e-22
Nrgn	neurogranin	7.14e-22
Igsf21	immunoglobin superfamily, member 21	7.35e-22
Kif1a	kinesin family member 1A	7.42e-22
Aldh1l1	aldehyde dehydrogenase 1 family, member L1	7.44e-22
Mx1	myxovirus (influenza virus) resistance 1	7.52e-22
Plac1	placental specific protein 1	7.91e-22
Gltp	glycolipid transfer protein	7.95e-22
Prom2	prominin 2	7.95e-22
Crip1	cysteine-rich protein 1 (intestinal)	8.04e-22
Iqce	IQ motif containing E	8.12e-22
Galntl4	UDP-N-acetyl-alpha-D-galactosamine:polypeptide N-acetylgalactosaminyltransferase-like 4	8.25e-22
Fbp1	fructose bisphosphatase 1	8.33e-22
Wdr55	WD repeat domain 55	8.38e-22
Hist1h4d	histone cluster 1, H4d	8.43e-22
Ccdc56	coiled-coil domain containing 56	8.45e-22
Cbx8	chromobox homolog 8 (Drosophila Pc class)	8.52e-22
Espl1	extra spindle poles-like 1 (S. cerevisiae)	8.91e-22
Tcf21	transcription factor 21	9.3e-22
Npy	neuropeptide Y	9.46e-22
Slc43a2	solute carrier family 43, member 2	9.52e-22
Asb5	ankyrin repeat and SOCs box-containing 5	9.53e-22
Impdh1	inosine 5'-phosphate dehydrogenase 1	9.57e-22
Tap1	transporter 1, ATP-binding cassette, sub-family B (MDR/TAP)	9.58e-22
Abcc5	ATP-binding cassette, sub-family C (CFTR/MRP), member 5	9.76e-22
Pop1	processing of precursor 1, ribonuclease P/MRP family, (S. cerevisiae)	9.86e-22
Senp5	SUMO/sentrin specific peptidase 5	9.9e-22
Gpr1	G protein-coupled receptor 1	1e-21
Syn3	synapsin III	1.01e-21
Mettl4	methyltransferase like 4	1.03e-21
Pld2	phospholipase D2	1.03e-21
Fkbp6	FK506 binding protein 6	1.04e-21
Slc2a5	solute carrier family 2 (facilitated glucose transporter), member 5	1.05e-21
Mep1a	meprin 1 alpha	1.07e-21
Dmrt3	doublesex and mab-3 related transcription factor 3	1.08e-21
Fzd1	frizzled homolog 1 (Drosophila)	1.08e-21
Gpr143	G protein-coupled receptor 143	1.12e-21
Lsm12	LSM12 homolog (S. cerevisiae)	1.13e-21
Ctnna2	catenin (cadherin associated protein), alpha 2	1.14e-21
Per3	period homolog 3 (Drosophila)	1.15e-21
Lyn	Yamaguchi sarcoma viral (v-yes-1) oncogene homolog	1.17e-21
Mapt	microtubule-associated protein tau	1.17e-21
Nup133	nucleoporin 133	1.17e-21
Slamf7	SLAM family member 7	1.2e-21
Lhfpl2	lipoma HMGIC fusion partner-like 2	1.22e-21
Sema6b	sema domain, transmembrane domain (TM), and cytoplasmic domain, (semaphorin) 6B	1.22e-21
Ltk	leukocyte tyrosine kinase	1.24e-21
Tbc1d2b	TBC1 domain family, member 2B	1.26e-21
Msrb2	methionine sulfoxide reductase B2	1.28e-21
Ptgis	prostaglandin I2 (prostacyclin) synthase	1.28e-21
Junb	Jun-B oncogene	1.32e-21
Pla1a	phospholipase A1 member A	1.34e-21
Ralgps1	Ral GEF with PH domain and SH3 binding motif 1	1.35e-21
Ppm1f	protein phosphatase 1F (PP2C domain containing)	1.4e-21
Irf1	interferon regulatory factor 1	1.47e-21
Mkrn1	makorin, ring finger protein, 1	1.48e-21
Arl8b	ADP-ribosylation factor-like 8B	1.51e-21
Rabl2a	RAB, member of RAS oncogene family-like 2A	1.53e-21
Pcdh20	protocadherin 20	1.58e-21
Dgkq	diacylglycerol kinase, theta	1.59e-21
Mett10d	methyltransferase 10 domain containing	1.59e-21
Crtam	cytotoxic and regulatory T cell molecule	1.6e-21
Cd244	CD244 natural killer cell receptor 2B4	1.68e-21
Sstr1	somatostatin receptor 1	1.7e-21
Mpo	myeloperoxidase	1.72e-21
Ppm1h	protein phosphatase 1H (PP2C domain containing)	1.72e-21
Stk24	serine/threonine kinase 24 (STE20 homolog, yeast)	1.73e-21
Wdr31	WD repeat domain 31	1.73e-21
Tyrobp	TYRO protein tyrosine kinase binding protein	1.76e-21
Batf2	basic leucine zipper transcription factor, ATF-like 2	1.83e-21
Cd48	CD48 antigen	1.83e-21
Slc6a13	solute carrier family 6 (neurotransmitter transporter, GABA), member 13	1.89e-21
Papolb	poly (A) polymerase beta (testis specific)	1.92e-21
Ribc1	RIB43A domain with coiled-coils 1	1.95e-21
Hk2	hexokinase 2	2.02e-21
Vps37c	vacuolar protein sorting 37C (yeast)	2.02e-21
Odz1	odd Oz/ten-m homolog 1 (Drosophila)	2.08e-21
Sec24d	Sec24 related gene family, member D (S. cerevisiae)	2.1e-21
Rapgef1	Rap guanine nucleotide exchange factor (GEF) 1	2.13e-21
Twsg1	twisted gastrulation homolog 1 (Drosophila)	2.21e-21
Hars2	histidyl-tRNA synthetase 2, mitochondrial (putative)	2.24e-21
Capsl	calcyphosine-like	2.25e-21
Padi2	peptidyl arginine deiminase, type II	2.29e-21
Cyp17a1	cytochrome P450, family 17, subfamily a, polypeptide 1	2.33e-21
Dsc2	desmocollin 2	2.35e-21
Tm6sf1	transmembrane 6 superfamily member 1	2.37e-21
Atpaf1	ATP synthase mitochondrial F1 complex assembly factor 1	2.45e-21
Oxtr	oxytocin receptor	2.47e-21
Pak4	p21 (CDKN1A)-activated kinase 4	2.5e-21
Nat12	N-acetyltransferase 12	2.61e-21
Rfx4	regulatory factor X, 4 (influences HLA class II expression)	2.61e-21
Mmd2	monocyte to macrophage differentiation-associated 2	2.63e-21
Sh3pxd2a	SH3 and PX domains 2A	2.7e-21
Dnajc10	DnaJ (Hsp40) homolog, subfamily C, member 10	2.72e-21
Lama1	laminin, alpha 1	2.73e-21
Myh9	myosin, heavy polypeptide 9, non-muscle	2.75e-21
Hist1h3g	histone cluster 1, H3g	2.81e-21
Nxph2	neurexophilin 2	2.82e-21
Rac2	RAS-related C3 botulinum substrate 2	2.82e-21
Man1a2	mannosidase, alpha, class 1A, member 2	2.83e-21
Zdhhc9	zinc finger, DHHC domain containing 9	3.01e-21
Wdr63	WD repeat domain 63	3.02e-21
Syvn1	synovial apoptosis inhibitor 1, synoviolin	3.03e-21
Lamp3	lysosomal-associated membrane protein 3	3.09e-21
Tnfaip8	tumor necrosis factor, alpha-induced protein 8	3.15e-21
Clec12a	C-type lectin domain family 12, member a	3.18e-21
Myo1f	myosin IF	3.19e-21
Wnt1	wingless-related MMTV integration site 1	3.22e-21
Rfwd2	ring finger and WD repeat domain 2	3.25e-21
Pknox1	Pbx/knotted 1 homeobox	3.27e-21
Mertk	c-mer proto-oncogene tyrosine kinase	3.32e-21
Morc4	microrchidia 4	3.33e-21
Pgap1	post-GPI attachment to proteins 1	3.35e-21
Golph3l	golgi phosphoprotein 3-like	3.45e-21
Dmrtc2	doublesex and mab-3 related transcription factor like family C2	3.47e-21
Nol10	nucleolar protein 10	3.48e-21
Il10ra	interleukin 10 receptor, alpha	3.49e-21
Mdfi	MyoD family inhibitor	3.5e-21
Mpv17l	Mpv17 transgene, kidney disease mutant-like	3.53e-21
L3mbtl2	l(3)mbt-like 2 (Drosophila)	3.61e-21
Xylt1	xylosyltransferase 1	3.64e-21
Slc39a13	solute carrier family 39 (metal ion transporter), member 13	3.67e-21
Osbpl7	oxysterol binding protein-like 7	3.7e-21
Elovl7	ELOVL family member 7, elongation of long chain fatty acids (yeast)	3.77e-21
Fam78b	family with sequence similarity 78, member B	3.87e-21
Psmb4	proteasome (prosome, macropain) subunit, beta type 4	3.93e-21
Slc5a11	solute carrier family 5 (sodium/glucose cotransporter), member 11	3.93e-21
Fbxo46	F-box protein 46	3.94e-21
Sox4	SRY-box containing gene 4	3.94e-21
Prkd3	protein kinase D3	3.97e-21
Prr13	proline rich 13	3.97e-21
Letm2	leucine zipper-EF-hand containing transmembrane protein 2	3.98e-21
Tbc1d9b	TBC1 domain family, member 9B	4.02e-21
Btbd16	BTB (POZ) domain containing 16	4.06e-21
Rufy1	RUN and FYVE domain containing 1	4.1e-21
Pcdhb6	protocadherin beta 6	4.11e-21
Hsfy2	heat shock transcription factor, Y linked 2	4.3e-21
Snai3	snail homolog 3 (Drosophila)	4.41e-21
Syngr4	synaptogyrin 4	4.48e-21
Dpysl3	dihydropyrimidinase-like 3	4.55e-21
Fosl2	fos-like antigen 2	4.77e-21
Slc10a3	solute carrier family 10 (sodium/bile acid cotransporter family), member 3	4.81e-21
Ssh3	slingshot homolog 3 (Drosophila)	4.83e-21
Serpinb13	serine (or cysteine) peptidase inhibitor, clade B (ovalbumin), member 13	4.87e-21
Cd300lf	CD300 antigen like family member F	4.89e-21
Art5	---	4.92e-21
Anxa9	annexin A9	4.95e-21
Gab1	growth factor receptor bound protein 2-associated protein 1	5e-21
Ccr7	chemokine (C-C motif) receptor 7	5.02e-21
Cntd1	cyclin N-terminal domain containing 1	5.32e-21
Foxe3	forkhead box E3	5.33e-21
Rhpn1	rhophilin, Rho GTPase binding protein 1	5.42e-21
Hoxc10	homeo box C10	5.51e-21
Wdr64	WD repeat domain 64	5.54e-21
Fam83f	family with sequence similarity 83, member F	5.55e-21
Zbp1	Z-DNA binding protein 1	5.6e-21
Elavl3	ELAV (embryonic lethal, abnormal vision, Drosophila)-like 3 (Hu antigen C)	5.65e-21
Mtnr1a	melatonin receptor 1A	5.72e-21
Gpr158	G protein-coupled receptor 158	5.81e-21
Ccdc120	coiled-coil domain containing 120	5.84e-21
Rmnd5b	required for meiotic nuclear division 5 homolog B (S. cerevisiae)	5.9e-21
Foxp3	forkhead box P3	6.11e-21
Lrrc8e	leucine rich repeat containing 8 family, member E	6.23e-21
Etv6	ets variant gene 6 (TEL oncogene)	6.38e-21
Gcm1	glial cells missing homolog 1 (Drosophila)	6.5e-21
Lrrc57	leucine rich repeat containing 57	6.53e-21
Per2	period homolog 2 (Drosophila)	6.62e-21
Skp1a	S-phase kinase-associated protein 1A	6.8e-21
Mapk8ip3	mitogen-activated protein kinase 8 interacting protein 3	7e-21
Serpinb7	serine (or cysteine) peptidase inhibitor, clade B, member 7	7.05e-21
Trpv4	transient receptor potential cation channel, subfamily V, member 4	7.08e-21
Pex11b	---	7.09e-21
Kctd10	potassium channel tetramerisation domain containing 10	7.1e-21
Magee1	melanoma antigen, family E, 1	7.15e-21
Zpld1	zona pellucida like domain containing 1	7.18e-21
Cdh16	cadherin 16	7.26e-21
Prap1	proline-rich acidic protein 1	7.49e-21
Arhgap24	Rho GTPase activating protein 24	7.56e-21
Tdrd1	tudor domain containing 1	7.59e-21
Lrp12	low density lipoprotein-related protein 12	7.76e-21
Ms4a5	membrane-spanning 4-domains, subfamily A, member 5	7.82e-21
Lce1c	late cornified envelope 1C	8.1e-21
Mtcp1	mature T-cell proliferation 1	8.18e-21
Slc6a2	solute carrier family 6 (neurotransmitter transporter, noradrenalin), member 2	8.37e-21
Zc3h11a	zinc finger CCCH type containing 11A	8.4e-21
Atoh7	atonal homolog 7 (Drosophila)	8.48e-21
Pkn2	protein kinase N2	8.55e-21
Dysf	dysferlin	8.59e-21
Ppp2r2c	protein phosphatase 2 (formerly 2A), regulatory subunit B (PR 52), gamma isoform	8.7e-21
Pcdh10	protocadherin 10	8.82e-21
Arid4b	AT rich interactive domain 4B (RBP1-like)	9e-21
Npl	N-acetylneuraminate pyruvate lyase	9.23e-21
Tlx3	T-cell leukemia, homeobox 3	9.34e-21
Polr2a	polymerase (RNA) II (DNA directed) polypeptide A	9.4e-21
Mtmr1	myotubularin related protein 1	9.58e-21
Mobkl2c	MOB1, Mps One Binder kinase activator-like 2C (yeast)	9.66e-21
Slc29a3	solute carrier family 29 (nucleoside transporters), member 3	9.7e-21
Efhb	EF hand domain family, member B	9.92e-21
Akap9	A kinase (PRKA) anchor protein (yotiao) 9	9.99e-21
Asb13	ankyrin repeat and SOCS box-containing 13	1.01e-20
Ythdf1	YTH domain family 1	1.02e-20
Pnma3	paraneoplastic antigen MA3	1.02e-20
Gzma	granzyme A	1.04e-20
Arhgap25	Rho GTPase activating protein 25	1.04e-20
Tmem150	transmembrane protein 150	1.07e-20
Cdh23	cadherin 23 (otocadherin)	1.09e-20
Htra3	HtrA serine peptidase 3	1.13e-20
Rnf135	ring finger protein 135	1.14e-20
Habp2	hyaluronic acid binding protein 2	1.15e-20
C2	complement component 2 (within H-2S)	1.16e-20
Myo10	myosin X	1.18e-20
Ly6k	lymphocyte antigen 6 complex, locus K	1.19e-20
Cmtm6	CKLF-like MARVEL transmembrane domain containing 6	1.21e-20
Mxd3	Max dimerization protein 3	1.21e-20
Fbn1	fibrillin 1	1.22e-20
Lmbrd2	LMBR1 domain containing 2	1.24e-20
Ywhaz	tyrosine 3-monooxygenase/tryptophan 5-monooxygenase activation protein, zeta polypeptide	1.26e-20
Mrp63	mitochondrial ribosomal protein 63	1.27e-20
Tnrc6a	trinucleotide repeat containing 6a	1.31e-20
Arl8a	ADP-ribosylation factor-like 8A	1.31e-20
Wdr23	WD repeat domain 23	1.36e-20
Idi2	isopentenyl-diphosphate delta isomerase 2	1.37e-20
Slc38a6	solute carrier family 38, member 6	1.38e-20
Atp6v0e	ATPase, H+ transporting, lysosomal V0 subunit E	1.39e-20
Ush1c	Usher syndrome 1C homolog (human)	1.4e-20
Susd4	sushi domain containing 4	1.4e-20
Akna	AT-hook transcription factor	1.41e-20
Txk	TXK tyrosine kinase	1.46e-20
Rap2b	RAP2B, member of RAS oncogene family	1.47e-20
Fbxo6	F-box protein 6	1.47e-20
Baiap2	brain-specific angiogenesis inhibitor 1-associated protein 2	1.47e-20
Gatad2b	GATA zinc finger domain containing 2B	1.53e-20
Tgfbr1	transforming growth factor, beta receptor I	1.56e-20
Ugt3a2	UDP glycosyltransferases 3 family, polypeptide A2	1.57e-20
Scnn1b	sodium channel, nonvoltage-gated 1 beta	1.57e-20
Obscn	obscurin, cytoskeletal calmodulin and titin-interacting RhoGEF	1.57e-20
Igsf11	immunoglobulin superfamily, member 11	1.57e-20
Mier2	mesoderm induction early response 1, family member 2	1.61e-20
Tbx4	T-box 4	1.65e-20
Hdgfl1	hepatoma derived growth factor-like 1	1.65e-20
Vps53	vacuolar protein sorting 53 (yeast)	1.7e-20
Add2	adducin 2 (beta)	1.71e-20
Dnm3	dynamin 3	1.71e-20
Slc44a4	solute carrier family 44, member 4	1.73e-20
Nrxn1	neurexin I	1.74e-20
Dad1	defender against cell death 1	1.76e-20
Wnt9b	wingless-type MMTV integration site 9B	1.78e-20
Pcdh17	protocadherin 17	1.78e-20
Tspan15	tetraspanin 15	1.79e-20
Bnc2	basonuclin 2	1.79e-20
Osbpl10	oxysterol binding protein-like 10	1.8e-20
Grm8	glutamate receptor, metabotropic 8	1.83e-20
Ell2	elongation factor RNA polymerase II 2	1.86e-20
Frs3	fibroblast growth factor receptor substrate 3	1.88e-20
Esx1	extraembryonic, spermatogenesis, homeobox 1	1.89e-20
Mboat1	membrane bound O-acyltransferase domain containing 1	1.9e-20
Vash1	vasohibin 1	1.91e-20
Cope	coatomer protein complex, subunit epsilon	1.94e-20
Mpzl1	myelin protein zero-like 1	1.95e-20
Atg9b	ATG9 autophagy related 9 homolog B (S. cerevisiae)	1.97e-20
Atp6v0d2	ATPase, H+ transporting, lysosomal V0 subunit D2	2e-20
Card14	caspase recruitment domain family, member 14	2.03e-20
Mrap	melanocortin 2 receptor accessory protein	2.05e-20
Oprk1	opioid receptor, kappa 1	2.1e-20
Rassf2	Ras association (RalGDS/AF-6) domain family member 2	2.11e-20
Gabrg2	gamma-aminobutyric acid (GABA) A receptor, subunit gamma 2	2.12e-20
Krtap3-3	keratin associated protein 3-3	2.16e-20
Il5	interleukin 5	2.19e-20
Xdh	xanthine dehydrogenase	2.22e-20
Impg2	interphotoreceptor matrix proteoglycan 2	2.31e-20
Spock1	sparc/osteonectin, cwcv and kazal-like domains proteoglycan 1	2.33e-20
Tor1aip1	torsin A interacting protein 1	2.34e-20
Kcnv1	potassium channel, subfamily V, member 1	2.34e-20
Vrk2	vaccinia related kinase 2	2.37e-20
Sox12	SRY-box containing gene 12	2.39e-20
Stk17b	serine/threonine kinase 17b (apoptosis-inducing)	2.43e-20
Prkg1	protein kinase, cGMP-dependent, type I	2.43e-20
Frk	fyn-related kinase	2.49e-20
Otos	otospiralin	2.53e-20
R3hdm2	R3H domain containing 2	2.63e-20
Ttc16	tetratricopeptide repeat domain 16	2.65e-20
Nr1d1	nuclear receptor subfamily 1, group D, member 1	2.68e-20
Sp1	trans-acting transcription factor 1	2.72e-20
G6pc	glucose-6-phosphatase, catalytic	2.72e-20
Cxcl3	chemokine (C-X-C motif) ligand 3	2.72e-20
Nfyc	nuclear transcription factor-Y gamma	2.73e-20
Dnajb5	DnaJ (Hsp40) homolog, subfamily B, member 5	2.76e-20
Pex5l	peroxisomal biogenesis factor 5-like	2.91e-20
Islr2	immunoglobulin superfamily containing leucine-rich repeat 2	3e-20
Gcg	glucagon	3.14e-20
Nme5	non-metastatic cells 5, protein expressed in (nucleoside-diphosphate kinase)	3.18e-20
Cmtm4	CKLF-like MARVEL transmembrane domain containing 4	3.18e-20
Csf3	colony stimulating factor 3 (granulocyte)	3.26e-20
Ctsk	cathepsin K	3.28e-20
Pla2g3	phospholipase A2, group III	3.28e-20
Gad1	glutamic acid decarboxylase 1	3.31e-20
Cuta	cutA divalent cation tolerance homolog (E. coli)	3.35e-20
Myo5b	myosin VB	3.37e-20
Glt8d2	glycosyltransferase 8 domain containing 2	3.4e-20
Npc2	Niemann Pick type C2	3.42e-20
Cd4	CD4 antigen	3.47e-20
Atxn2l	ataxin 2-like	3.47e-20
Ubd	ubiquitin D	3.5e-20
Smg6	Smg-6 homolog, nonsense mediated mRNA decay factor (C. elegans)	3.73e-20
Dst	dystonin	3.76e-20
Kcnj11	potassium inwardly rectifying channel, subfamily J, member 11	3.78e-20
Mbtps2	membrane-bound transcription factor peptidase, site 2	3.79e-20
Htr1d	5-hydroxytryptamine (serotonin) receptor 1D	3.83e-20
Fam19a2	family with sequence similarity 19, member A2	3.83e-20
Caskin1	CASK interacting protein 1	3.84e-20
Itpk1	inositol 1,3,4-triphosphate 5/6 kinase	3.88e-20
Ly6g6c	lymphocyte antigen 6 complex, locus G6C	3.96e-20
Mov10l1	Moloney leukemia virus 10-like 1	4.08e-20
Spast	spastin	4.13e-20
Scube3	signal peptide, CUB domain, EGF-like 3	4.26e-20
Crygb	crystallin, gamma B	4.3e-20
Pitx3	paired-like homeodomain transcription factor 3	4.33e-20
Susd3	sushi domain containing 3	4.36e-20
Ptpn1	protein tyrosine phosphatase, non-receptor type 1	4.37e-20
Cntn3	contactin 3	4.39e-20
Wnt2	wingless-related MMTV integration site 2	4.4e-20
Parva	parvin, alpha	4.47e-20
Crem	cAMP responsive element modulator	4.55e-20
Extl3	exostoses (multiple)-like 3	4.57e-20
Rbks	ribokinase	4.6e-20
Fxyd7	FXYD domain-containing ion transport regulator 7	4.63e-20
Rbms2	RNA binding motif, single stranded interacting protein 2	4.75e-20
Rnf152	ring finger protein 152	4.86e-20
Crybb3	crystallin, beta B3	4.94e-20
Sgip1	SH3-domain GRB2-like (endophilin) interacting protein 1	4.99e-20
Mta1	metastasis associated 1	5.01e-20
Cox4nb	COX4 neighbor	5.12e-20
Rufy2	RUN and FYVE domain-containing 2	5.27e-20
Kcng3	potassium voltage-gated channel, subfamily G, member 3	5.29e-20
Grin2c	glutamate receptor, ionotropic, NMDA2C (epsilon 3)	5.31e-20
Oxsr1	oxidative-stress responsive 1	5.45e-20
Ggn	gametogenetin	5.45e-20
Krt12	keratin 12	5.57e-20
Per1	period homolog 1 (Drosophila)	5.57e-20
Sdc1	syndecan 1	5.77e-20
Adamts13	a disintegrin-like and metallopeptidase (reprolysin type) with thrombospondin type 1 motif, 13	6.05e-20
Phf12	PHD finger protein 12	6.15e-20
Sh3gl1	SH3-domain GRB2-like 1	6.17e-20
Casp7	caspase 7	6.32e-20
Cd109	CD109 antigen	6.44e-20
Vezt	vezatin, adherens junctions transmembrane protein	6.47e-20
Epor	erythropoietin receptor	6.49e-20
Itga2	integrin alpha 2	6.49e-20
Foxh1	forkhead box H1	6.58e-20
B3galt4	UDP-Gal:betaGlcNAc beta 1,3-galactosyltransferase, polypeptide 4	6.6e-20
Cdh5	cadherin 5	6.63e-20
Gpr128	G protein-coupled receptor 128	6.75e-20
Gabra4	gamma-aminobutyric acid (GABA) A receptor, subunit alpha 4	6.88e-20
Ocrl	oculocerebrorenal syndrome of Lowe	6.88e-20
Adipor2	adiponectin receptor 2	6.91e-20
Pdcl	phosducin-like	6.91e-20
Tmbim1	transmembrane BAX inhibitor motif containing 1	6.93e-20
Prkdc	protein kinase, DNA activated, catalytic polypeptide	6.99e-20
Ralbp1	ralA binding protein 1	7.03e-20
Gipc1	GIPC PDZ domain containing family, member 1	7.21e-20
Ppfia3	protein tyrosine phosphatase, receptor type, f polypeptide (PTPRF), interacting protein (liprin), alpha 3	7.24e-20
Dkk3	dickkopf homolog 3 (Xenopus laevis)	7.55e-20
Tssk1	testis-specific serine kinase 1	7.58e-20
Flt1	FMS-like tyrosine kinase 1	7.8e-20
Cnksr2	connector enhancer of kinase suppressor of Ras 2	7.82e-20
Ntsr2	neurotensin receptor 2	7.87e-20
Bai3	brain-specific angiogenesis inhibitor 3	7.89e-20
Mllt3	myeloid/lymphoid or mixed-lineage leukemia (trithorax homolog, Drosophila); translocated to, 3	7.93e-20
Ccl3	chemokine (C-C motif) ligand 3	8.06e-20
Slc32a1	solute carrier family 32 (GABA vesicular transporter), member 1	8.08e-20
Tlr6	toll-like receptor 6	8.12e-20
Dnajc4	DnaJ (Hsp40) homolog, subfamily C, member 4	8.22e-20
Gpr4	G protein-coupled receptor 4	8.31e-20
Thbs4	thrombospondin 4	8.37e-20
Slc26a3	solute carrier family 26, member 3	8.41e-20
Atp6v1b1	ATPase, H+ transporting, lysosomal V1 subunit B1	8.45e-20
Foxp4	forkhead box P4	8.52e-20
Fam65a	family with sequence similarity 65, member A	8.54e-20
Mrgprx1	MAS-related GPR, member X1	8.56e-20
Omg	oligodendrocyte myelin glycoprotein	8.58e-20
Lphn1	latrophilin 1	8.63e-20
Ccl4	chemokine (C-C motif) ligand 4	8.68e-20
Ptplad2	protein tyrosine phosphatase-like A domain containing 2	8.77e-20
Apbb2	amyloid beta (A4) precursor protein-binding, family B, member 2	8.8e-20
Adrb3	adrenergic receptor, beta 3	8.81e-20
Fn3k	fructosamine 3 kinase	8.9e-20
Grap2	GRB2-related adaptor protein 2	9.02e-20
Mrps10	mitochondrial ribosomal protein S10	9.11e-20
Lhx3	LIM homeobox protein 3	9.2e-20
Gpr3	G-protein coupled receptor 3	9.29e-20
Raet1e	retinoic acid early transcript 1E	9.42e-20
Trim14	tripartite motif-containing 14	9.43e-20
Dixdc1	DIX domain containing 1	9.57e-20
Alpk3	alpha-kinase 3	9.67e-20
Dab2	disabled homolog 2 (Drosophila)	9.88e-20
Psme3	proteaseome (prosome, macropain) 28 subunit, 3	9.95e-20
Apc2	adenomatosis polyposis coli 2	9.96e-20
Oxnad1	oxidoreductase NAD-binding domain containing 1	9.99e-20
Tg	thyroglobulin	1.02e-19
Cmklr1	chemokine-like receptor 1	1.04e-19
Ethe1	ethylmalonic encephalopathy 1	1.04e-19
Cend1	cell cycle exit and neuronal differentiation 1	1.05e-19
Gmcl1	germ cell-less homolog 1 (Drosophila)	1.05e-19
Grin1	glutamate receptor, ionotropic, NMDA1 (zeta 1)	1.05e-19
Gja1	gap junction protein, alpha 1	1.06e-19
Mark2	MAP/microtubule affinity-regulating kinase 2	1.09e-19
Elavl4	ELAV (embryonic lethal, abnormal vision, Drosophila)-like 4 (Hu antigen D)	1.11e-19
Taf5l	TAF5-like RNA polymerase II, p300/CBP-associated factor (PCAF)-associated factor	1.14e-19
C9	complement component 9	1.15e-19
Dpp6	dipeptidylpeptidase 6	1.16e-19
Slc39a12	solute carrier family 39 (zinc transporter), member 12	1.16e-19
Sprr1a	small proline-rich protein 1A	1.16e-19
Itch	itchy, E3 ubiquitin protein ligase	1.17e-19
Barhl1	BarH-like 1 (Drosophila)	1.17e-19
Slc22a13	solute carrier family 22 (organic cation transporter), member 13	1.19e-19
Kcnj15	potassium inwardly-rectifying channel, subfamily J, member 15	1.2e-19
Mid2	midline 2	1.24e-19
Nfe2l1	nuclear factor, erythroid derived 2,-like 1	1.25e-19
Myo3b	myosin IIIB	1.27e-19
Mgst3	microsomal glutathione S-transferase 3	1.29e-19
Rbbp9	retinoblastoma binding protein 9	1.29e-19
Tnfrsf4	tumor necrosis factor receptor superfamily, member 4	1.32e-19
Atp6v0d1	ATPase, H+ transporting, lysosomal V0 subunit D1	1.32e-19
Il22ra2	interleukin 22 receptor, alpha 2	1.34e-19
Pde4dip	phosphodiesterase 4D interacting protein (myomegalin)	1.34e-19
C1qb	complement component 1, q subcomponent, beta polypeptide	1.35e-19
Cav3	caveolin 3	1.37e-19
Rpl3l	ribosomal protein L3-like	1.37e-19
Krt2	keratin 2	1.38e-19
Kcnma1	potassium large conductance calcium-activated channel, subfamily M, alpha member 1	1.38e-19
Pml	promyelocytic leukemia	1.39e-19
Lrrc18	leucine rich repeat containing 18	1.41e-19
Kcnmb2	potassium large conductance calcium-activated channel, subfamily M, beta member 2	1.41e-19
Il1rn	interleukin 1 receptor antagonist	1.41e-19
Flt3	FMS-like tyrosine kinase 3	1.44e-19
Git2	G protein-coupled receptor kinase-interactor 2	1.44e-19
Mfsd2	major facilitator superfamily domain containing 2	1.45e-19
Rab6b	RAB6B, member RAS oncogene family	1.46e-19
Hfe2	hemochromatosis type 2 (juvenile) (human homolog)	1.48e-19
Ctso	cathepsin O	1.49e-19
Pias3	protein inhibitor of activated STAT 3	1.51e-19
Sumo2	SMT3 suppressor of mif two 3 homolog 2 (yeast)	1.54e-19
Scn7a	sodium channel, voltage-gated, type VII, alpha	1.56e-19
Mark4	MAP/microtubule affinity-regulating kinase 4	1.56e-19
Mfap3l	microfibrillar-associated protein 3-like	1.58e-19
Mkrn3	makorin, ring finger protein, 3	1.58e-19
Plekhg6	pleckstrin homology domain containing, family G (with RhoGef domain) member 6	1.58e-19
Tll1	tolloid-like	1.58e-19
Xkr5	X Kell blood group precursor-related family, member 5	1.58e-19
Anapc1	anaphase promoting complex subunit 1	1.61e-19
Wdr45l	Wdr45 like	1.64e-19
Irx5	Iroquois related homeobox 5 (Drosophila)	1.64e-19
Hmgb1	high mobility group box 1	1.65e-19
Ctse	cathepsin E	1.66e-19
Gpx6	glutathione peroxidase 6	1.66e-19
Nanos3	nanos homolog 3 (Drosophila)	1.67e-19
Smarcd1	SWI/SNF related, matrix associated, actin dependent regulator of chromatin, subfamily d, member 1	1.69e-19
Mlx	MAX-like protein X	1.7e-19
Tm7sf2	transmembrane 7 superfamily member 2	1.71e-19
Slc15a3	solute carrier family 15, member 3	1.75e-19
Apbb1	amyloid beta (A4) precursor protein-binding, family B, member 1	1.76e-19
Setd8	SET domain containing (lysine methyltransferase) 8	1.77e-19
Dbp	D site albumin promoter binding protein	1.8e-19
Copz2	coatomer protein complex, subunit zeta 2	1.84e-19
Freq	frequenin homolog (Drosophila)	1.87e-19
Pkd2l2	polycystic kidney disease 2-like 2	1.88e-19
Lad1	ladinin	1.9e-19
Creb3l1	cAMP responsive element binding protein 3-like 1	1.91e-19
Pou2f3	POU domain, class 2, transcription factor 3	1.93e-19
Crtc3	CREB regulated transcription coactivator 3	1.93e-19
Arhgap19	Rho GTPase activating protein 19	1.93e-19
Kcnab1	potassium voltage-gated channel, shaker-related subfamily, beta member 1	1.95e-19
Gpr63	G protein-coupled receptor 63	1.98e-19
Cd207	CD207 antigen	1.98e-19
Cd300lg	CD300 antigen like family member G	2.08e-19
Slc6a6	solute carrier family 6 (neurotransmitter transporter, taurine), member 6	2.12e-19
Hhip	Hedgehog-interacting protein	2.17e-19
Cntnap2	contactin associated protein-like 2	2.18e-19
Cxcl16	chemokine (C-X-C motif) ligand 16	2.19e-19
Neto1	neuropilin (NRP) and tolloid (TLL)-like 1	2.22e-19
Serinc5	serine incorporator 5	2.37e-19
Podn	podocan	2.4e-19
Ereg	epiregulin	2.42e-19
Strn	striatin, calmodulin binding protein	2.44e-19
Commd5	COMM domain containing 5	2.44e-19
Abcd2	ATP-binding cassette, sub-family D (ALD), member 2	2.44e-19
Ywhag	tyrosine 3-monooxygenase/tryptophan 5-monooxygenase activation protein, gamma polypeptide	2.45e-19
Nmi	N-myc (and STAT) interactor	2.46e-19
Odz4	odd Oz/ten-m homolog 4 (Drosophila)	2.51e-19
Dnajc5b	DnaJ (Hsp40) homolog, subfamily C, member 5 beta	2.51e-19
Sufu	suppressor of fused homolog (Drosophila)	2.55e-19
Zc3h12a	zinc finger CCCH type containing 12A	2.59e-19
Rgr	retinal G protein coupled receptor	2.61e-19
Arhgap29	Rho GTPase activating protein 29	2.63e-19
Sycp3	synaptonemal complex protein 3	2.64e-19
Kremen1	kringle containing transmembrane protein 1	2.65e-19
Trpv3	transient receptor potential cation channel, subfamily V, member 3	2.67e-19
Rassf3	Ras association (RalGDS/AF-6) domain family member 3	2.67e-19
Nphp1	nephronophthisis 1 (juvenile) homolog (human)	2.67e-19
Lsm14a	LSM14 homolog A (SCD6, S. cerevisiae)	2.67e-19
Slc6a11	solute carrier family 6 (neurotransmitter transporter, GABA), member 11	2.7e-19
Slitrk1	SLIT and NTRK-like family, member 1	2.71e-19
Slco2b1	solute carrier organic anion transporter family, member 2b1	2.75e-19
Cep135	centrosomal protein 135	2.79e-19
Nppb	natriuretic peptide precursor type B	2.86e-19
Foxc1	forkhead box C1	2.88e-19
Otud5	OTU domain containing 5	2.91e-19
Anxa7	annexin A7	2.92e-19
Ednra	endothelin receptor type A	2.95e-19
Cd52	CD52 antigen	2.96e-19
Hist1h3a	histone cluster 1, H3a	2.97e-19
Med12	mediator of RNA polymerase II transcription, subunit 12 homolog (yeast)	3.02e-19
Rab35	RAB35, member RAS oncogene family	3.05e-19
Setd5	SET domain containing 5	3.09e-19
Rap1b	RAS related protein 1b	3.09e-19
Madcam1	mucosal vascular addressin cell adhesion molecule 1	3.1e-19
Hrh3	histamine receptor H3	3.12e-19
Sptlc2	serine palmitoyltransferase, long chain base subunit 2	3.13e-19
Olfm1	olfactomedin 1	3.19e-19
Sidt1	SID1 transmembrane family, member 1	3.19e-19
Mesdc1	mesoderm development candidate 1	3.23e-19
Zscan2	zinc finger and SCAN domain containing 2	3.23e-19
Krtcap3	keratinocyte associated protein 3	3.26e-19
Nek9	NIMA (never in mitosis gene a)-related expressed kinase 9	3.27e-19
Ston2	stonin 2	3.29e-19
Mxra8	matrix-remodelling associated 8	3.3e-19
Acp5	acid phosphatase 5, tartrate resistant	3.32e-19
Slc10a1	solute carrier family 10 (sodium/bile acid cotransporter family), member 1	3.34e-19
Rhbdd1	rhomboid domain containing 1	3.34e-19
Gna12	guanine nucleotide binding protein, alpha 12	3.37e-19
Tmprss13	transmembrane protease, serine 13	3.38e-19
Fam123b	family with sequence similarity 123, member B	3.39e-19
Slc23a2	solute carrier family 23 (nucleobase transporters), member 2	3.42e-19
Clec4g	C-type lectin domain family 4, member g	3.5e-19
Tmem9b	TMEM9 domain family, member B	3.54e-19
Tdo2	tryptophan 2,3-dioxygenase	3.59e-19
Tram1	translocating chain-associating membrane protein 1	3.6e-19
Maml1	mastermind like 1 (Drosophila)	3.67e-19
Ell	elongation factor RNA polymerase II	3.68e-19
Slc26a1	solute carrier family 26 (sulfate transporter), member 1	3.72e-19
Phyhipl	phytanoyl-CoA hydroxylase interacting protein-like	3.72e-19
Tbl1xr1	transducin (beta)-like 1X-linked receptor 1	3.73e-19
Cdkn1a	cyclin-dependent kinase inhibitor 1A (P21)	3.73e-19
Fshb	follicle stimulating hormone beta	3.77e-19
Myf6	myogenic factor 6	3.78e-19
Ergic1	endoplasmic reticulum-golgi intermediate compartment (ERGIC) 1	3.84e-19
Col6a3	collagen, type VI, alpha 3	3.87e-19
Grwd1	glutamate-rich WD repeat containing 1	3.91e-19
Hmgcs2	3-hydroxy-3-methylglutaryl-Coenzyme A synthase 2	3.91e-19
Kdelr2	KDEL (Lys-Asp-Glu-Leu) endoplasmic reticulum protein retention receptor 2	4.01e-19
Glipr1l2	GLI pathogenesis-related 1 like 2	4.01e-19
Taok1	TAO kinase 1	4.04e-19
Aoc2	amine oxidase, copper containing 2 (retina-specific)	4.09e-19
Slc22a1	solute carrier family 22 (organic cation transporter), member 1	4.11e-19
Ift81	intraflagellar transport 81 homolog (Chlamydomonas)	4.31e-19
Evc	Ellis van Creveld gene homolog (human)	4.34e-19
Exoc8	exocyst complex component 8	4.34e-19
Glp2r	glucagon-like peptide 2 receptor	4.34e-19
Napsa	napsin A aspartic peptidase	4.34e-19
Cd80	---	4.4e-19
Cbll1	Casitas B-lineage lymphoma-like 1	4.43e-19
Dyrk2	dual-specificity tyrosine-(Y)-phosphorylation regulated kinase 2	4.49e-19
Emp2	epithelial membrane protein 2	4.49e-19
Csnk1g1	casein kinase 1, gamma 1	4.66e-19
Tnfaip8l1	tumor necrosis factor, alpha-induced protein 8-like 1	4.66e-19
Stard6	StAR-related lipid transfer (START) domain containing 6	4.71e-19
Tcea3	transcription elongation factor A (SII), 3	4.75e-19
Cntn2	contactin 2	4.79e-19
Dgcr8	DiGeorge syndrome critical region gene 8	4.83e-19
Lipa	lysosomal acid lipase A	4.83e-19
Aldh1l2	aldehyde dehydrogenase 1 family, member L2	4.88e-19
Trps1	trichorhinophalangeal syndrome I (human)	4.9e-19
Tinag	tubulointerstitial nephritis antigen	4.95e-19
Kng1	kininogen 1	4.96e-19
Sgol1	shugoshin-like 1 (S. pombe)	4.98e-19
Trpa1	transient receptor potential cation channel, subfamily A, member 1	4.99e-19
Apob48r	apolipoprotein B48 receptor	5.01e-19
Adora2a	adenosine A2a receptor	5.05e-19
Bcmo1	beta-carotene 15,15'-monooxygenase	5.08e-19
Kctd18	potassium channel tetramerisation domain containing 18	5.16e-19
Dach2	dachshund 2 (Drosophila)	5.2e-19
Lypd4	Ly6/Plaur domain containing 4	5.21e-19
Pold3	polymerase (DNA-directed), delta 3, accessory subunit	5.32e-19
Dppa2	developmental pluripotency associated 2	5.35e-19
Atp4b	ATPase, H+/K+ exchanging, beta polypeptide	5.38e-19
Naprt1	nicotinate phosphoribosyltransferase domain containing 1	5.43e-19
Sox15	SRY-box containing gene 15	5.45e-19
Klf16	Kruppel-like factor 16	5.53e-19
Slco3a1	solute carrier organic anion transporter family, member 3a1	5.64e-19
Epas1	endothelial PAS domain protein 1	5.65e-19
Klhl9	kelch-like 9 (Drosophila)	5.65e-19
Kcnrg	potassium channel regulator	5.71e-19
Aloxe3	arachidonate lipoxygenase 3	5.78e-19
Slc5a7	solute carrier family 5 (choline transporter), member 7	5.82e-19
Nxph4	neurexophilin 4	5.85e-19
Efcab3	EF-hand calcium binding domain 3	5.86e-19
Il1rapl2	interleukin 1 receptor accessory protein-like 2	5.92e-19
Kifap3	kinesin-associated protein 3	6.06e-19
Hal	histidine ammonia lyase	6.2e-19
Ppp1r9b	protein phosphatase 1, regulatory subunit 9B	6.21e-19
Ubtf	upstream binding transcription factor, RNA polymerase I	6.22e-19
Bmp1	bone morphogenetic protein 1	6.22e-19
Myf5	myogenic factor 5	6.31e-19
Rerg	RAS-like, estrogen-regulated, growth-inhibitor	6.36e-19
Ripk2	receptor (TNFRSF)-interacting serine-threonine kinase 2	6.49e-19
Gje1	gap junction membrane channel protein epsilon 1	6.93e-19
Usp37	ubiquitin specific peptidase 37	7.06e-19
Gtf2i	general transcription factor II I	7.22e-19
Tspyl3	TSPY-like 3	7.33e-19
Gramd1c	GRAM domain containing 1C	7.34e-19
Cldn12	claudin 12	7.38e-19
Rab11fip4	RAB11 family interacting protein 4 (class II)	7.49e-19
Atp2b3	ATPase, Ca++ transporting, plasma membrane 3	7.57e-19
Iqsec2	IQ motif and Sec7 domain 2	7.58e-19
Baiap2l2	BAI1-associated protein 2-like 2	7.73e-19
Wiz	widely-interspaced zinc finger motifs	7.79e-19
Spock3	sparc/osteonectin, cwcv and kazal-like domains proteoglycan 3	7.9e-19
Syt1	synaptotagmin I	8.01e-19
Il24	interleukin 24	8.04e-19
Frs2	fibroblast growth factor receptor substrate 2	8.19e-19
Fgf16	fibroblast growth factor 16	8.21e-19
Slc17a4	solute carrier family 17 (sodium phosphate), member 4	8.25e-19
Dok5	docking protein 5	8.35e-19
Klf11	Kruppel-like factor 11	8.37e-19
Myo6	myosin VI	8.37e-19
Tmem163	transmembrane protein 163	8.37e-19
Recql5	RecQ protein-like 5	8.68e-19
Aldh5a1	aldhehyde dehydrogenase family 5, subfamily A1	8.89e-19
Pkp3	plakophilin 3	8.9e-19
Rab33a	RAB33A, member of RAS oncogene family	8.93e-19
Taar2	trace amine-associated receptor 2	8.94e-19
Col6a1	collagen, type VI, alpha 1	8.97e-19
Arl2bp	ADP-ribosylation factor-like 2 binding protein	9.03e-19
Hdac9	histone deacetylase 9	9.09e-19
Lgi2	leucine-rich repeat LGI family, member 2	9.36e-19
Lbh	limb-bud and heart	9.59e-19
Vps24	vacuolar protein sorting 24 (yeast)	9.68e-19
Adprhl1	ADP-ribosylhydrolase like 1	9.95e-19
Slc7a5	solute carrier family 7 (cationic amino acid transporter, y+ system), member 5	1e-18
Irx3	Iroquois related homeobox 3 (Drosophila)	1.02e-18
Neurod4	neurogenic differentiation 4	1.02e-18
Pde10a	phosphodiesterase 10A	1.03e-18
Dazap2	DAZ associated protein 2	1.04e-18
Asb4	ankyrin repeat and SOCS box-containing 4	1.06e-18
Eya2	eyes absent 2 homolog (Drosophila)	1.07e-18
Cfhr1	complement factor H-related 1	1.09e-18
Cst11	cystatin 11	1.09e-18
Tmem127	transmembrane protein 127	1.1e-18
Usp43	ubiquitin specific peptidase 43	1.1e-18
Dok1	docking protein 1	1.11e-18
Myom1	myomesin 1	1.12e-18
Tal1	T-cell acute lymphocytic leukemia 1	1.16e-18
Tceal3	---	1.16e-18
Folr2	folate receptor 2 (fetal)	1.17e-18
Pou4f1	POU domain, class 4, transcription factor 1	1.17e-18
Gp1ba	glycoprotein 1b, alpha polypeptide	1.18e-18
Mtmr4	myotubularin related protein 4	1.21e-18
Slc12a7	solute carrier family 12, member 7	1.21e-18
Dnajc14	DnaJ (Hsp40) homolog, subfamily C, member 14	1.22e-18
Rreb1	ras responsive element binding protein 1	1.26e-18
Gmip	Gem-interacting protein	1.27e-18
Gpr110	G protein-coupled receptor 110	1.27e-18
Chml	choroideremia-like	1.28e-18
Pepd	peptidase D	1.29e-18
Has1	hyaluronan synthase1	1.29e-18
Fate1	fetal and adult testis expressed 1	1.29e-18
Efhd1	EF hand domain containing 1	1.31e-18
Sost	sclerostin	1.31e-18
Glra3	glycine receptor, alpha 3 subunit	1.32e-18
Nfix	nuclear factor I/X	1.32e-18
Elmod2	ELMO domain containing 2	1.34e-18
Fgf20	fibroblast growth factor 20	1.34e-18
Mtl5	metallothionein-like 5, testis-specific (tesmin)	1.34e-18
Kras	v-Ki-ras2 Kirsten rat sarcoma viral oncogene homolog	1.38e-18
Hist4h4	histone cluster 4, H4	1.39e-18
Rgs13	regulator of G-protein signaling 13	1.41e-18
Ppp1r10	protein phosphatase 1, regulatory subunit 10	1.41e-18
Lrrc14	leucine rich repeat containing 14	1.41e-18
Pmvk	phosphomevalonate kinase	1.46e-18
Tph1	tryptophan hydroxylase 1	1.47e-18
Nphp4	nephronophthisis 4 (juvenile) homolog (human)	1.47e-18
Sbk1	SH3-binding kinase 1	1.49e-18
Mink1	misshapen-like kinase 1 (zebrafish)	1.51e-18
Ly96	lymphocyte antigen 96	1.52e-18
Hgf	hepatocyte growth factor	1.54e-18
Cyb5r2	cytochrome b5 reductase 2	1.55e-18
Rab3d	RAB3D, member RAS oncogene family	1.6e-18
Rab8b	RAB8B, member RAS oncogene family	1.61e-18
Tnrc6c	trinucleotide repeat containing 6C	1.62e-18
Sult4a1	sulfotransferase family 4A, member 1	1.63e-18
Gfap	glial fibrillary acidic protein	1.64e-18
Spo11	sporulation protein, meiosis-specific, SPO11 homolog (S. cerevisiae)	1.64e-18
Csf1r	colony stimulating factor 1 receptor	1.65e-18
Ccdc69	coiled-coil domain containing 69	1.68e-18
Tead1	TEA domain family member 1	1.72e-18
Sel1l	sel-1 suppressor of lin-12-like (C. elegans)	1.74e-18
Selm	selenoprotein M	1.75e-18
Gabrb3	gamma-aminobutyric acid (GABA) A receptor, subunit beta 3	1.76e-18
Pdcd1	programmed cell death 1	1.78e-18
Rnf130	ring finger protein 130	1.79e-18
Disp2	dispatched homolog 2 (Drosophila)	1.8e-18
Fam63a	family with sequence similarity 63, member A	1.83e-18
Ptprf	protein tyrosine phosphatase, receptor type, F	1.85e-18
Elavl2	ELAV (embryonic lethal, abnormal vision, Drosophila)-like 2 (Hu antigen B)	1.88e-18
Rgs6	regulator of G-protein signaling 6	1.89e-18
Galc	galactosylceramidase	1.9e-18
Gzmb	granzyme B	1.9e-18
Enpep	glutamyl aminopeptidase	1.91e-18
Ncor2	nuclear receptor co-repressor 2	1.94e-18
Rnf2	ring finger protein 2	1.95e-18
Tbx20	T-box 20	1.96e-18
Cyb561	cytochrome b-561	1.98e-18
Wac	WW domain containing adaptor with coiled-coil	1.99e-18
Cyb5r3	cytochrome b5 reductase 3	2.01e-18
Aqp8	aquaporin 8	2.01e-18
Adamts7	a disintegrin-like and metallopeptidase (reprolysin type) with thrombospondin type 1 motif, 7	2.06e-18
Scamp4	secretory carrier membrane protein 4	2.09e-18
Dlx3	distal-less homeobox 3	2.13e-18
Usp6nl	USP6 N-terminal like	2.23e-18
Rfc3	replication factor C (activator 1) 3	2.24e-18
Bap1	Brca1 associated protein 1	2.25e-18
Enah	enabled homolog (Drosophila)	2.25e-18
Cyhr1	cysteine and histidine rich 1	2.27e-18
Ccdc108	coiled-coil domain containing 108	2.28e-18
Pftk1	PFTAIRE protein kinase 1	2.28e-18
Gsg1	germ cell-specific gene 1	2.3e-18
Chrnb1	cholinergic receptor, nicotinic, beta polypeptide 1 (muscle)	2.3e-18
Gbp4	guanylate binding protein 4	2.32e-18
Vangl1	vang-like 1 (van gogh, Drosophila)	2.35e-18
Lrrk1	leucine-rich repeat kinase 1	2.37e-18
Slamf1	signaling lymphocytic activation molecule family member 1	2.38e-18
Prkci	protein kinase C, iota	2.38e-18
Mak	male germ cell-associated kinase	2.38e-18
Spop	speckle-type POZ protein	2.39e-18
Prmt8	protein arginine N-methyltransferase 8	2.41e-18
Gp9	glycoprotein 9 (platelet)	2.43e-18
Clec5a	C-type lectin domain family 5, member a	2.44e-18
Duoxa2	dual oxidase maturation factor 2	2.55e-18
Fbxw8	F-box and WD-40 domain protein 8	2.55e-18
Suv39h2	suppressor of variegation 3-9 homolog 2 (Drosophila)	2.55e-18
Zbtb39	zinc finger and BTB domain containing 39	2.55e-18
Scg3	secretogranin III	2.57e-18
Pomt2	protein-O-mannosyltransferase 2	2.59e-18
Rragc	Ras-related GTP binding C	2.61e-18
Acp1	acid phosphatase 1, soluble	2.68e-18
Tes	testis derived transcript	2.68e-18
Hpcal4	hippocalcin-like 4	2.69e-18
Tub	tubby candidate gene	2.72e-18
Nudt16l1	nudix (nucleoside diphosphate linked moiety X)-type motif 16-like 1	2.76e-18
Pcdhgb1	---	2.78e-18
Tm7sf4	transmembrane 7 superfamily member 4	2.81e-18
Rab43	RAB43, member RAS oncogene family	2.82e-18
Fshr	follicle stimulating hormone receptor	2.83e-18
Zdhhc2	zinc finger, DHHC domain containing 2	2.86e-18
Unc5b	unc-5 homolog B (C. elegans)	2.89e-18
Nexn	nexilin	2.9e-18
Cyp11b2	cytochrome P450, family 11, subfamily b, polypeptide 2	2.93e-18
Max	Max protein	2.93e-18
Prkcdbp	protein kinase C, delta binding protein	2.94e-18
Fam73a	family with sequence similarity 73, member A	2.94e-18
Arhgap9	Rho GTPase activating protein 9	2.97e-18
Il7r	interleukin 7 receptor	2.99e-18
Rp1	retinitis pigmentosa 1 (human)	3e-18
Lpin3	lipin 3	3.01e-18
Ankrd11	ankyrin repeat domain 11	3.01e-18
Col9a1	collagen, type IX, alpha 1	3.05e-18
Capn10	calpain 10	3.09e-18
Lzts1	leucine zipper, putative tumor suppressor 1	3.11e-18
Nox1	NADPH oxidase 1	3.12e-18
Dlgap4	discs, large homolog-associated protein 4 (Drosophila)	3.14e-18
Slc4a1	solute carrier family 4 (anion exchanger), member 1	3.16e-18
Atp11b	ATPase, class VI, type 11B	3.22e-18
Myo1b	myosin IB	3.23e-18
Dirc2	disrupted in renal carcinoma 2 (human)	3.25e-18
Anks4b	ankyrin repeat and sterile alpha motif domain containing 4B	3.41e-18
Pglyrp4	peptidoglycan recognition protein 4	3.48e-18
Gadd45b	growth arrest and DNA-damage-inducible 45 beta	3.5e-18
Fbxl13	F-box and leucine-rich repeat protein 13	3.52e-18
Asphd2	aspartate beta-hydroxylase domain containing 2	3.56e-18
Tmc3	transmembrane channel-like gene family 3	3.66e-18
Ctss	cathepsin S	3.7e-18
Mafg	v-maf musculoaponeurotic fibrosarcoma oncogene family, protein G (avian)	3.71e-18
Samd8	sterile alpha motif domain containing 8	3.86e-18
Actl7a	actin-like 7a	3.92e-18
Ubqln2	ubiquilin 2	3.92e-18
Lrrn3	leucine rich repeat protein 3, neuronal	3.93e-18
Cd180	CD180 antigen	3.99e-18
Chodl	chondrolectin	4.01e-18
Pla2r1	phospholipase A2 receptor 1	4.05e-18
Pxn	paxillin	4.06e-18
Cdh20	cadherin 20	4.11e-18
Col17a1	collagen, type XVII, alpha 1	4.11e-18
Dusp3	dual specificity phosphatase 3 (vaccinia virus phosphatase VH1-related)	4.18e-18
Dsg3	desmoglein 3	4.26e-18
Il12rb1	interleukin 12 receptor, beta 1	4.26e-18
Scn3b	sodium channel, voltage-gated, type III, beta	4.27e-18
Ccr2	chemokine (C-C motif) receptor 2	4.3e-18
Pygb	brain glycogen phosphorylase	4.34e-18
Herpud1	homocysteine-inducible, endoplasmic reticulum stress-inducible, ubiquitin-like domain member 1	4.37e-18
Oaz1	ornithine decarboxylase antizyme 1	4.45e-18
Ormdl3	ORM1-like 3 (S. cerevisiae)	4.46e-18
Cln8	ceroid-lipofuscinosis, neuronal 8	4.47e-18
Slc9a8	solute carrier family 9 (sodium/hydrogen exchanger), member 8	4.48e-18
Neo1	neogenin	4.49e-18
Pcdhb18	protocadherin beta 18	4.5e-18
Cntnap1	contactin associated protein-like 1	4.55e-18
Fam5b	family with sequence similarity 5, member B	4.56e-18
Mx2	myxovirus (influenza virus) resistance 2	4.56e-18
Rnpc3	RNA-binding region (RNP1, RRM) containing 3	4.57e-18
Rbp2	retinol binding protein 2, cellular	4.59e-18
Ppp3cc	protein phosphatase 3, catalytic subunit, gamma isoform	4.64e-18
Nup98	nucleoporin 98	4.65e-18
Gabrr1	gamma-aminobutyric acid (GABA) C receptor, subunit rho 1	4.7e-18
Plxnc1	plexin C1	4.7e-18
Kpna4	karyopherin (importin) alpha 4	4.74e-18
Gosr2	golgi SNAP receptor complex member 2	4.76e-18
Traf5	TNF receptor-associated factor 5	4.78e-18
Smad2	MAD homolog 2 (Drosophila)	4.94e-18
Ap3s2	adaptor-related protein complex 3, sigma 2 subunit	4.98e-18
Cx3cr1	chemokine (C-X3-C) receptor 1	4.98e-18
Dmd	dystrophin, muscular dystrophy	4.99e-18
Fastkd1	FAST kinase domains 1	5.01e-18
Poln	DNA polymerase N	5.15e-18
Paqr5	progestin and adipoQ receptor family member V	5.15e-18
Cd163	CD163 antigen	5.15e-18
Cyp1b1	cytochrome P450, family 1, subfamily b, polypeptide 1	5.16e-18
Zcchc13	zinc finger, CCHC domain containing 13	5.18e-18
Mafk	v-maf musculoaponeurotic fibrosarcoma oncogene family, protein K (avian)	5.3e-18
Il18bp	---	5.35e-18
Hist1h2ac	histone cluster 1, H2ac	5.43e-18
Epha4	Eph receptor A4	5.44e-18
Kcnk3	potassium channel, subfamily K, member 3	5.47e-18
Ppp2r1b	protein phosphatase 2 (formerly 2A), regulatory subunit A (PR 65), beta isoform	5.51e-18
Nek3	NIMA (never in mitosis gene a)-related expressed kinase 3	5.53e-18
Tspan14	tetraspanin 14	5.55e-18
Limd2	LIM domain containing 2	5.67e-18
Rsu1	Ras suppressor protein 1	5.7e-18
Usp2	ubiquitin specific peptidase 2	5.73e-18
Gabarapl2	gamma-aminobutyric acid (GABA) A receptor-associated protein-like 2	5.8e-18
Phf8	PHD finger protein 8	5.89e-18
S100a8	S100 calcium binding protein A8 (calgranulin A)	5.96e-18
Rnasel	ribonuclease L (2', 5'-oligoisoadenylate synthetase-dependent)	6e-18
Wapal	wings apart-like homolog (Drosophila)	6.08e-18
Rara	retinoic acid receptor, alpha	6.26e-18
Mlf1	myeloid leukemia factor 1	6.31e-18
Lif	leukemia inhibitory factor	6.49e-18
Actr1a	ARP1 actin-related protein 1 homolog A, centractin alpha (yeast)	6.52e-18
Slc20a2	solute carrier family 20, member 2	6.57e-18
Mpp5	membrane protein, palmitoylated 5 (MAGUK p55 subfamily member 5)	6.6e-18
Anapc5	anaphase-promoting complex subunit 5	6.75e-18
Ctdspl2	CTD (carboxy-terminal domain, RNA polymerase II, polypeptide A) small phosphatase like 2	6.89e-18
Abcc6	ATP-binding cassette, sub-family C (CFTR/MRP), member 6	6.97e-18
Cryba1	crystallin, beta A1	7.14e-18
Slc5a12	solute carrier family 5 (sodium/glucose cotransporter), member 12	7.19e-18
Hmcn2	hemicentin 2	7.33e-18
Fgr	Gardner-Rasheed feline sarcoma viral (Fgr) oncogene homolog	7.37e-18
Adipoq	adiponectin, C1Q and collagen domain containing	7.56e-18
Gys2	glycogen synthase 2	7.61e-18
Atp6v1g2	ATPase, H+ transporting, lysosomal V1 subunit G2	7.64e-18
Lmcd1	LIM and cysteine-rich domains 1	7.69e-18
Pdzd4	PDZ domain containing 4	7.78e-18
Krt77	keratin 77	7.84e-18
Zc3h7a	zinc finger CCCH type containing 7 A	7.85e-18
Nfkbil2	nuclear factor of kappa light polypeptide gene enhancer in B-cells inhibitor-like 2	7.86e-18
Oxt	oxytocin	7.9e-18
Plekho1	pleckstrin homology domain containing, family O member 1	8.04e-18
Taf7l	TAF7-like RNA polymerase II, TATA box binding protein (TBP)-associated factor	8.1e-18
Mat1a	methionine adenosyltransferase I, alpha	8.15e-18
Teddm1	transmembrane epididymal protein 1	8.28e-18
Psd3	pleckstrin and Sec7 domain containing 3	8.37e-18
Pde4a	phosphodiesterase 4A, cAMP specific	8.39e-18
Lrrc4	leucine rich repeat containing 4	8.48e-18
Camk2a	calcium/calmodulin-dependent protein kinase II alpha	8.54e-18
Fmnl3	formin-like 3	8.65e-18
Cttnbp2nl	CTTNBP2 N-terminal like	8.67e-18
Zbtb7b	zinc finger and BTB domain containing 7B	8.74e-18
Fgf5	fibroblast growth factor 5	8.75e-18
Fgf14	fibroblast growth factor 14	8.79e-18
Dgcr2	DiGeorge syndrome critical region gene 2	8.85e-18
Tmem97	transmembrane protein 97	8.86e-18
Cacng2	calcium channel, voltage-dependent, gamma subunit 2	8.89e-18
Wipi2	WD repeat domain, phosphoinositide interacting 2	8.92e-18
Ccnk	cyclin K	8.94e-18
Armet	arginine-rich, mutated in early stage tumors	9.27e-18
Creg2	cellular repressor of E1A-stimulated genes 2	9.29e-18
Ttc12	tetratricopeptide repeat domain 12	9.35e-18
Khsrp	KH-type splicing regulatory protein	9.43e-18
Cpa3	carboxypeptidase A3, mast cell	9.44e-18
Igf1	insulin-like growth factor 1	9.71e-18
Lig3	ligase III, DNA, ATP-dependent	9.77e-18
Gbp3	guanylate binding protein 3	9.87e-18
Aco2	aconitase 2, mitochondrial	9.88e-18
Lrrc27	leucine rich repeat containing 27	9.96e-18
Vgll2	vestigial like 2 homolog (Drosophila)	1.01e-17
Mfap5	microfibrillar associated protein 5	1.02e-17
Zmat2	zinc finger, matrin type 2	1.04e-17
Olfm3	olfactomedin 3	1.06e-17
Nrp1	neuropilin 1	1.06e-17
Ror2	receptor tyrosine kinase-like orphan receptor 2	1.07e-17
Pcdhb1	protocadherin beta 1	1.08e-17
Slc35c1	solute carrier family 35, member C1	1.08e-17
Chrna1	cholinergic receptor, nicotinic, alpha polypeptide 1 (muscle)	1.1e-17
Slc26a2	solute carrier family 26 (sulfate transporter), member 2	1.12e-17
Hormad1	HORMA domain containing 1	1.12e-17
Wdr40b	WD repeat domain 40B	1.13e-17
Colec10	collectin sub-family member 10	1.14e-17
Unc5c	unc-5 homolog C (C. elegans)	1.15e-17
Aldh1a2	aldehyde dehydrogenase family 1, subfamily A2	1.15e-17
Ndst1	N-deacetylase/N-sulfotransferase (heparan glucosaminyl) 1	1.16e-17
Flot2	flotillin 2	1.17e-17
Tmem86a	transmembrane protein 86A	1.17e-17
Vsig4	V-set and immunoglobulin domain containing 4	1.18e-17
Kcnk10	potassium channel, subfamily K, member 10	1.2e-17
Pou2f2	POU domain, class 2, transcription factor 2	1.21e-17
Gatm	glycine amidinotransferase (L-arginine:glycine amidinotransferase)	1.21e-17
Galnt10	UDP-N-acetyl-alpha-D-galactosamine:polypeptide N-acetylgalactosaminyltransferase 10	1.21e-17
Gjb3	gap junction protein, beta 3	1.22e-17
Fblim1	filamin binding LIM protein 1	1.23e-17
Hectd2	HECT domain containing 2	1.23e-17
Nagpa	N-acetylglucosamine-1-phosphodiester alpha-N-acetylglucosaminidase	1.23e-17
Map2k3	mitogen-activated protein kinase kinase 3	1.24e-17
Lyzl6	lysozyme-like 6	1.24e-17
Eif4enif1	eukaryotic translation initiation factor 4E nuclear import factor 1	1.24e-17
Cacna1a	calcium channel, voltage-dependent, P/Q type, alpha 1A subunit	1.25e-17
Mrpl20	mitochondrial ribosomal protein L20	1.25e-17
Ica1l	islet cell autoantigen 1-like	1.26e-17
Darc	Duffy blood group, chemokine receptor	1.26e-17
Cetn1	centrin 1	1.27e-17
Jrk	jerky	1.28e-17
Midn	midnolin	1.3e-17
Gucy1b3	guanylate cyclase 1, soluble, beta 3	1.3e-17
Ctage5	CTAGE family, member 5	1.3e-17
Adra1b	adrenergic receptor, alpha 1b	1.3e-17
Il1r1	interleukin 1 receptor, type I	1.32e-17
Pip5kl1	phosphatidylinositol-4-phosphate 5-kinase-like 1	1.33e-17
Setd7	SET domain containing (lysine methyltransferase) 7	1.35e-17
Nppa	natriuretic peptide precursor type A	1.35e-17
Slc7a1	solute carrier family 7 (cationic amino acid transporter, y+ system), member 1	1.36e-17
Cnnm3	cyclin M3	1.36e-17
Slc25a24	solute carrier family 25 (mitochondrial carrier, phosphate carrier), member 24	1.37e-17
Ubr2	ubiquitin protein ligase E3 component n-recognin 2	1.44e-17
Rabgap1	RAB GTPase activating protein 1	1.47e-17
Snrk	SNF related kinase	1.48e-17
Gpr175	G protein-coupled receptor 175	1.51e-17
Amph	amphiphysin	1.52e-17
Myt1l	myelin transcription factor 1-like	1.53e-17
Igfbpl1	insulin-like growth factor binding protein-like 1	1.54e-17
Abcb11	ATP-binding cassette, sub-family B (MDR/TAP), member 11	1.54e-17
Zc3h10	zinc finger CCCH type containing 10	1.57e-17
Dcun1d1	DCN1, defective in cullin neddylation 1, domain containing 1 (S. cerevisiae)	1.61e-17
Supt7l	suppressor of Ty 7 (S. cerevisiae)-like	1.62e-17
Paox	polyamine oxidase (exo-N4-amino)	1.63e-17
Pkp1	plakophilin 1	1.65e-17
Ehmt1	euchromatic histone methyltransferase 1	1.65e-17
Qpctl	glutaminyl-peptide cyclotransferase-like	1.68e-17
Sh3gl3	SH3-domain GRB2-like 3	1.68e-17
Tbc1d24	TBC1 domain family, member 24	1.68e-17
Spata18	spermatogenesis associated 18	1.69e-17
Epha3	Eph receptor A3	1.7e-17
Cml2	camello-like 2	1.71e-17
Mrpl43	mitochondrial ribosomal protein L43	1.71e-17
Ramp1	receptor (calcitonin) activity modifying protein 1	1.73e-17
Slc24a2	solute carrier family 24 (sodium/potassium/calcium exchanger), member 2	1.73e-17
Rtp3	receptor transporter protein 3	1.74e-17
Osbpl2	oxysterol binding protein-like 2	1.76e-17
Sox1	SRY-box containing gene 1	1.76e-17
Pgls	6-phosphogluconolactonase	1.78e-17
Evl	Ena-vasodilator stimulated phosphoprotein	1.8e-17
Ppan	peter pan homolog (Drosophila)	1.81e-17
Pnma2	paraneoplastic antigen MA2	1.81e-17
Pcgf3	polycomb group ring finger 3	1.81e-17
Sds	serine dehydratase	1.82e-17
Npsr1	neuropeptide S receptor 1	1.84e-17
Mvk	mevalonate kinase	1.84e-17
Adam29	a disintegrin and metallopeptidase domain 29	1.86e-17
Alox15	arachidonate 15-lipoxygenase	1.86e-17
Svop	SV2 related protein	1.87e-17
Slc38a4	solute carrier family 38, member 4	1.91e-17
Arl10	ADP-ribosylation factor-like 10	1.92e-17
Rit2	Ras-like without CAAX 2	1.93e-17
Irf5	interferon regulatory factor 5	1.93e-17
Adra2b	adrenergic receptor, alpha 2b	1.93e-17
Myd88	myeloid differentiation primary response gene 88	1.94e-17
Slc6a15	solute carrier family 6 (neurotransmitter transporter), member 15	2e-17
Slc16a12	solute carrier family 16 (monocarboxylic acid transporters), member 12	2.05e-17
Il1f9	interleukin 1 family, member 9	2.06e-17
Gpr82	G protein-coupled receptor 82	2.07e-17
Gpr21	G protein-coupled receptor 21	2.08e-17
Rpusd2	RNA pseudouridylate synthase domain containing 2	2.11e-17
Dnali1	dynein, axonemal, light intermediate polypeptide 1	2.11e-17
Rbm12b	RNA binding motif protein 12B	2.18e-17
Nrip2	nuclear receptor interacting protein 2	2.18e-17
Lrp6	low density lipoprotein receptor-related protein 6	2.19e-17
Igf1r	insulin-like growth factor I receptor	2.2e-17
Dqx1	DEAQ RNA-dependent ATPase	2.22e-17
Elmo2	engulfment and cell motility 2, ced-12 homolog (C. elegans)	2.26e-17
Sftpa1	surfactant associated protein A1	2.26e-17
Gfra2	glial cell line derived neurotrophic factor family receptor alpha 2	2.28e-17
Csf2rb	colony stimulating factor 2 receptor, beta, low-affinity (granulocyte-macrophage)	2.31e-17
Dpys	dihydropyrimidinase	2.33e-17
Odf2	outer dense fiber of sperm tails 2	2.36e-17
Armcx5	armadillo repeat containing, X-linked 5	2.38e-17
Slc11a2	solute carrier family 11 (proton-coupled divalent metal ion transporters), member 2	2.38e-17
Ngfr	nerve growth factor receptor (TNFR superfamily, member 16)	2.41e-17
Lipi	lipase, member I	2.43e-17
Fam20b	family with sequence similarity 20, member B	2.45e-17
Itsn2	intersectin 2	2.48e-17
Col4a6	collagen, type IV, alpha 6	2.5e-17
Mcf2l	mcf.2 transforming sequence-like	2.51e-17
Neu2	neuraminidase 2	2.53e-17
Trim26	tripartite motif-containing 26	2.6e-17
Acss1	acyl-CoA synthetase short-chain family member 1	2.7e-17
Arl6ip5	ADP-ribosylation factor-like 6 interacting protein 5	2.71e-17
Mtmr6	myotubularin related protein 6	2.73e-17
Fam62c	family with sequence similarity 62, member C	2.73e-17
Parvg	parvin, gamma	2.78e-17
Cftr	cystic fibrosis transmembrane conductance regulator homolog	2.79e-17
Abhd4	abhydrolase domain containing 4	2.79e-17
Tceal8	transcription elongation factor A (SII)-like 8	2.82e-17
Gas2l1	growth arrest-specific 2 like 1	2.84e-17
Mtbp	Mdm2, transformed 3T3 cell double minute p53 binding protein	2.88e-17
Rraga	Ras-related GTP binding A	2.92e-17
Park7	Parkinson disease (autosomal recessive, early onset) 7	2.93e-17
Lce1d	late cornified envelope 1D	2.93e-17
Mmp16	matrix metallopeptidase 16	2.94e-17
Rims1	regulating synaptic membrane exocytosis 1	2.96e-17
Inhbe	inhibin beta E	2.97e-17
Ltbp2	latent transforming growth factor beta binding protein 2	2.99e-17
Hvcn1	hydrogen voltage-gated channel 1	3.01e-17
Spata16	spermatogenesis associated 16	3.02e-17
Lrrc25	leucine rich repeat containing 25	3.07e-17
Sftpb	surfactant associated protein B	3.07e-17
Ddi2	DNA-damage inducible protein 2	3.13e-17
Tead3	TEA domain family member 3	3.13e-17
Hs3st3b1	heparan sulfate (glucosamine) 3-O-sulfotransferase 3B1	3.14e-17
Ccdc115	coiled-coil domain containing 115	3.14e-17
Ryr3	ryanodine receptor 3	3.17e-17
Cd300a	CD300A antigen	3.18e-17
Col1a1	collagen, type I, alpha 1	3.2e-17
Ccl5	chemokine (C-C motif) ligand 5	3.21e-17
C1qtnf3	C1q and tumor necrosis factor related protein 3	3.21e-17
Lrat	lecithin-retinol acyltransferase (phosphatidylcholine-retinol-O-acyltransferase)	3.25e-17
Slc1a1	solute carrier family 1 (neuronal/epithelial high affinity glutamate transporter, system Xag), member 1	3.35e-17
Slc25a14	solute carrier family 25 (mitochondrial carrier, brain), member 14	3.36e-17
Cnih3	cornichon homolog 3 (Drosophila)	3.38e-17
Brunol4	bruno-like 4, RNA binding protein (Drosophila)	3.39e-17
Pxmp4	peroxisomal membrane protein 4	3.47e-17
Calm1	calmodulin 1	3.48e-17
Cmtm8	CKLF-like MARVEL transmembrane domain containing 8	3.49e-17
Hspb6	heat shock protein, alpha-crystallin-related, B6	3.49e-17
Entpd3	ectonucleoside triphosphate diphosphohydrolase 3	3.51e-17
Rab39b	RAB39B, member RAS oncogene family	3.52e-17
Slc11a1	solute carrier family 11 (proton-coupled divalent metal ion transporters), member 1	3.52e-17
Rgmb	RGM domain family, member B	3.56e-17
Rassf5	Ras association (RalGDS/AF-6) domain family member 5	3.56e-17
Ptprt	protein tyrosine phosphatase, receptor type, T	3.58e-17
Eif4ebp2	eukaryotic translation initiation factor 4E binding protein 2	3.59e-17
Kif5a	kinesin family member 5A	3.63e-17
Cybasc3	cytochrome b, ascorbate dependent 3	3.67e-17
Polh	polymerase (DNA directed), eta (RAD 30 related)	3.69e-17
Wnt3a	wingless-related MMTV integration site 3A	3.75e-17
Slc24a4	solute carrier family 24 (sodium/potassium/calcium exchanger), member 4	3.78e-17
Magi3	membrane associated guanylate kinase, WW and PDZ domain containing 3	3.79e-17
Adam22	a disintegrin and metallopeptidase domain 22	3.8e-17
Epm2a	epilepsy, progressive myoclonic epilepsy, type 2 gene alpha	3.84e-17
Rbm4b	RNA binding motif protein 4B	3.85e-17
P2ry12	purinergic receptor P2Y, G-protein coupled 12	3.86e-17
Top3b	topoisomerase (DNA) III beta	3.89e-17
Hoxd9	homeo box D9	3.95e-17
Yipf2	Yip1 domain family, member 2	3.98e-17
Dnase2b	deoxyribonuclease II beta	3.98e-17
Slco2a1	solute carrier organic anion transporter family, member 2a1	4e-17
Rhbdf2	rhomboid 5 homolog 2 (Drosophila)	4e-17
Map2k4	mitogen-activated protein kinase kinase 4	4e-17
Rybp	RING1 and YY1 binding protein	4.01e-17
F13a1	coagulation factor XIII, A1 subunit	4.1e-17
Rnf17	ring finger protein 17	4.11e-17
Krtcap2	keratinocyte associated protein 2	4.12e-17
Trim7	tripartite motif-containing 7	4.19e-17
Mfi2	antigen p97 (melanoma associated) identified by monoclonal antibodies 133.2 and 96.5	4.21e-17
Slc1a3	solute carrier family 1 (glial high affinity glutamate transporter), member 3	4.22e-17
Nlgn3	neuroligin 3	4.22e-17
G6pc2	glucose-6-phosphatase, catalytic, 2	4.26e-17
Kctd7	potassium channel tetramerisation domain containing 7	4.27e-17
Kcnip1	Kv channel-interacting protein 1	4.28e-17
Dpy19l1	dpy-19-like 1 (C. elegans)	4.31e-17
Dusp18	dual specificity phosphatase 18	4.34e-17
Plxna2	plexin A2	4.36e-17
Tirap	toll-interleukin 1 receptor (TIR) domain-containing adaptor protein	4.37e-17
Ltb4r2	leukotriene B4 receptor 2	4.41e-17
Tusc1	tumor suppressor candidate 1	4.48e-17
Pthlh	parathyroid hormone-like peptide	4.51e-17
Opn4	opsin 4 (melanopsin)	4.61e-17
Glp1r	glucagon-like peptide 1 receptor	4.66e-17
Tacr1	tachykinin receptor 1	4.67e-17
Foxd1	forkhead box D1	4.69e-17
Ube2b	ubiquitin-conjugating enzyme E2B, RAD6 homology (S. cerevisiae)	4.7e-17
Cdk5r1	cyclin-dependent kinase 5, regulatory subunit 1 (p35)	4.74e-17
Exoc5	exocyst complex component 5	4.74e-17
Hipk1	homeodomain interacting protein kinase 1	4.84e-17
Mrps18b	mitochondrial ribosomal protein S18B	4.86e-17
Ptrh1	peptidyl-tRNA hydrolase 1 homolog (S. cerevisiae)	4.91e-17
Sgca	sarcoglycan, alpha (dystrophin-associated glycoprotein)	4.91e-17
Tusc2	tumor suppressor candidate 2	4.94e-17
Ptgfrn	prostaglandin F2 receptor negative regulator	4.95e-17
Ing5	inhibitor of growth family, member 5	4.99e-17
Xcl1	chemokine (C motif) ligand 1	5e-17
Stard4	StAR-related lipid transfer (START) domain containing 4	5.02e-17
Tmem40	transmembrane protein 40	5.08e-17
Ppm1k	protein phosphatase 1K (PP2C domain containing)	5.23e-17
Alg3	asparagine-linked glycosylation 3 homolog (yeast, alpha-1,3-mannosyltransferase)	5.25e-17
Pcnxl3	pecanex-like 3 (Drosophila)	5.3e-17
Bag5	BCL2-associated athanogene 5	5.36e-17
Rfx1	regulatory factor X, 1 (influences HLA class II expression)	5.36e-17
Wnt7a	wingless-related MMTV integration site 7A	5.42e-17
Foxl1	forkhead box L1	5.69e-17
Ubp1	upstream binding protein 1	5.75e-17
Sf3a1	splicing factor 3a, subunit 1	5.82e-17
Tmem87a	transmembrane protein 87A	5.83e-17
Lhfpl4	lipoma HMGIC fusion partner-like protein 4	5.84e-17
Ccdc40	coiled-coil domain containing 40	5.93e-17
Cldn18	claudin 18	5.96e-17
Scn5a	sodium channel, voltage-gated, type V, alpha	5.98e-17
Kcnh7	potassium voltage-gated channel, subfamily H (eag-related), member 7	5.99e-17
Lect2	leukocyte cell-derived chemotaxin 2	6.02e-17
Socs4	suppressor of cytokine signaling 4	6.05e-17
Gzmk	granzyme K	6.09e-17
Cd5	CD5 antigen	6.19e-17
Oxr1	oxidation resistance 1	6.25e-17
Sesn3	sestrin 3	6.26e-17
Fut10	fucosyltransferase 10	6.43e-17
Hexim1	hexamethylene bis-acetamide inducible 1	6.51e-17
Ghrhr	growth hormone releasing hormone receptor	6.51e-17
Aqp4	aquaporin 4	6.67e-17
Gpr157	G protein-coupled receptor 157	6.71e-17
Atxn7l1	ataxin 7-like 1	6.72e-17
Rabgap1l	RAB GTPase activating protein 1-like	6.94e-17
Irf7	interferon regulatory factor 7	6.99e-17
Col25a1	collagen, type XXV, alpha 1	7.13e-17
Plekha5	pleckstrin homology domain containing, family A member 5	7.14e-17
Stk4	serine/threonine kinase 4	7.16e-17
Sohlh2	spermatogenesis and oogenesis specific basic helix-loop-helix 2	7.21e-17
Eif2ak2	eukaryotic translation initiation factor 2-alpha kinase 2	7.37e-17
Rabl5	RAB, member of RAS oncogene family-like 5	7.39e-17
Kir3dl1	killer cell immunoglobulin-like receptor, three domains, long cytoplasmic tail, 1	7.41e-17
Fam123a	family with sequence similarity 123, member A	7.43e-17
Cryga	crystallin, gamma A	7.5e-17
Pld3	phospholipase D family, member 3	7.54e-17
Spag17	sperm associated antigen 17	7.7e-17
Irx6	Iroquois related homeobox 6 (Drosophila)	7.84e-17
Hunk	hormonally upregulated Neu-associated kinase	7.85e-17
Sin3b	transcriptional regulator, SIN3B (yeast)	8.03e-17
Ptprd	protein tyrosine phosphatase, receptor type, D	8.29e-17
Ptplb	protein tyrosine phosphatase-like (proline instead of catalytic arginine), member b	8.32e-17
Il18rap	interleukin 18 receptor accessory protein	8.32e-17
Pou6f2	POU domain, class 6, transcription factor 2	8.35e-17
Grhl3	grainyhead-like 3 (Drosophila)	8.38e-17
C1qtnf1	C1q and tumor necrosis factor related protein 1	8.44e-17
Atp6v1a	ATPase, H+ transporting, lysosomal V1 subunit A	8.45e-17
Gpr37	G protein-coupled receptor 37	8.46e-17
Sirpa	signal-regulatory protein alpha	8.49e-17
St6gal2	beta galactoside alpha 2,6 sialyltransferase 2	8.54e-17
Sord	sorbitol dehydrogenase	8.57e-17
Pdgfra	platelet derived growth factor receptor, alpha polypeptide	8.65e-17
Muc13	mucin 13, epithelial transmembrane	8.66e-17
Gria4	glutamate receptor, ionotropic, AMPA4 (alpha 4)	8.7e-17
Tapbp	TAP binding protein	8.72e-17
Nkd2	naked cuticle 2 homolog (Drosophila)	8.75e-17
Hnf4a	hepatic nuclear factor 4, alpha	8.93e-17
Rogdi	rogdi homolog (Drosophila)	8.96e-17
Basp1	brain abundant, membrane attached signal protein 1	8.99e-17
Eya3	eyes absent 3 homolog (Drosophila)	9e-17
Ttc3	tetratricopeptide repeat domain 3	9.06e-17
Heyl	hairy/enhancer-of-split related with YRPW motif-like	9.07e-17
Epha8	Eph receptor A8	9.13e-17
Tll2	tolloid-like 2	9.14e-17
Plat	plasminogen activator, tissue	9.17e-17
Tm2d1	TM2 domain containing 1	9.2e-17
Ndfip1	Nedd4 family interacting protein 1	9.29e-17
Rab1b	RAB1B, member RAS oncogene family	9.39e-17
Sertad3	SERTA domain containing 3	9.49e-17
Eml4	echinoderm microtubule associated protein like 4	9.66e-17
Stmn2	stathmin-like 2	9.71e-17
Map3k7ip2	mitogen-activated protein kinase kinase kinase 7 interacting protein 2	9.76e-17
Acbd5	acyl-Coenzyme A binding domain containing 5	9.8e-17
Adal	adenosine deaminase-like	9.88e-17
Pou4f2	POU domain, class 4, transcription factor 2	9.96e-17
Insm2	insulinoma-associated 2	1e-16
Slc44a5	solute carrier family 44, member 5	1.01e-16
Churc1	churchill domain containing 1	1.01e-16
Cacna1d	calcium channel, voltage-dependent, L type, alpha 1D subunit	1.02e-16
Rab3ip	RAB3A interacting protein	1.03e-16
Ly6g6e	lymphocyte antigen 6 complex, locus G6E	1.04e-16
Lrp1b	low density lipoprotein-related protein 1B (deleted in tumors)	1.04e-16
Setdb1	SET domain, bifurcated 1	1.06e-16
Trim65	tripartite motif-containing 65	1.06e-16
Styx	serine/threonine/tyrosine interaction protein	1.07e-16
Cramp1l	Crm, cramped-like (Drosophila)	1.07e-16
Clec4e	C-type lectin domain family 4, member e	1.07e-16
Hspa1a	heat shock protein 1A	1.08e-16
Mep1b	meprin 1 beta	1.09e-16
Ncam1	neural cell adhesion molecule 1	1.09e-16
Slc34a2	solute carrier family 34 (sodium phosphate), member 2	1.09e-16
Elp3	elongation protein 3 homolog (S. cerevisiae)	1.15e-16
Theg	testicular haploid expressed gene	1.15e-16
Smurf1	SMAD specific E3 ubiquitin protein ligase 1	1.16e-16
Col5a3	collagen, type V, alpha 3	1.17e-16
Plekha3	pleckstrin homology domain-containing, family A (phosphoinositide binding specific) member 3	1.18e-16
Park2	Parkinson disease (autosomal recessive, juvenile) 2, parkin	1.19e-16
Il3ra	interleukin 3 receptor, alpha chain	1.19e-16
Gpr6	G protein-coupled receptor 6	1.19e-16
Cd84	CD84 antigen	1.19e-16
Scn1a	sodium channel, voltage-gated, type I, alpha	1.23e-16
Rims2	regulating synaptic membrane exocytosis 2	1.23e-16
Mutyh	mutY homolog (E. coli)	1.24e-16
Ifnb1	interferon beta 1, fibroblast	1.25e-16
Hapln4	hyaluronan and proteoglycan link protein 4	1.27e-16
Pax5	paired box gene 5	1.27e-16
Arrb2	arrestin, beta 2	1.28e-16
Wnt9a	wingless-type MMTV integration site 9A	1.29e-16
Cnot2	CCR4-NOT transcription complex, subunit 2	1.29e-16
Cacnb2	calcium channel, voltage-dependent, beta 2 subunit	1.29e-16
Acot12	acyl-CoA thioesterase 12	1.29e-16
Optc	opticin	1.31e-16
Dpp10	dipeptidylpeptidase 10	1.32e-16
Ak1	adenylate kinase 1	1.32e-16
Ppp1r3c	protein phosphatase 1, regulatory (inhibitor) subunit 3C	1.33e-16
Tnfaip1	tumor necrosis factor, alpha-induced protein 1 (endothelial)	1.37e-16
Grem1	gremlin 1	1.37e-16
Dok4	docking protein 4	1.37e-16
Il28ra	interleukin 28 receptor alpha	1.38e-16
Sh3pxd2b	SH3 and PX domains 2B	1.38e-16
Ghrl	ghrelin	1.4e-16
Ppp1r3f	protein phosphatase 1, regulatory (inhibitor) subunit 3F	1.41e-16
Eras	ES cell-expressed Ras	1.43e-16
Il5ra	interleukin 5 receptor, alpha	1.44e-16
S100pbp	S100P binding protein	1.45e-16
Rb1	retinoblastoma 1	1.46e-16
Rin3	Ras and Rab interactor 3	1.49e-16
Parp14	poly (ADP-ribose) polymerase family, member 14	1.51e-16
Klra1	killer cell lectin-like receptor, subfamily A, member 1	1.54e-16
Ssh2	slingshot homolog 2 (Drosophila)	1.55e-16
Ehd2	EH-domain containing 2	1.55e-16
Rln1	relaxin 1	1.57e-16
Kmo	kynurenine 3-monooxygenase (kynurenine 3-hydroxylase)	1.58e-16
Cxxc5	CXXC finger 5	1.59e-16
Slc39a14	solute carrier family 39 (zinc transporter), member 14	1.59e-16
Bzrap1	benzodiazapine receptor associated protein 1	1.62e-16
Wdr17	WD repeat domain 17	1.63e-16
Catsper4	cation channel, sperm associated 4	1.64e-16
Tln2	talin 2	1.65e-16
Arntl	aryl hydrocarbon receptor nuclear translocator-like	1.66e-16
Masp2	mannan-binding lectin serine peptidase 2	1.67e-16
Eppk1	---	1.67e-16
Fkbp7	FK506 binding protein 7	1.69e-16
Fam5c	family with sequence similarity 5, member C	1.71e-16
Trpc3	transient receptor potential cation channel, subfamily C, member 3	1.72e-16
Pde6b	phosphodiesterase 6B, cGMP, rod receptor, beta polypeptide	1.72e-16
Grm3	glutamate receptor, metabotropic 3	1.72e-16
Prtn3	proteinase 3	1.73e-16
Pcdhb14	protocadherin beta 14	1.73e-16
Rgnef	Rho-guanine nucleotide exchange factor	1.74e-16
Rgma	RGM domain family, member A	1.75e-16
Nmbr	neuromedin B receptor	1.75e-16
Rgs14	regulator of G-protein signaling 14	1.76e-16
A2bp1	ataxin 2 binding protein 1	1.79e-16
Sh3bp2	SH3-domain binding protein 2	1.79e-16
Dsc3	desmocollin 3	1.8e-16
Gpr171	G protein-coupled receptor 171	1.8e-16
Rxrb	retinoid X receptor beta	1.8e-16
Plekhb1	pleckstrin homology domain containing, family B (evectins) member 1	1.82e-16
Six1	sine oculis-related homeobox 1 homolog (Drosophila)	1.82e-16
Ehd4	EH-domain containing 4	1.83e-16
Piwil2	piwi-like homolog 2 (Drosophila)	1.84e-16
Nek4	NIMA (never in mitosis gene a)-related expressed kinase 4	1.84e-16
Neurod1	neurogenic differentiation 1	1.87e-16
Nicn1	nicolin 1	1.88e-16
Rnf141	ring finger protein 141	1.88e-16
Ttbk1	tau tubulin kinase 1	1.91e-16
Mkx	mohawk homeobox	1.93e-16
Ece2	endothelin converting enzyme 2	1.94e-16
Ewsr1	Ewing sarcoma breakpoint region 1	1.95e-16
Phf21a	PHD finger protein 21A	2e-16
Clcn6	chloride channel 6	2.02e-16
Tmem146	transmembrane protein 146	2.03e-16
Snai2	snail homolog 2 (Drosophila)	2.04e-16
Cd177	CD177 antigen	2.09e-16
St18	suppression of tumorigenicity 18	2.12e-16
Traf6	TNF receptor-associated factor 6	2.14e-16
Taar1	trace amine-associated receptor 1	2.18e-16
Gpnmb	glycoprotein (transmembrane) nmb	2.19e-16
Ctnna3	catenin (cadherin associated protein), alpha 3	2.21e-16
Enpp6	ectonucleotide pyrophosphatase/phosphodiesterase 6	2.22e-16
Pctk3	PCTAIRE-motif protein kinase 3	2.23e-16
Klk7	kallikrein related-peptidase 7 (chymotryptic, stratum corneum)	2.23e-16
Dnajc16	DnaJ (Hsp40) homolog, subfamily C, member 16	2.34e-16
Col20a1	collagen, type XX, alpha 1	2.35e-16
Gpr84	G protein-coupled receptor 84	2.37e-16
Hpse	heparanase	2.38e-16
Brip1	BRCA1 interacting protein C-terminal helicase 1	2.39e-16
Ky	kyphoscoliosis peptidase	2.4e-16
Pask	PAS domain containing serine/threonine kinase	2.41e-16
Vps28	vacuolar protein sorting 28 (yeast)	2.42e-16
Atpbd4	ATP binding domain 4	2.43e-16
Nufip1	nuclear fragile X mental retardation protein interacting protein 1	2.45e-16
S100a3	S100 calcium binding protein A3	2.45e-16
Cstf3	cleavage stimulation factor, 3' pre-RNA, subunit 3	2.46e-16
Klhdc4	kelch domain containing 4	2.47e-16
Dsg4	desmoglein 4	2.48e-16
Gvin1	GTPase, very large interferon inducible 1	2.49e-16
Clec11a	C-type lectin domain family 11, member a	2.49e-16
Vax2	ventral anterior homeobox containing gene 2	2.5e-16
Slc22a18	solute carrier family 22 (organic cation transporter), member 18	2.51e-16
Rspo1	R-spondin homolog (Xenopus laevis)	2.52e-16
[truncated: 4,778 more rows]
