# Supplementary material for: Transcriptional evidence for the "Reverse Warburg Effect" in human breast cancer tumor stroma and metastasis: Similarities with oxidative stress, inflammation, Alzheimer's disease, and "Neuron-Glia Metabolic Coupling"
Source: Aging (Albany NY). 2010 Mar 31;2(4):185–99. doi: 10.18632/aging.100134 (PMC2881509; doi:10.18632/aging.100134)
Supplement: Supplementary Table 2 [file aging-02-185-s002.xls]

## Sheet: Suppl Table 2.Recurrence.xls
Gene	Description	p-value
Lad1	ladinin	2.89e-12
Akap8	A kinase (PRKA) anchor protein 8	1.5e-09
Kif23	kinesin family member 23	4.27e-09
Nanos1	nanos homolog 1 (Drosophila)	1.17e-08
Rab3d	RAB3D, member RAS oncogene family	1.33e-08
Atp6v1a	ATPase, H+ transporting, lysosomal V1 subunit A	1.51e-08
Cpamd8	C3 and PZP-like, alpha-2-macroglobulin domain containing 8	7.11e-08
Pkmyt1	protein kinase, membrane associated tyrosine/threonine 1	9.13e-08
Kmo	kynurenine 3-monooxygenase (kynurenine 3-hydroxylase)	1.07e-07
Ptpn11	protein tyrosine phosphatase, non-receptor type 11	1.24e-07
Tmem132a	transmembrane protein 132A	2.94e-07
Steap3	STEAP family member 3	3.1e-07
Cep290	centrosomal protein 290	5.08e-07
Tpm1	tropomyosin 1, alpha	5.23e-07
Ppp1r1b	protein phosphatase 1, regulatory (inhibitor) subunit 1B	5.3e-07
Hrasls	HRAS-like suppressor	6.16e-07
Vwa1	von Willebrand factor A domain containing 1	9.87e-07
Arl8a	ADP-ribosylation factor-like 8A	1.18e-06
Traf1	TNF receptor-associated factor 1	1.27e-06
Tlr9	toll-like receptor 9	1.47e-06
Klf5	Kruppel-like factor 5	1.72e-06
Loxl3	lysyl oxidase-like 3	1.89e-06
Dst	dystonin	1.92e-06
Rnf170	ring finger protein 170	2.06e-06
Bspry	B-box and SPRY domain containing	2.3e-06
Azi1	5-azacytidine induced gene 1	2.61e-06
Fabp6	fatty acid binding protein 6, ileal (gastrotropin)	2.69e-06
Foxred2	FAD-dependent oxidoreductase domain containing 2	2.82e-06
Hsf1	heat shock factor 1	3.12e-06
Erbb2	v-erb-b2 erythroblastic leukemia viral oncogene homolog 2, neuro/glioblastoma derived oncogene homolog (avian)	3.14e-06
Sall4	sal-like 4 (Drosophila)	3.26e-06
Pycrl	pyrroline-5-carboxylate reductase-like	3.43e-06
Spp1	secreted phosphoprotein 1	3.48e-06
Dlx4	distal-less homeobox 4	4.1e-06
Il4i1	interleukin 4 induced 1	4.22e-06
Apbb1	amyloid beta (A4) precursor protein-binding, family B, member 1	4.67e-06
Tpp2	tripeptidyl peptidase II	4.81e-06
Cldn3	claudin 3	5.27e-06
Lynx1	Ly6/neurotoxin 1	5.36e-06
Ovol1	OVO homolog-like 1 (Drosophila)	5.55e-06
Opa3	optic atrophy 3 (human)	5.55e-06
Tbc1d24	TBC1 domain family, member 24	6.12e-06
Sost	sclerostin	6.72e-06
Limk2	LIM motif-containing protein kinase 2	6.81e-06
Dusp2	dual specificity phosphatase 2	6.88e-06
Ak5	adenylate kinase 5	7.04e-06
Chrm1	cholinergic receptor, muscarinic 1, CNS	8.1e-06
Arv1	ARV1 homolog (yeast)	9.1e-06
Dhx32	DEAH (Asp-Glu-Ala-His) box polypeptide 32	9.74e-06
Slc23a2	solute carrier family 23 (nucleobase transporters), member 2	1.01e-05
Tspan32	tetraspanin 32	1.11e-05
Hoxb13	homeo box B13	1.13e-05
Chd7	chromodomain helicase DNA binding protein 7	1.21e-05
Pld4	phospholipase D family, member 4	1.21e-05
Hk2	hexokinase 2	1.23e-05
Eif4ebp1	eukaryotic translation initiation factor 4E binding protein 1	1.41e-05
Ncoa5	nuclear receptor coactivator 5	1.45e-05
Dpysl2	dihydropyrimidinase-like 2	1.5e-05
Kdelr2	KDEL (Lys-Asp-Glu-Leu) endoplasmic reticulum protein retention receptor 2	1.56e-05
Susd2	sushi domain containing 2	1.56e-05
Dusp3	dual specificity phosphatase 3 (vaccinia virus phosphatase VH1-related)	1.61e-05
Zc3h12a	zinc finger CCCH type containing 12A	1.66e-05
Tpm4	tropomyosin 4	1.68e-05
Prss22	protease, serine, 22	1.7e-05
Sh3bp2	SH3-domain binding protein 2	1.73e-05
Cldn9	claudin 9	1.93e-05
Cxcl16	chemokine (C-X-C motif) ligand 16	2.01e-05
Pfkfb3	6-phosphofructo-2-kinase/fructose-2,6-biphosphatase 3	2.02e-05
Rims2	regulating synaptic membrane exocytosis 2	2.02e-05
Eppk1	---	2.03e-05
Tst	thiosulfate sulfurtransferase, mitochondrial	2.06e-05
Fam65a	family with sequence similarity 65, member A	2.13e-05
Pla2g3	phospholipase A2, group III	2.13e-05
Siglec5	sialic acid binding Ig-like lectin 5	2.19e-05
Bpil2	bactericidal/permeability-increasing protein-like 2	2.24e-05
Fgf2	fibroblast growth factor 2	2.26e-05
Sox21	SRY-box containing gene 21	2.43e-05
Eda	ectodysplasin-A	2.5e-05
Snf8	SNF8, ESCRT-II complex subunit, homolog (S. cerevisiae)	2.55e-05
Yipf2	Yip1 domain family, member 2	2.55e-05
Wdr51a	WD repeat domain 51A	2.67e-05
Ak3l1	adenylate kinase 3-like 1	2.85e-05
Vps18	vacuolar protein sorting 18 (yeast)	2.86e-05
Mark2	MAP/microtubule affinity-regulating kinase 2	2.88e-05
Cdh12	cadherin 12	2.89e-05
Cabp4	calcium binding protein 4	2.91e-05
Pcgf1	polycomb group ring finger 1	2.94e-05
Cacnb1	calcium channel, voltage-dependent, beta 1 subunit	3.07e-05
Acy3	aspartoacylase (aminoacylase) 3	3.15e-05
Crlf3	cytokine receptor-like factor 3	3.17e-05
Slc39a4	solute carrier family 39 (zinc transporter), member 4	3.2e-05
Ctnna2	catenin (cadherin associated protein), alpha 2	3.33e-05
Ncald	neurocalcin delta	3.41e-05
Kcnv2	potassium channel, subfamily V, member 2	3.41e-05
Letm1	leucine zipper-EF-hand containing transmembrane protein 1	3.56e-05
Csdc2	cold shock domain containing C2, RNA binding	3.63e-05
Arfip2	ADP-ribosylation factor interacting protein 2	3.68e-05
Gp1ba	glycoprotein 1b, alpha polypeptide	3.69e-05
Gcn1l1	GCN1 general control of amino-acid synthesis 1-like 1 (yeast)	3.73e-05
Ppp1r13l	protein phosphatase 1, regulatory (inhibitor) subunit 13 like	3.88e-05
Exosc4	exosome component 4	3.99e-05
Col13a1	collagen, type XIII, alpha 1	4.16e-05
Manea	mannosidase, endo-alpha	4.17e-05
Ccnb2	cyclin B2	4.31e-05
Faim2	Fas apoptotic inhibitory molecule 2	4.31e-05
Col20a1	collagen, type XX, alpha 1	4.34e-05
Gipc2	GIPC PDZ domain containing family, member 2	4.37e-05
Impa2	inositol (myo)-1(or 4)-monophosphatase 2	4.37e-05
Grin2a	glutamate receptor, ionotropic, NMDA2A (epsilon 1)	4.48e-05
Nnat	---	4.58e-05
Slc35b4	solute carrier family 35, member B4	4.76e-05
Six4	sine oculis-related homeobox 4 homolog (Drosophila)	4.77e-05
Hn1	hematological and neurological expressed sequence 1	4.87e-05
Hoxd3	homeo box D3	4.89e-05
Syt2	synaptotagmin II	4.92e-05
Fgf1	fibroblast growth factor 1	5.01e-05
Adck4	aarF domain containing kinase 4	5.03e-05
Tep1	telomerase associated protein 1	5.05e-05
U2af1l4	U2 small nuclear RNA auxiliary factor 1-like 4	5.06e-05
Mixl1	Mix1 homeobox-like 1 (Xenopus laevis)	5.14e-05
Atad2	ATPase family, AAA domain containing 2	5.48e-05
Pvrl1	poliovirus receptor-related 1	5.51e-05
Trim16	tripartite motif-containing 16	5.55e-05
Gnb1	guanine nucleotide binding protein (G protein), beta 1	5.57e-05
Stac2	SH3 and cysteine rich domain 2	5.65e-05
H6pd	hexose-6-phosphate dehydrogenase (glucose 1-dehydrogenase)	5.71e-05
Slc7a6	solute carrier family 7 (cationic amino acid transporter, y+ system), member 6	5.72e-05
Atp13a2	ATPase type 13A2	5.91e-05
Rbbp6	retinoblastoma binding protein 6	6.01e-05
Vrk1	vaccinia related kinase 1	6.05e-05
Abp1	amiloride binding protein 1 (amine oxidase, copper-containing)	6.08e-05
Bap1	Brca1 associated protein 1	6.16e-05
Rab3ip	RAB3A interacting protein	6.29e-05
Cmtm4	CKLF-like MARVEL transmembrane domain containing 4	6.33e-05
Krt5	keratin 5	6.5e-05
Tbx6	T-box 6	6.62e-05
Plekha6	pleckstrin homology domain containing, family A member 6	6.71e-05
Tal1	T-cell acute lymphocytic leukemia 1	6.77e-05
Foxd1	forkhead box D1	6.79e-05
Opn4	opsin 4 (melanopsin)	7.05e-05
Pacs1	phosphofurin acidic cluster sorting protein 1	7.21e-05
Il17a	interleukin 17A	7.21e-05
Cnih3	cornichon homolog 3 (Drosophila)	7.21e-05
Efna2	ephrin A2	7.28e-05
Ntf3	neurotrophin 3	7.46e-05
Oplah	5-oxoprolinase (ATP-hydrolysing)	7.47e-05
Ets1	E26 avian leukemia oncogene 1, 5' domain	7.54e-05
Mfn1	mitofusin 1	7.77e-05
Dkk4	dickkopf homolog 4 (Xenopus laevis)	7.78e-05
Chrnb2	cholinergic receptor, nicotinic, beta polypeptide 2 (neuronal)	7.87e-05
Rnf41	ring finger protein 41	7.9e-05
Il15ra	interleukin 15 receptor, alpha chain	7.95e-05
Col3a1	collagen, type III, alpha 1	8e-05
Itgb3	integrin beta 3	8.09e-05
Krt4	keratin 4	8.17e-05
Smc4	structural maintenance of chromosomes 4	8.28e-05
Cyhr1	cysteine and histidine rich 1	8.29e-05
Hus1b	Hus1 homolog b (S. pombe)	8.3e-05
Rhpn1	rhophilin, Rho GTPase binding protein 1	8.37e-05
Kcnj10	potassium inwardly-rectifying channel, subfamily J, member 10	8.6e-05
Mapk13	mitogen-activated protein kinase 13	8.66e-05
Ing5	inhibitor of growth family, member 5	8.81e-05
Brunol4	bruno-like 4, RNA binding protein (Drosophila)	8.88e-05
Camk1g	calcium/calmodulin-dependent protein kinase I gamma	8.91e-05
Fcamr	Fc receptor, IgA, IgM, high affinity	8.96e-05
Prkar1b	protein kinase, cAMP dependent regulatory, type I beta	8.96e-05
Pla2g10	phospholipase A2, group X	9.15e-05
Cacna1b	calcium channel, voltage-dependent, N type, alpha 1B subunit	9.36e-05
Cnn1	calponin 1	9.41e-05
Zbtb3	zinc finger and BTB domain containing 3	9.47e-05
Hoxd13	homeo box D13	9.48e-05
Upk3b	uroplakin 3B	9.69e-05
Acsm2	acyl-CoA synthetase medium-chain family member 2	9.7e-05
Rspo3	R-spondin 3 homolog (Xenopus laevis)	9.71e-05
Gnl3l	guanine nucleotide binding protein-like 3 (nucleolar)-like	9.74e-05
Tll1	tolloid-like	9.74e-05
Panx3	pannexin 3	9.77e-05
Slc6a17	solute carrier family 6 (neurotransmitter transporter), member 17	9.83e-05
Ccdc42	coiled-coil domain containing 42	9.88e-05
Arhgef4	Rho guanine nucleotide exchange factor (GEF) 4	9.94e-05
Pnkp	polynucleotide kinase 3'- phosphatase	0.0001
Serpinb8	serine (or cysteine) peptidase inhibitor, clade B, member 8	0.000101
Rin3	Ras and Rab interactor 3	0.000104
Sh3bp1	SH3-domain binding protein 1	0.000105
Sfrs16	splicing factor, arginine/serine-rich 16	0.000106
Pld3	phospholipase D family, member 3	0.000107
Rac3	RAS-related C3 botulinum substrate 3	0.000107
Tbc1d17	TBC1 domain family, member 17	0.000107
Cldn11	claudin 11	0.000108
Pdzd4	PDZ domain containing 4	0.00011
Nek7	NIMA (never in mitosis gene a)-related expressed kinase 7	0.00011
Fancc	Fanconi anemia, complementation group C	0.000111
Zfp36l1	zinc finger protein 36, C3H type-like 1	0.000113
Cacnb2	calcium channel, voltage-dependent, beta 2 subunit	0.000114
Ccdc91	coiled-coil domain containing 91	0.000115
Siae	sialic acid acetylesterase	0.000116
Kifc2	kinesin family member C2	0.000117
Slc25a16	solute carrier family 25 (mitochondrial carrier, Graves disease autoantigen), member 16	0.000117
Ghrhr	growth hormone releasing hormone receptor	0.000119
Eps15	epidermal growth factor receptor pathway substrate 15	0.00012
Paqr5	progestin and adipoQ receptor family member V	0.000122
Socs4	suppressor of cytokine signaling 4	0.000123
Neurod4	neurogenic differentiation 4	0.000123
Mink1	misshapen-like kinase 1 (zebrafish)	0.000123
Enpp6	ectonucleotide pyrophosphatase/phosphodiesterase 6	0.000123
Dctn1	dynactin 1	0.000123
Baiap2	brain-specific angiogenesis inhibitor 1-associated protein 2	0.000124
St8sia2	ST8 alpha-N-acetyl-neuraminide alpha-2,8-sialyltransferase 2	0.000125
Mobkl2c	MOB1, Mps One Binder kinase activator-like 2C (yeast)	0.000126
Tspan5	tetraspanin 5	0.000126
Slc36a1	solute carrier family 36 (proton/amino acid symporter), member 1	0.000127
Arpm1	actin related protein M1	0.00013
Pla2g5	phospholipase A2, group V	0.000131
Gjb1	gap junction protein, beta 1	0.000131
Chchd5	coiled-coil-helix-coiled-coil-helix domain containing 5	0.000131
Tecta	tectorin alpha	0.000132
Myc	myelocytomatosis oncogene	0.000132
Slc41a1	solute carrier family 41, member 1	0.000133
Fam62c	family with sequence similarity 62, member C	0.000133
Pcnxl2	pecanex-like 2 (Drosophila)	0.000134
Hipk1	homeodomain interacting protein kinase 1	0.000135
Cant1	calcium activated nucleotidase 1	0.000136
Glyat	glycine-N-acyltransferase	0.000136
Dcakd	dephospho-CoA kinase domain containing	0.000138
Plcxd1	phosphatidylinositol-specific phospholipase C, X domain containing 1	0.000138
Sh3gl2	SH3-domain GRB2-like 2	0.000138
Trib3	tribbles homolog 3 (Drosophila)	0.000138
Extl1	exostoses (multiple)-like 1	0.000139
Stk40	serine/threonine kinase 40	0.000139
Vps37d	vacuolar protein sorting 37D (yeast)	0.00014
Pllp	plasma membrane proteolipid	0.000141
Pcgf2	polycomb group ring finger 2	0.000142
Grhl3	grainyhead-like 3 (Drosophila)	0.000142
Jrk	jerky	0.000143
Adamts2	a disintegrin-like and metallopeptidase (reprolysin type) with thrombospondin type 1 motif, 2	0.000144
Cdx4	caudal type homeo box 4	0.000147
Mmp12	matrix metallopeptidase 12	0.000147
Mos	Moloney sarcoma oncogene	0.000147
Fam5c	family with sequence similarity 5, member C	0.000148
Tnfsf9	tumor necrosis factor (ligand) superfamily, member 9	0.000148
Farp2	FERM, RhoGEF and pleckstrin domain protein 2	0.00015
Prkaa2	protein kinase, AMP-activated, alpha 2 catalytic subunit	0.00015
Slc2a10	solute carrier family 2 (facilitated glucose transporter), member 10	0.000151
Tjp3	tight junction protein 3	0.000152
Rasgrf1	RAS protein-specific guanine nucleotide-releasing factor 1	0.000152
Pofut2	protein O-fucosyltransferase 2	0.000152
Itpkc	inositol 1,4,5-trisphosphate 3-kinase C	0.000152
Nmur2	neuromedin U receptor 2	0.000154
Lax1	lymphocyte transmembrane adaptor 1	0.000154
Fancb	Fanconi anemia, complementation group B	0.000155
Mknk2	MAP kinase-interacting serine/threonine kinase 2	0.000155
Tmem63a	transmembrane protein 63a	0.000155
Gpsm3	G-protein signalling modulator 3 (AGS3-like, C. elegans)	0.000156
Pde4b	phosphodiesterase 4B, cAMP specific	0.000156
Tns1	tensin 1	0.000159
Mmp9	matrix metallopeptidase 9	0.00016
Mrpl9	mitochondrial ribosomal protein L9	0.000162
Eda2r	ectodysplasin A2 isoform receptor	0.000162
Myo9b	myosin IXb	0.000164
Atg16l1	autophagy-related 16-like 1 (yeast)	0.000164
Lbp	lipopolysaccharide binding protein	0.000165
Pcdh21	protocadherin 21	0.000166
Lta	lymphotoxin A	0.000167
Per1	period homolog 1 (Drosophila)	0.000168
Rgnef	Rho-guanine nucleotide exchange factor	0.000168
Sez6l2	seizure related 6 homolog like 2	0.00017
Ptcra	pre T-cell antigen receptor alpha	0.00017
Nav2	neuron navigator 2	0.00017
Foxc2	forkhead box C2	0.00017
Galnt10	UDP-N-acetyl-alpha-D-galactosamine:polypeptide N-acetylgalactosaminyltransferase 10	0.000171
Ibsp	integrin binding sialoprotein	0.000176
Ypel1	yippee-like 1 (Drosophila)	0.000177
Itgb1bp2	integrin beta 1 binding protein 2	0.000178
Aff4	AF4/FMR2 family, member 4	0.000179
Mme	membrane metallo endopeptidase	0.00018
F11r	F11 receptor	0.00018
Aqp9	aquaporin 9	0.00018
Thrap3	thyroid hormone receptor associated protein 3	0.000181
Nos1	nitric oxide synthase 1, neuronal	0.000182
Grin1	glutamate receptor, ionotropic, NMDA1 (zeta 1)	0.000182
Gm2a	GM2 ganglioside activator protein	0.000183
Cdc42ep1	CDC42 effector protein (Rho GTPase binding) 1	0.000184
Dpp7	dipeptidylpeptidase 7	0.000186
Ss18l1	synovial sarcoma translocation gene on chromosome 18-like 1	0.000187
Ebi3	Epstein-Barr virus induced gene 3	0.000188
Tgm3	transglutaminase 3, E polypeptide	0.00019
Snapc4	small nuclear RNA activating complex, polypeptide 4	0.00019
Golph3l	golgi phosphoprotein 3-like	0.00019
Elk1	ELK1, member of ETS oncogene family	0.00019
Foxd3	forkhead box D3	0.000191
Arhgap8	Rho GTPase activating protein 8	0.000192
Pias3	protein inhibitor of activated STAT 3	0.000193
Atp10a	ATPase, class V, type 10A	0.000193
Cecr5	cat eye syndrome chromosome region, candidate 5 homolog (human)	0.000194
Htr2b	5-hydroxytryptamine (serotonin) receptor 2B	0.000194
Sag	retinal S-antigen	0.000194
Syt3	synaptotagmin III	0.000195
Zc3h7a	zinc finger CCCH type containing 7 A	0.000196
Pole3	polymerase (DNA directed), epsilon 3 (p17 subunit)	0.000198
Usp19	ubiquitin specific peptidase 19	0.000199
Krt34	keratin 34	0.000201
Glp2r	glucagon-like peptide 2 receptor	0.000202
Adamts13	a disintegrin-like and metallopeptidase (reprolysin type) with thrombospondin type 1 motif, 13	0.000202
Kdr	kinase insert domain protein receptor	0.000204
Fcrl5	Fc receptor-like 5	0.000205
Gsk3a	glycogen synthase kinase 3 alpha	0.000205
Ptpn5	protein tyrosine phosphatase, non-receptor type 5	0.000205
Spg7	spastic paraplegia 7 homolog (human)	0.000205
Erg	avian erythroblastosis virus E-26 (v-ets) oncogene related	0.000207
Tnfaip8l2	tumor necrosis factor, alpha-induced protein 8-like 2	0.000207
Cep192	centrosomal protein 192	0.00021
Cdk5r1	cyclin-dependent kinase 5, regulatory subunit 1 (p35)	0.000214
Mfsd2	major facilitator superfamily domain containing 2	0.000214
Pxmp4	peroxisomal membrane protein 4	0.000214
Ssh1	slingshot homolog 1 (Drosophila)	0.000214
Hif3a	hypoxia inducible factor 3, alpha subunit	0.000215
Tns4	tensin 4	0.000215
Dock3	dedicator of cyto-kinesis 3	0.000216
Pop1	processing of precursor 1, ribonuclease P/MRP family, (S. cerevisiae)	0.000216
E4f1	E4F transcription factor 1	0.000219
Cdh7	cadherin 7, type 2	0.000219
Crb3	crumbs homolog 3 (Drosophila)	0.000222
Narg1	NMDA receptor-regulated gene 1	0.000223
Slc22a17	solute carrier family 22 (organic cation transporter), member 17	0.000224
Kcnk13	potassium channel, subfamily K, member 13	0.000225
Ppp1r16b	protein phosphatase 1, regulatory (inhibitor) subunit 16B	0.000228
Slc39a12	solute carrier family 39 (zinc transporter), member 12	0.000229
Cx3cl1	chemokine (C-X3-C motif) ligand 1	0.00023
Cep164	centrosomal protein 164	0.000231
Dlg2	discs, large homolog 2 (Drosophila)	0.000232
Gab2	growth factor receptor bound protein 2-associated protein 2	0.000234
Otx1	orthodenticle homolog 1 (Drosophila)	0.000234
Grik1	glutamate receptor, ionotropic, kainate 1	0.000235
Ntsr1	neurotensin receptor 1	0.000237
Myh9	myosin, heavy polypeptide 9, non-muscle	0.000239
Drap1	Dr1 associated protein 1 (negative cofactor 2 alpha)	0.000239
Cd6	CD6 antigen	0.000239
Vcl	vinculin	0.000241
Tmprss13	transmembrane protease, serine 13	0.000241
Atpbd4	ATP binding domain 4	0.000241
Samd7	sterile alpha motif domain containing 7	0.000243
Tmem30b	transmembrane protein 30B	0.000244
Zranb3	zinc finger, RAN-binding domain containing 3	0.000244
Spaca4	sperm acrosome associated 4	0.000245
Exph5	exophilin 5	0.000249
G6pc3	glucose 6 phosphatase, catalytic, 3	0.000249
B3gnt4	UDP-GlcNAc:betaGal beta-1,3-N-acetylglucosaminyltransferase 4	0.00025
Dpp10	dipeptidylpeptidase 10	0.000251
Tnks	tankyrase, TRF1-interacting ankyrin-related ADP-ribose polymerase	0.000251
Bat2	HLA-B associated transcript 2	0.000252
Otos	otospiralin	0.000252
Gprc5d	G protein-coupled receptor, family C, group 5, member D	0.000253
Pax7	paired box gene 7	0.000254
Irx1	Iroquois related homeobox 1 (Drosophila)	0.000256
Nudt14	nudix (nucleoside diphosphate linked moiety X)-type motif 14	0.000257
Nudt13	nudix (nucleoside diphosphate linked moiety X)-type motif 13	0.00026
Tnfsf15	tumor necrosis factor (ligand) superfamily, member 15	0.00026
Abhd1	---	0.000261
Sox7	SRY-box containing gene 7	0.000262
Endog	endonuclease G	0.000263
Glis2	GLIS family zinc finger 2	0.000268
Wdhd1	WD repeat and HMG-box DNA binding protein 1	0.000271
Alx3	aristaless-like homeobox 3	0.000274
Mlxip	MLX interacting protein	0.000274
Srms	src-related kinase lacking C-terminal regulatory tyrosine and N-terminal myristylation sites	0.000277
Kcnip4	Kv channel interacting protein 4	0.000279
Atf7ip	activating transcription factor 7 interacting protein	0.00028
B3galnt1	UDP-GalNAc:betaGlcNAc beta 1,3-galactosaminyltransferase, polypeptide 1	0.00028
Pcdhgb1	---	0.000281
Mmab	methylmalonic aciduria (cobalamin deficiency) type B homolog (human)	0.000282
Fbxo27	F-box protein 27	0.000284
Col11a1	collagen, type XI, alpha 1	0.000284
Hyou1	hypoxia up-regulated 1	0.000285
Nploc4	nuclear protein localization 4 homolog (S. cerevisiae)	0.000285
Arrdc1	arrestin domain containing 1	0.000286
Cd226	CD226 antigen	0.000287
Loxl4	lysyl oxidase-like 4	0.000287
Vsig2	V-set and immunoglobulin domain containing 2	0.000288
Zic5	zinc finger protein of the cerebellum 5	0.000291
Nol3	nucleolar protein 3 (apoptosis repressor with CARD domain)	0.000291
H1fnt	H1 histone family, member N, testis-specific	0.000291
Ccdc14	coiled-coil domain containing 14	0.000291
Hook3	hook homolog 3 (Drosophila)	0.000292
Irx5	Iroquois related homeobox 5 (Drosophila)	0.000292
Slc16a4	solute carrier family 16 (monocarboxylic acid transporters), member 4	0.000293
Actl6b	actin-like 6B	0.000293
Gpr56	G protein-coupled receptor 56	0.000295
Esm1	endothelial cell-specific molecule 1	0.000295
Rxrb	retinoid X receptor beta	0.000296
Clec2d	C-type lectin domain family 2, member d	0.000302
Srrm2	serine/arginine repetitive matrix 2	0.000305
Mybpc3	myosin binding protein C, cardiac	0.000306
Vnn1	vanin 1	0.000307
Mapk8	mitogen-activated protein kinase 8	0.000308
Ric8b	resistance to inhibitors of cholinesterase 8 homolog B (C. elegans)	0.00031
Tollip	toll interacting protein	0.00031
Src	Rous sarcoma oncogene	0.000311
Rps6ka1	ribosomal protein S6 kinase polypeptide 1	0.000312
Galnt13	UDP-N-acetyl-alpha-D-galactosamine:polypeptide N-acetylgalactosaminyltransferase 13	0.000313
Pcyt2	phosphate cytidylyltransferase 2, ethanolamine	0.000314
Rorc	RAR-related orphan receptor gamma	0.000314
Chrm4	cholinergic receptor, muscarinic 4	0.000315
Sh3yl1	Sh3 domain YSC-like 1	0.000321
Lass4	LAG1 homolog, ceramide synthase 4	0.000325
Rbms2	RNA binding motif, single stranded interacting protein 2	0.000328
Stat5a	signal transducer and activator of transcription 5A	0.000329
Tnrc6c	trinucleotide repeat containing 6C	0.000334
Il1f8	interleukin 1 family, member 8	0.000341
Pars2	prolyl-tRNA synthetase (mitochondrial)(putative)	0.000341
Ppard	peroxisome proliferator activator receptor delta	0.000347
Il1r2	interleukin 1 receptor, type II	0.000348
St8sia5	ST8 alpha-N-acetyl-neuraminide alpha-2,8-sialyltransferase 5	0.000349
Itpk1	inositol 1,3,4-triphosphate 5/6 kinase	0.000349
Them5	thioesterase superfamily member 5	0.000352
Uhmk1	U2AF homology motif (UHM) kinase 1	0.000352
Cbx8	chromobox homolog 8 (Drosophila Pc class)	0.000354
Nr5a1	nuclear receptor subfamily 5, group A, member 1	0.000354
Fmo1	flavin containing monooxygenase 1	0.000355
Dnajc5g	DnaJ (Hsp40) homolog, subfamily C, member 5 gamma	0.000357
Zc3h10	zinc finger CCCH type containing 10	0.000358
Syngr2	synaptogyrin 2	0.00036
Cenpe	centromere protein E	0.000361
Gpr17	G protein-coupled receptor 17	0.000361
Klk9	kallikrein related-peptidase 9	0.000362
Mmp15	matrix metallopeptidase 15	0.000363
Klhl4	kelch-like 4 (Drosophila)	0.000365
Krt82	keratin 82	0.000369
Rnf168	ring finger protein 168	0.000371
Ascc3	activating signal cointegrator 1 complex subunit 3	0.000371
Fbxo16	F-box protein 16	0.000372
Teddm1	transmembrane epididymal protein 1	0.000374
Crabp1	cellular retinoic acid binding protein I	0.000379
Art4	ADP-ribosyltransferase 4	0.00038
Olfml1	olfactomedin-like 1	0.000382
Cpt1b	carnitine palmitoyltransferase 1b, muscle	0.000384
Kir3dl1	killer cell immunoglobulin-like receptor, three domains, long cytoplasmic tail, 1	0.000385
Prol1	proline rich, lacrimal 1	0.000389
Asah1	N-acylsphingosine amidohydrolase 1	0.000389
Snph	syntaphilin	0.000391
Ager	advanced glycosylation end product-specific receptor	0.000392
Epx	eosinophil peroxidase	0.000392
Arsa	arylsulfatase A	0.000396
Hip1r	huntingtin interacting protein 1 related	0.000396
Prkdc	protein kinase, DNA activated, catalytic polypeptide	0.000397
Esrrg	estrogen-related receptor gamma	0.000397
Cntrob	centrobin, centrosomal BRCA2 interacting protein	0.000397
Cdh23	cadherin 23 (otocadherin)	0.0004
Unc93a	---	0.000401
Tnfrsf18	tumor necrosis factor receptor superfamily, member 18	0.000402
Dcbld1	discoidin, CUB and LCCL domain containing 1	0.000402
Ctsg	cathepsin G	0.000403
Solh	small optic lobes homolog (Drosophila)	0.000403
Pskh1	protein serine kinase H1	0.000404
Slc4a3	solute carrier family 4 (anion exchanger), member 3	0.000409
Pole	polymerase (DNA directed), epsilon	0.000412
Tnpo2	transportin 2 (importin 3, karyopherin beta 2b)	0.000412
Itgam	integrin alpha M	0.000413
Iqsec1	IQ motif and Sec7 domain 1	0.000413
Oxr1	oxidation resistance 1	0.000414
Gfi1b	growth factor independent 1B	0.000416
Ppargc1a	peroxisome proliferative activated receptor, gamma, coactivator 1 alpha	0.000416
Bmp10	bone morphogenetic protein 10	0.000417
Slamf8	SLAM family member 8	0.000417
St6galnac1	ST6 (alpha-N-acetyl-neuraminyl-2,3-beta-galactosyl-1,3)-N-acetylgalactosaminide alpha-2,6-sialyltransferase 1	0.000417
Wnt2	wingless-related MMTV integration site 2	0.000417
Cacng5	calcium channel, voltage-dependent, gamma subunit 5	0.000419
Syt5	synaptotagmin V	0.00042
Hrh2	histamine receptor H2	0.00042
Tmem86a	transmembrane protein 86A	0.000422
Adamtsl4	ADAMTS-like 4	0.000422
Ptger3	prostaglandin E receptor 3 (subtype EP3)	0.000424
Crot	carnitine O-octanoyltransferase	0.000425
Mefv	Mediterranean fever	0.000428
Trem1	triggering receptor expressed on myeloid cells 1	0.00043
Wwtr1	WW domain containing transcription regulator 1	0.00043
Capn12	calpain 12	0.000431
Ghsr	growth hormone secretagogue receptor	0.000435
Ccrl2	chemokine (C-C motif) receptor-like 2	0.000436
Il1f6	interleukin 1 family, member 6	0.000437
Gcet2	germinal center expressed transcript 2	0.000438
Foxk1	forkhead box K1	0.000438
Acad9	acyl-Coenzyme A dehydrogenase family, member 9	0.00044
Rad9b	RAD9 homolog B (S. cerevisiae)	0.000441
Snx8	sorting nexin 8	0.000441
Slc44a4	solute carrier family 44, member 4	0.000445
Creb5	cAMP responsive element binding protein 5	0.000446
Als2cl	ALS2 C-terminal like	0.000447
Sirt2	sirtuin 2 (silent mating type information regulation 2, homolog) 2 (S. cerevisiae)	0.000451
Pkp1	plakophilin 1	0.000451
Usp54	ubiquitin specific peptidase 54	0.000454
Mllt6	myeloid/lymphoid or mixed-lineage leukemia (trithorax homolog, Drosophila); translocated to, 6	0.000455
Pof1b	premature ovarian failure 1B	0.000459
Sema3f	sema domain, immunoglobulin domain (Ig), short basic domain, secreted, (semaphorin) 3F	0.00046
Slc15a3	solute carrier family 15, member 3	0.000461
Serinc5	serine incorporator 5	0.000462
Abhd2	abhydrolase domain containing 2	0.000463
Ftmt	ferritin mitochondrial	0.000464
Aoc2	amine oxidase, copper containing 2 (retina-specific)	0.000466
Fn3k	fructosamine 3 kinase	0.000467
Gpr156	G protein-coupled receptor 156	0.000469
Eif2c2	eukaryotic translation initiation factor 2C, 2	0.000474
Pax3	paired box gene 3	0.000474
Rnf121	---	0.000478
Fbxo17	F-box protein 17	0.000487
Cxxc5	CXXC finger 5	0.000489
Rnd1	Rho family GTPase 1	0.000491
Sim1	single-minded homolog 1 (Drosophila)	0.000493
Igf1r	insulin-like growth factor I receptor	0.000495
Ptk6	PTK6 protein tyrosine kinase 6	0.000495
Agbl3	ATP/GTP binding protein-like 3	0.000498
Cd163	CD163 antigen	0.0005
Brip1	BRCA1 interacting protein C-terminal helicase 1	0.000505
Mmp11	matrix metallopeptidase 11	0.000512
Crybb2	crystallin, beta B2	0.000514
Ankrd43	ankyrin repeat domain 43	0.000515
Slc17a6	solute carrier family 17 (sodium-dependent inorganic phosphate cotransporter), member 6	0.000516
Kirrel	kin of IRRE like (Drosophila)	0.000517
Otop1	otopetrin 1	0.000517
Tlr2	toll-like receptor 2	0.000518
Chl1	cell adhesion molecule with homology to L1CAM	0.000519
Oas2	2'-5' oligoadenylate synthetase 2	0.000521
St6gal2	beta galactoside alpha 2,6 sialyltransferase 2	0.000526
Tspyl4	TSPY-like 4	0.000528
Slc22a13	solute carrier family 22 (organic cation transporter), member 13	0.000528
Snx15	sorting nexin 15	0.000529
Cnot4	CCR4-NOT transcription complex, subunit 4	0.00053
Slc22a18	solute carrier family 22 (organic cation transporter), member 18	0.000531
Olr1	oxidized low density lipoprotein (lectin-like) receptor 1	0.000532
Mc5r	melanocortin 5 receptor	0.000532
Adamts7	a disintegrin-like and metallopeptidase (reprolysin type) with thrombospondin type 1 motif, 7	0.000535
Arhgap30	Rho GTPase activating protein 30	0.000536
H19	H19 fetal liver mRNA	0.000537
Alg3	asparagine-linked glycosylation 3 homolog (yeast, alpha-1,3-mannosyltransferase)	0.000539
Psors1c2	psoriasis susceptibility 1 candidate 2 (human)	0.000539
Trak1	trafficking protein, kinesin binding 1	0.00054
Ier5l	immediate early response 5-like	0.00054
Ush1c	Usher syndrome 1C homolog (human)	0.000542
B4galnt1	beta-1,4-N-acetyl-galactosaminyl transferase 1	0.000545
Stab2	stabilin 2	0.000546
Ctcf	CCCTC-binding factor	0.000548
Tpmt	thiopurine methyltransferase	0.000548
Mef2d	myocyte enhancer factor 2D	0.00055
Adprhl1	ADP-ribosylhydrolase like 1	0.000551
Fam20c	family with sequence similarity 20, member C	0.000551
Limd2	LIM domain containing 2	0.000553
Sez6	seizure related gene 6	0.000554
Ercc2	excision repair cross-complementing rodent repair deficiency, complementation group 2	0.000554
Foxn1	forkhead box N1	0.000555
Stac	src homology three (SH3) and cysteine rich domain	0.000557
Trhr	thyrotropin releasing hormone receptor	0.000558
Robo1	roundabout homolog 1 (Drosophila)	0.000558
Trpa1	transient receptor potential cation channel, subfamily A, member 1	0.000562
Gnao1	guanine nucleotide binding protein, alpha O	0.000565
Slc39a14	solute carrier family 39 (zinc transporter), member 14	0.000566
Ints6	integrator complex subunit 6	0.00057
Tcf23	transcription factor 23	0.000572
Ccdc69	coiled-coil domain containing 69	0.000572
Cabp5	calcium binding protein 5	0.000575
Pax9	paired box gene 9	0.000575
Il24	interleukin 24	0.000577
Lrrc18	leucine rich repeat containing 18	0.000578
Wwox	WW domain-containing oxidoreductase	0.00058
Dffb	DNA fragmentation factor, beta subunit	0.000583
Epha4	Eph receptor A4	0.000583
Cachd1	cache domain containing 1	0.000585
E2f1	E2F transcription factor 1	0.000587
Wdr73	WD repeat domain 73	0.000589
Hfe	hemochromatosis	0.000589
Fam105b	family with sequence similarity 105, member B	0.000589
Slc5a1	solute carrier family 5 (sodium/glucose cotransporter), member 1	0.000591
Trim25	tripartite motif-containing 25	0.000593
Rap1gap	Rap1 GTPase-activating protein	0.000594
Hmgcll1	3-hydroxymethyl-3-methylglutaryl-Coenzyme A lyase-like 1	0.000595
Tekt2	tektin 2	0.000596
Pcbd1	pterin 4 alpha carbinolamine dehydratase/dimerization cofactor of hepatocyte nuclear factor 1 alpha (TCF1) 1	0.000597
Rnf5	ring finger protein 5	0.000598
Oscar	osteoclast associated receptor	0.000598
Mkx	mohawk homeobox	0.000602
Dio1	deiodinase, iodothyronine, type I	0.000604
Hoxa6	homeo box A6	0.000607
Foxred1	FAD-dependent oxidoreductase domain containing 1	0.000607
Lct	lactase	0.00061
Vgll2	vestigial like 2 homolog (Drosophila)	0.000611
Zcchc3	zinc finger, CCHC domain containing 3	0.000612
Dusp19	dual specificity phosphatase 19	0.000613
Adamts16	a disintegrin-like and metallopeptidase (reprolysin type) with thrombospondin type 1 motif, 16	0.000615
Snta1	syntrophin, acidic 1	0.000616
Mbd3l1	methyl-CpG binding domain protein 3-like 1	0.000622
Fn1	fibronectin 1	0.000623
Prkcd	protein kinase C, delta	0.000624
Dym	dymeclin	0.000625
Myoz2	myozenin 2	0.00063
Adam8	a disintegrin and metallopeptidase domain 8	0.00063
Atrnl1	attractin like 1	0.000635
Akr1d1	aldo-keto reductase family 1, member D1	0.000635
Fam117a	family with sequence similarity 117, memberA	0.000636
Gas2l1	growth arrest-specific 2 like 1	0.000636
Rtn4r	reticulon 4 receptor	0.000636
Pctk3	PCTAIRE-motif protein kinase 3	0.000641
Btc	betacellulin, epidermal growth factor family member	0.000644
Stx1a	syntaxin 1A (brain)	0.000647
Rhou	ras homolog gene family, member U	0.000647
Pik3r5	phosphoinositide-3-kinase, regulatory subunit 5, p101	0.000647
Pnliprp2	pancreatic lipase-related protein 2	0.000648
Thrb	thyroid hormone receptor beta	0.000649
Doc2b	double C2, beta	0.00065
Tubb2c	---	0.000652
Plekhg6	pleckstrin homology domain containing, family G (with RhoGef domain) member 6	0.000652
Phf20	PHD finger protein 20	0.000653
Atpaf2	ATP synthase mitochondrial F1 complex assembly factor 2	0.000654
Hdac5	histone deacetylase 5	0.000654
Recql5	RecQ protein-like 5	0.000655
Tle6	transducin-like enhancer of split 6, homolog of Drosophila E(spl)	0.000656
Nudt12	nudix (nucleoside diphosphate linked moiety X)-type motif 12	0.000658
Slc13a3	solute carrier family 13 (sodium-dependent dicarboxylate transporter), member 3	0.00066
Amdhd2	amidohydrolase domain containing 2	0.000665
Ascl1	achaete-scute complex homolog 1 (Drosophila)	0.000666
Hbq1	hemoglobin, theta 1	0.00067
Gabre	gamma-aminobutyric acid (GABA) A receptor, subunit epsilon	0.00067
Gpr45	G protein-coupled receptor 45	0.000673
Ptplb	protein tyrosine phosphatase-like (proline instead of catalytic arginine), member b	0.000675
Fam53b	family with sequence similarity 53, member B	0.000676
Umodl1	uromodulin-like 1	0.000678
Ppy	pancreatic polypeptide	0.000681
Dnajc4	DnaJ (Hsp40) homolog, subfamily C, member 4	0.000683
Dennd2a	DENN/MADD domain containing 2A	0.000684
Dand5	DAN domain family, member 5	0.000686
Nr1d1	nuclear receptor subfamily 1, group D, member 1	0.000688
Taldo1	transaldolase 1	0.00069
Dok1	docking protein 1	0.000691
Prep	prolyl endopeptidase	0.000693
Lilrb4	leukocyte immunoglobulin-like receptor, subfamily B, member 4	0.000693
Il8ra	interleukin 8 receptor, alpha	0.000693
Impdh1	inosine 5'-phosphate dehydrogenase 1	0.000696
Atxn7	ataxin 7	0.000699
Mobp	myelin-associated oligodendrocytic basic protein	0.000699
Pbx2	pre B-cell leukemia transcription factor 2	0.000701
Ttc9b	tetratricopeptide repeat domain 9B	0.000704
Nme6	non-metastatic cells 6, protein expressed in (nucleoside-diphosphate kinase)	0.000705
Nfam1	Nfat activating molecule with ITAM motif 1	0.000707
Ppp1r1a	protein phosphatase 1, regulatory (inhibitor) subunit 1A	0.000708
Rab22a	RAB22A, member RAS oncogene family	0.000708
Pde4d	phosphodiesterase 4D, cAMP specific	0.00071
Tox	thymocyte selection-associated high mobility group box	0.000711
Gcc1	golgi coiled coil 1	0.000711
Cntnap4	contactin associated protein-like 4	0.000711
Syt15	synaptotagmin XV	0.000714
Foxn4	forkhead box N4	0.000715
Sprr1b	small proline-rich protein 1B	0.00072
Lgi4	leucine-rich repeat LGI family, member 4	0.00072
Slc8a3	solute carrier family 8 (sodium/calcium exchanger), member 3	0.000723
Actg2	actin, gamma 2, smooth muscle, enteric	0.000725
Frmd4a	FERM domain containing 4A	0.000728
Accn1	amiloride-sensitive cation channel 1, neuronal (degenerin)	0.00073
Gpr135	G protein-coupled receptor 135	0.000731
Gsg1	germ cell-specific gene 1	0.000734
Slc16a14	solute carrier family 16 (monocarboxylic acid transporters), member 14	0.00074
Nudt4	nudix (nucleoside diphosphate linked moiety X)-type motif 4	0.000741
Cdh3	cadherin 3	0.000743
Krit1	KRIT1, ankyrin repeat containing	0.000743
Hspb8	heat shock protein 8	0.00075
Trim14	tripartite motif-containing 14	0.000752
Retn	resistin	0.000753
Ifna2	interferon alpha 2	0.000756
Gprc6a	G protein-coupled receptor, family C, group 6, member A	0.000757
Slc26a9	solute carrier family 26, member 9	0.000757
Rg9mtd1	RNA (guanine-9-) methyltransferase domain containing 1	0.000761
Scgb1a1	secretoglobin, family 1A, member 1 (uteroglobin)	0.000761
Ttll6	tubulin tyrosine ligase-like family, member 6	0.000761
Ntrk2	neurotrophic tyrosine kinase, receptor, type 2	0.000762
Lipi	lipase, member I	0.000763
Ezh2	enhancer of zeste homolog 2 (Drosophila)	0.000764
Clcnkb	chloride channel Kb	0.000767
Neto2	neuropilin (NRP) and tolloid (TLL)-like 2	0.000767
Npc1l1	NPC1-like 1	0.00077
Slc35e1	solute carrier family 35, member E1	0.00077
Fetub	fetuin beta	0.000773
Matn4	matrilin 4	0.000777
Sycp1	synaptonemal complex protein 1	0.000779
Nsun5	NOL1/NOP2/Sun domain family, member 5	0.00078
Cchcr1	coiled-coil alpha-helical rod protein 1	0.000784
Gpr158	G protein-coupled receptor 158	0.000789
Nupr1	nuclear protein 1	0.00079
Akap9	A kinase (PRKA) anchor protein (yotiao) 9	0.000791
Zan	zonadhesin	0.0008
Hic2	hypermethylated in cancer 2	0.0008
Casc5	cancer susceptibility candidate 5	0.0008
Ltbp3	latent transforming growth factor beta binding protein 3	0.000801
Pxt1	peroxisomal, testis specific 1	0.000801
Rtp1	receptor transporter protein 1	0.000801
Krt6b	keratin 6B	0.000802
Kcne1l	potassium voltage-gated channel, Isk-related family, member 1-like	0.000805
Abi3	ABI gene family, member 3	0.000807
Rerg	RAS-like, estrogen-regulated, growth-inhibitor	0.000808
Abcc6	ATP-binding cassette, sub-family C (CFTR/MRP), member 6	0.000808
Efs	embryonal Fyn-associated substrate	0.000809
Tlx1	T-cell leukemia, homeobox 1	0.000814
Kcne1	potassium voltage-gated channel, Isk-related subfamily, member 1	0.000815
Pnpo	pyridoxine 5'-phosphate oxidase	0.000822
Dtna	dystrobrevin alpha	0.000825
Msx2	homeobox, msh-like 2	0.000825
Sdc1	syndecan 1	0.000826
Cd86	CD86 antigen	0.000828
Upb1	ureidopropionase, beta	0.000831
Lrrc2	leucine rich repeat containing 2	0.000833
Usf2	upstream transcription factor 2	0.000835
Dennd1a	DENN/MADD domain containing 1A	0.000837
Lamp1	lysosomal-associated membrane protein 1	0.000838
Tlx3	T-cell leukemia, homeobox 3	0.000838
Gcm1	glial cells missing homolog 1 (Drosophila)	0.000839
Thra	thyroid hormone receptor alpha	0.000842
Bmpr1b	bone morphogenetic protein receptor, type 1B	0.000843
Cnot1	CCR4-NOT transcription complex, subunit 1	0.000853
Slc11a2	solute carrier family 11 (proton-coupled divalent metal ion transporters), member 2	0.000855
Wipi2	WD repeat domain, phosphoinositide interacting 2	0.000855
Dok4	docking protein 4	0.000856
Tusc5	tumor suppressor candidate 5	0.000856
St18	suppression of tumorigenicity 18	0.00086
Myl7	myosin, light polypeptide 7, regulatory	0.000861
Tmub1	transmembrane and ubiquitin-like domain containing 1	0.000864
Pdpk1	3-phosphoinositide dependent protein kinase-1	0.000865
Gabrq	gamma-aminobutyric acid (GABA) A receptor, subunit theta	0.000866
Tle4	transducin-like enhancer of split 4, homolog of Drosophila E(spl)	0.000868
Cryab	crystallin, alpha B	0.000869
Serpinb5	serine (or cysteine) peptidase inhibitor, clade B, member 5	0.000869
E2f2	E2F transcription factor 2	0.000871
Lypd4	Ly6/Plaur domain containing 4	0.000873
Pfkfb2	6-phosphofructo-2-kinase/fructose-2,6-biphosphatase 2	0.000873
Cyp1a2	cytochrome P450, family 1, subfamily a, polypeptide 2	0.000875
Sfrs2ip	splicing factor, arginine/serine-rich 2, interacting protein	0.000878
Wnt6	wingless-related MMTV integration site 6	0.000878
Elmo1	engulfment and cell motility 1, ced-12 homolog (C. elegans)	0.00088
Klc2	kinesin light chain 2	0.000884
B3galt4	UDP-Gal:betaGlcNAc beta 1,3-galactosyltransferase, polypeptide 4	0.000886
Actrt2	actin-related protein T2	0.000887
Htr1a	5-hydroxytryptamine (serotonin) receptor 1A	0.000887
Rnpc3	RNA-binding region (RNP1, RRM) containing 3	0.00089
Cma1	chymase 1, mast cell	0.000895
Fam101a	family with sequence similarity 101, member A	0.000898
Lce1c	late cornified envelope 1C	0.0009
Atp2b3	ATPase, Ca++ transporting, plasma membrane 3	0.000902
Ryr3	ryanodine receptor 3	0.000903
Cml2	camello-like 2	0.000914
Zfyve26	zinc finger, FYVE domain containing 26	0.000915
Noxa1	NADPH oxidase activator 1	0.000916
Rnf24	ring finger protein 24	0.000918
Fam57b	family with sequence similarity 57, member B	0.00092
Vgll1	vestigial like 1 homolog (Drosophila)	0.000922
Mds1	myelodysplasia syndrome 1 homolog (human)	0.000923
Supt7l	suppressor of Ty 7 (S. cerevisiae)-like	0.000924
Napsa	napsin A aspartic peptidase	0.000925
Trpt1	tRNA phosphotransferase 1	0.000927
Gpr173	G-protein coupled receptor 173	0.000928
Mat1a	methionine adenosyltransferase I, alpha	0.000929
Phf23	PHD finger protein 23	0.000931
Csrp3	cysteine and glycine-rich protein 3	0.000935
H2afj	H2A histone family, member J	0.000935
Rps6kl1	ribosomal protein S6 kinase-like 1	0.000939
Sphk1	sphingosine kinase 1	0.000939
Dusp16	dual specificity phosphatase 16	0.00094
Kif21a	kinesin family member 21A	0.000949
Barhl2	BarH-like 2 (Drosophila)	0.000953
Golga2	golgi autoantigen, golgin subfamily a, 2	0.000954
Gsta3	glutathione S-transferase, alpha 3	0.000954
Slc17a2	solute carrier family 17 (sodium phosphate), member 2	0.000955
Styx	serine/threonine/tyrosine interaction protein	0.000956
Pip5k1b	phosphatidylinositol-4-phosphate 5-kinase, type 1 beta	0.000956
Prr13	proline rich 13	0.000958
Ncoa3	nuclear receptor coactivator 3	0.00096
Unc84b	unc-84 homolog B (C. elegans)	0.000962
Jarid2	jumonji, AT rich interactive domain 2	0.000965
Csnk1g2	casein kinase 1, gamma 2	0.000966
Rnf10	ring finger protein 10	0.000968
Matn1	matrilin 1, cartilage matrix protein	0.000969
Hist1h3g	histone cluster 1, H3g	0.000973
Fev	FEV (ETS oncogene family)	0.000974
Cyp7a1	cytochrome P450, family 7, subfamily a, polypeptide 1	0.000975
Rps6kb1	ribosomal protein S6 kinase, polypeptide 1	0.000976
Tmc8	transmembrane channel-like gene family 8	0.000976
Sdhc	succinate dehydrogenase complex, subunit C, integral membrane protein	0.000977
Igfbpl1	insulin-like growth factor binding protein-like 1	0.000978
Dlgap2	discs, large (Drosophila) homolog-associated protein 2	0.00098
Epha10	Eph receptor A10	0.000981
Gpr75	G protein-coupled receptor 75	0.000987
Bcl2l1	BCL2-like 1	0.000988
Napb	N-ethylmaleimide sensitive fusion protein attachment protein beta	0.000988
F2rl3	coagulation factor II (thrombin) receptor-like 3	0.000995
Tmem30a	transmembrane protein 30A	0.000997
Dmrtc2	doublesex and mab-3 related transcription factor like family C2	0.000997
Obscn	obscurin, cytoskeletal calmodulin and titin-interacting RhoGEF	0.000998
Evc	Ellis van Creveld gene homolog (human)	0.001
Uxs1	UDP-glucuronate decarboxylase 1	0.00101
Gnmt	glycine N-methyltransferase	0.00101
Pga5	pepsinogen 5, group I	0.00102
C2	complement component 2 (within H-2S)	0.00102
Tmprss5	transmembrane protease, serine 5 (spinesin)	0.00103
Tinag	tubulointerstitial nephritis antigen	0.00103
Per3	period homolog 3 (Drosophila)	0.00103
Ganab	alpha glucosidase 2 alpha neutral subunit	0.00104
Ngb	neuroglobin	0.00104
Sema6b	sema domain, transmembrane domain (TM), and cytoplasmic domain, (semaphorin) 6B	0.00104
E2f4	E2F transcription factor 4	0.00105
Irx4	Iroquois related homeobox 4 (Drosophila)	0.00105
Mpp2	membrane protein, palmitoylated 2 (MAGUK p55 subfamily member 2)	0.00105
Nrxn3	neurexin III	0.00105
Parp14	poly (ADP-ribose) polymerase family, member 14	0.00105
Plxnb1	plexin B1	0.00105
P2ry6	pyrimidinergic receptor P2Y, G-protein coupled, 6	0.00106
Tnp2	transition protein 2	0.00106
Zmym3	zinc finger, MYM-type 3	0.00106
Aldh4a1	aldehyde dehydrogenase 4 family, member A1	0.00107
Angptl2	angiopoietin-like 2	0.00107
Ces2	carboxylesterase 2	0.00107
Slc6a2	solute carrier family 6 (neurotransmitter transporter, noradrenalin), member 2	0.00108
Kctd7	potassium channel tetramerisation domain containing 7	0.00108
Ephb6	Eph receptor B6	0.00108
Clca2	chloride channel calcium activated 2	0.00108
B3galt2	UDP-Gal:betaGlcNAc beta 1,3-galactosyltransferase, polypeptide 2	0.00108
Acpp	acid phosphatase, prostate	0.00108
Abhd11	abhydrolase domain containing 11	0.00108
Slc16a3	solute carrier family 16 (monocarboxylic acid transporters), member 3	0.00109
Six6	sine oculis-related homeobox 6 homolog (Drosophila)	0.00109
Hapln4	hyaluronan and proteoglycan link protein 4	0.00109
Gtse1	G two S phase expressed protein 1	0.00109
Padi1	peptidyl arginine deiminase, type I	0.0011
Ccdc38	coiled-coil domain containing 38	0.0011
Dspp	dentin sialophosphoprotein	0.00111
Arrb2	arrestin, beta 2	0.00112
Gabra2	gamma-aminobutyric acid (GABA) A receptor, subunit alpha 2	0.00112
Mtmr6	myotubularin related protein 6	0.00112
Pcyox1	prenylcysteine oxidase 1	0.00112
Syt9	synaptotagmin IX	0.00112
Daam2	dishevelled associated activator of morphogenesis 2	0.00113
Evl	Ena-vasodilator stimulated phosphoprotein	0.00113
Tagln3	transgelin 3	0.00113
Cckar	cholecystokinin A receptor	0.00114
Cirh1a	cirrhosis, autosomal recessive 1A (human)	0.00114
Fosl2	fos-like antigen 2	0.00114
Maff	v-maf musculoaponeurotic fibrosarcoma oncogene family, protein F (avian)	0.00114
Sorbs1	sorbin and SH3 domain containing 1	0.00114
Cbx6	chromobox homolog 6	0.00115
Fbxl14	F-box and leucine-rich repeat protein 14	0.00115
Il1rap	interleukin 1 receptor accessory protein	0.00115
Nr4a1	nuclear receptor subfamily 4, group A, member 1	0.00115
Tnfsf8	tumor necrosis factor (ligand) superfamily, member 8	0.00116
Myo1f	myosin IF	0.00116
Msra	methionine sulfoxide reductase A	0.00116
Foxp3	forkhead box P3	0.00116
Ppp1r16a	protein phosphatase 1, regulatory (inhibitor) subunit 16A	0.00117
Ncoa7	nuclear receptor coactivator 7	0.00117
Avpr2	arginine vasopressin receptor 2	0.00117
Fgfr3	fibroblast growth factor receptor 3	0.00118
Zfp41	zinc finger protein 41	0.00119
Tnp1	transition protein 1	0.00119
Slc14a2	solute carrier family 14 (urea transporter), member 2	0.00119
Rgma	RGM domain family, member A	0.00119
Rfx4	regulatory factor X, 4 (influences HLA class II expression)	0.00119
Pld1	phospholipase D1	0.00119
Abcb11	ATP-binding cassette, sub-family B (MDR/TAP), member 11	0.0012
Ap3s2	adaptor-related protein complex 3, sigma 2 subunit	0.0012
Cnih2	cornichon homolog 2 (Drosophila)	0.0012
Ern2	endoplasmic reticulum (ER) to nucleus signalling 2	0.0012
G6pc	glucose-6-phosphatase, catalytic	0.0012
Gpr37l1	G protein-coupled receptor 37-like 1	0.0012
Spdya	speedy homolog A (Xenopus laevis)	0.0012
Jph3	junctophilin 3	0.00121
Amn	amnionless	0.00122
Il12rb1	interleukin 12 receptor, beta 1	0.00122
Pnma3	paraneoplastic antigen MA3	0.00122
Cdh10	cadherin 10	0.00123
Kcng3	potassium voltage-gated channel, subfamily G, member 3	0.00123
Pcdhb13	protocadherin beta 13	0.00123
Rgs8	regulator of G-protein signaling 8	0.00123
Usp28	ubiquitin specific peptidase 28	0.00123
Kcnj1	potassium inwardly-rectifying channel, subfamily J, member 1	0.00124
Smoc1	SPARC related modular calcium binding 1	0.00124
Sohlh1	spermatogenesis and oogenesis specific basic helix-loop-helix 1	0.00124
Ppif	peptidylprolyl isomerase F (cyclophilin F)	0.00125
Kif5a	kinesin family member 5A	0.00125
Arhgef15	Rho guanine nucleotide exchange factor (GEF) 15	0.00125
Tmem19	transmembrane protein 19	0.00126
Nf1	neurofibromatosis 1	0.00126
Mlf1	myeloid leukemia factor 1	0.00126
Lass5	LAG1 homolog, ceramide synthase 5	0.00126
Crtc2	CREB regulated transcription coactivator 2	0.00126
Lamc3	laminin gamma 3	0.00127
Exoc5	exocyst complex component 5	0.00127
Dhx34	DEAH (Asp-Glu-Ala-His) box polypeptide 34	0.00127
Tmed4	transmembrane emp24 protein transport domain containing 4	0.00128
Stat2	signal transducer and activator of transcription 2	0.00128
Panx2	pannexin 2	0.00128
Mllt1	myeloid/lymphoid or mixed-lineage leukemia (trithorax homolog, Drosophila); translocated to, 1	0.00128
Hoxc6	homeo box C6	0.00128
Dbp	D site albumin promoter binding protein	0.00128
Cenpi	centromere protein I	0.00129
Mmp19	matrix metallopeptidase 19	0.00129
Mxra8	matrix-remodelling associated 8	0.00129
Tcof1	Treacher Collins Franceschetti syndrome 1, homolog	0.00129
Bmp1	bone morphogenetic protein 1	0.0013
Coil	coilin	0.0013
Loxl2	lysyl oxidase-like 2	0.0013
Lzts2	leucine zipper, putative tumor suppressor 2	0.0013
Tex101	testis expressed gene 101	0.0013
Gna13	guanine nucleotide binding protein, alpha 13	0.00131
Slc39a13	solute carrier family 39 (metal ion transporter), member 13	0.00131
Hmga1	high mobility group AT-hook 1	0.00132
Lce1f	late cornified envelope 1F	0.00132
Nexn	nexilin	0.00132
Runx1t1	runt-related transcription factor 1; translocated to, 1 (cyclin D-related)	0.00132
Wdr90	WD repeat domain 90	0.00133
Slc2a1	solute carrier family 2 (facilitated glucose transporter), member 1	0.00133
Mael	maelstrom homolog (Drosophila)	0.00134
Slc24a2	solute carrier family 24 (sodium/potassium/calcium exchanger), member 2	0.00135
Pqlc1	PQ loop repeat containing 1	0.00135
Pcdhb12	protocadherin beta 12	0.00135
Grpel2	GrpE-like 2, mitochondrial	0.00135
Aqp2	aquaporin 2	0.00135
Alox12	arachidonate 12-lipoxygenase	0.00135
Tnfrsf13c	---	0.00136
Pigr	polymeric immunoglobulin receptor	0.00136
Mafa	v-maf musculoaponeurotic fibrosarcoma oncogene family, protein A (avian)	0.00136
Gfra2	glial cell line derived neurotrophic factor family receptor alpha 2	0.00136
Cntn2	contactin 2	0.00136
Cdc42	cell division cycle 42 homolog (S. cerevisiae)	0.00136
Dab1	disabled homolog 1 (Drosophila)	0.00137
Pcyt1b	phosphate cytidylyltransferase 1, choline, beta isoform	0.00137
Prkaca	protein kinase, cAMP dependent, catalytic, alpha	0.00137
Rps6kb2	ribosomal protein S6 kinase, polypeptide 2	0.00137
Sirpa	signal-regulatory protein alpha	0.00137
Glis3	GLIS family zinc finger 3	0.00138
Mad1l1	mitotic arrest deficient 1-like 1	0.00138
Nppa	natriuretic peptide precursor type A	0.00138
Pcmtd1	protein-L-isoaspartate (D-aspartate) O-methyltransferase domain containing 1	0.00138
Cort	cortistatin	0.00139
Depdc5	DEP domain containing 5	0.00139
Suv420h2	suppressor of variegation 4-20 homolog 2 (Drosophila)	0.00139
Tff2	trefoil factor 2 (spasmolytic protein 1)	0.00139
Akna	AT-hook transcription factor	0.0014
Aldh5a1	aldhehyde dehydrogenase family 5, subfamily A1	0.0014
Tceb3	transcription elongation factor B (SIII), polypeptide 3	0.0014
Rapsn	receptor-associated protein of the synapse	0.00141
Lsamp	limbic system-associated membrane protein	0.00141
Klk8	kallikrein related-peptidase 8	0.00141
Itga11	integrin alpha 11	0.00141
Gnrhr	gonadotropin releasing hormone receptor	0.00141
Atp11a	ATPase, class VI, type 11A	0.00141
Rabgap1l	RAB GTPase activating protein 1-like	0.00142
Nhlrc2	NHL repeat containing 2	0.00142
Hyal3	hyaluronoglucosaminidase 3	0.00142
Lhx3	LIM homeobox protein 3	0.00143
Fam73b	family with sequence similarity 73, member B	0.00143
Ccdc54	coiled-coil domain containing 54	0.00143
Usp22	ubiquitin specific peptidase 22	0.00144
Fmr1nb	fragile X mental retardation 1 neighbor	0.00144
Ghrl	ghrelin	0.00145
Iapp	islet amyloid polypeptide	0.00145
Neu4	sialidase 4	0.00145
Slc39a3	solute carrier family 39 (zinc transporter), member 3	0.00145
Apoa4	apolipoprotein A-IV	0.00146
Brf1	BRF1 homolog, subunit of RNA polymerase III transcription initiation factor IIIB (S. cerevisiae)	0.00146
Neurod2	neurogenic differentiation 2	0.00146
Syt8	synaptotagmin VIII	0.00146
Tubb4	tubulin, beta 4	0.00146
Grid2	glutamate receptor, ionotropic, delta 2	0.00147
Sprn	shadow of prion protein	0.00147
Plxdc1	plexin domain containing 1	0.00148
Spast	spastin	0.00148
Slc45a2	solute carrier family 45, member 2	0.00149
Slc12a7	solute carrier family 12, member 7	0.00149
Rarg	retinoic acid receptor, gamma	0.00149
Mecp2	methyl CpG binding protein 2	0.00149
Pkp2	plakophilin 2	0.0015
Pde4c	phosphodiesterase 4C, cAMP specific	0.0015
Ddr1	discoidin domain receptor family, member 1	0.0015
Ptk2b	PTK2 protein tyrosine kinase 2 beta	0.00151
Pknox1	Pbx/knotted 1 homeobox	0.00151
Lin9	lin-9 homolog (C. elegans)	0.00151
Hbegf	heparin-binding EGF-like growth factor	0.00151
Eif2c1	eukaryotic translation initiation factor 2C, 1	0.00151
Zbtb22	zinc finger and BTB domain containing 22	0.00152
Pou2f3	POU domain, class 2, transcription factor 3	0.00152
Plek2	pleckstrin 2	0.00152
Nat9	N-acetyltransferase 9 (GCN5-related, putative)	0.00152
Lrrc8e	leucine rich repeat containing 8 family, member E	0.00152
Kcnq2	potassium voltage-gated channel, subfamily Q, member 2	0.00152
Il1r1	interleukin 1 receptor, type I	0.00152
Igsf11	immunoglobulin superfamily, member 11	0.00152
Adamts10	a disintegrin-like and metallopeptidase (reprolysin type) with thrombospondin type 1 motif, 10	0.00153
Evpl	envoplakin	0.00153
Hps4	Hermansky-Pudlak syndrome 4 homolog (human)	0.00153
Atf4	activating transcription factor 4	0.00154
Bzrap1	benzodiazapine receptor associated protein 1	0.00154
Echdc2	enoyl Coenzyme A hydratase domain containing 2	0.00154
Pcbp1	poly(rC) binding protein 1	0.00154
Slc2a2	solute carrier family 2 (facilitated glucose transporter), member 2	0.00154
Cd5l	CD5 antigen-like	0.00155
Ghitm	growth hormone inducible transmembrane protein	0.00155
Mkrn3	makorin, ring finger protein, 3	0.00155
Plch2	phospholipase C, eta 2	0.00155
Saps2	SAPS domain family, member 2	0.00155
Trim15	tripartite motif-containing 15	0.00155
Igsf8	immunoglobulin superfamily, member 8	0.00156
Lmbr1l	limb region 1 like	0.00156
Hrasls5	HRAS-like suppressor family, member 5	0.00157
Man2b1	mannosidase 2, alpha B1	0.00157
Mpl	myeloproliferative leukemia virus oncogene	0.00157
Prf1	perforin 1 (pore forming protein)	0.00157
Tagln	transgelin	0.00158
Rp1	retinitis pigmentosa 1 (human)	0.00158
Mef2b	myocyte enhancer factor 2B	0.00158
Atg9b	ATG9 autophagy related 9 homolog B (S. cerevisiae)	0.00158
Vsig1	V-set and immunoglobulin domain containing 1	0.00159
Trpv5	transient receptor potential cation channel, subfamily V, member 5	0.00159
Smg6	Smg-6 homolog, nonsense mediated mRNA decay factor (C. elegans)	0.00159
Cldn16	claudin 16	0.00159
Ascl2	achaete-scute complex homolog 2 (Drosophila)	0.00159
Tbc1d22a	TBC1 domain family, member 22a	0.0016
Mrpl55	mitochondrial ribosomal protein L55	0.00161
Denr	---	0.00162
Pnpla7	patatin-like phospholipase domain containing 7	0.00162
Strn4	striatin, calmodulin binding protein 4	0.00162
Icam5	intercellular adhesion molecule 5, telencephalin	0.00163
Polq	polymerase (DNA directed), theta	0.00163
Tmem143	transmembrane protein 143	0.00163
Asb4	ankyrin repeat and SOCS box-containing 4	0.00164
Cobl	cordon-bleu	0.00164
Pax1	paired box gene 1	0.00164
Chrnb1	cholinergic receptor, nicotinic, beta polypeptide 1 (muscle)	0.00165
Foxd2	forkhead box D2	0.00166
Adora1	adenosine A1 receptor	0.00166
Itih5	inter-alpha (globulin) inhibitor H5	0.00167
Il17re	interleukin 17 receptor E	0.00167
Grap	GRB2-related adaptor protein	0.00167
Uaca	uveal autoantigen with coiled-coil domains and ankyrin repeats	0.00168
Spata3	spermatogenesis associated 3	0.00168
Adipoq	adiponectin, C1Q and collagen domain containing	0.00168
Padi4	peptidyl arginine deiminase, type IV	0.00169
Otor	otoraplin	0.00169
Ms4a2	membrane-spanning 4-domains, subfamily A, member 2	0.00169
Trpm6	transient receptor potential cation channel, subfamily M, member 6	0.0017
Dlat	dihydrolipoamide S-acetyltransferase (E2 component of pyruvate dehydrogenase complex)	0.00171
Triobp	TRIO and F-actin binding protein	0.00171
Ffar2	free fatty acid receptor 2	0.00172
Mxd4	Max dimerization protein 4	0.00172
Cd300lg	CD300 antigen like family member G	0.00173
Hivep3	human immunodeficiency virus type I enhancer binding protein 3	0.00173
Smyd1	SET and MYND domain containing 1	0.00173
Tnfrsf9	tumor necrosis factor receptor superfamily, member 9	0.00173
Slc24a3	solute carrier family 24 (sodium/potassium/calcium exchanger), member 3	0.00174
Ryr2	ryanodine receptor 2, cardiac	0.00174
Rhbdl2	rhomboid, veinlet-like 2 (Drosophila)	0.00174
Lrrc25	leucine rich repeat containing 25	0.00174
Il9r	interleukin 9 receptor	0.00174
Sgcd	sarcoglycan, delta (dystrophin-associated glycoprotein)	0.00176
Senp3	SUMO/sentrin specific peptidase 3	0.00176
Rnf167	ring finger protein 167	0.00176
Tinagl1	tubulointerstitial nephritis antigen-like 1	0.00177
Ppm1f	protein phosphatase 1F (PP2C domain containing)	0.00177
Cdt1	chromatin licensing and DNA replication factor 1	0.00178
Ldhc	lactate dehydrogenase C	0.00178
Cel	carboxyl ester lipase	0.00179
Cttnbp2nl	CTTNBP2 N-terminal like	0.00179
Osmr	oncostatin M receptor	0.00179
Tdrd6	tudor domain containing 6	0.00179
Timp2	tissue inhibitor of metalloproteinase 2	0.00179
Ube2g2	ubiquitin-conjugating enzyme E2G 2	0.0018
Foxa3	forkhead box A3	0.00181
Wfdc12	WAP four-disulfide core domain 12	0.00182
Fhl5	four and a half LIM domains 5	0.00182
Abca4	ATP-binding cassette, sub-family A (ABC1), member 4	0.00182
Socs3	suppressor of cytokine signaling 3	0.00183
Sh3gl1	SH3-domain GRB2-like 1	0.00183
Mrps18b	mitochondrial ribosomal protein S18B	0.00183
Magee1	melanoma antigen, family E, 1	0.00183
Pdzk1ip1	PDZK1 interacting protein 1	0.00184
Cfc1	cripto, FRL-1, cryptic family 1	0.00184
Slc17a4	solute carrier family 17 (sodium phosphate), member 4	0.00185
Elmo3	engulfment and cell motility 3, ced-12 homolog (C. elegans)	0.00185
Bcorl1	BCL6 co-repressor-like 1	0.00185
Atp4b	ATPase, H+/K+ exchanging, beta polypeptide	0.00185
rp9	retinitis pigmentosa 9 (human)	0.00186
Rxfp4	relaxin family peptide receptor 4	0.00186
Igfbp2	insulin-like growth factor binding protein 2	0.00186
Epha3	Eph receptor A3	0.00186
Ccdc86	coiled-coil domain containing 86	0.00186
Anxa8	annexin A8	0.00187
Glra1	glycine receptor, alpha 1 subunit	0.00187
Ksr1	kinase suppressor of ras 1	0.00187
Scara3	scavenger receptor class A, member 3	0.00187
Bmp15	bone morphogenetic protein 15	0.00188
Gpr128	G protein-coupled receptor 128	0.00188
Gpr3	G-protein coupled receptor 3	0.00188
Ptgir	prostaglandin I receptor (IP)	0.00188
Anapc5	anaphase-promoting complex subunit 5	0.00189
N4bp1	NEDD4 binding protein 1	0.00189
Aqp5	aquaporin 5	0.0019
Fbxl12	F-box and leucine-rich repeat protein 12	0.0019
Prm1	protamine 1	0.0019
Serpina6	serine (or cysteine) peptidase inhibitor, clade A, member 6	0.0019
Mmp28	matrix metallopeptidase 28 (epilysin)	0.00191
F8	coagulation factor VIII	0.00191
Atp2a2	ATPase, Ca++ transporting, cardiac muscle, slow twitch 2	0.00191
Prop1	paired like homeodomain factor 1	0.00192
Phf8	PHD finger protein 8	0.00192
Clstn3	calsyntenin 3	0.00192
Epha1	Eph receptor A1	0.00193
Oprm1	opioid receptor, mu 1	0.00194
Hif1an	hypoxia-inducible factor 1, alpha subunit inhibitor	0.00195
Hsh2d	hematopoietic SH2 domain containing	0.00195
Mmp16	matrix metallopeptidase 16	0.00195
Xpnpep2	X-prolyl aminopeptidase (aminopeptidase P) 2, membrane-bound	0.00195
Gngt2	guanine nucleotide binding protein (G protein), gamma transducing activity polypeptide 2	0.00196
Mall	mal, T-cell differentiation protein-like	0.00196
Pom121	nuclear pore membrane protein 121	0.00196
Sac3d1	SAC3 domain containing 1	0.00196
Sox18	SRY-box containing gene 18	0.00196
Th1l	TH1-like homolog (Drosophila)	0.00196
Tlr6	toll-like receptor 6	0.00196
Fzd6	frizzled homolog 6 (Drosophila)	0.00197
Pigc	phosphatidylinositol glycan anchor biosynthesis, class C	0.00197
Tmem106a	transmembrane protein 106A	0.00197
Gtpbp1	GTP binding protein 1	0.00198
Psca	prostate stem cell antigen	0.00199
Prrg4	proline rich Gla (G-carboxyglutamic acid) 4 (transmembrane)	0.00199
Fxyd4	FXYD domain-containing ion transport regulator 4	0.00199
Evi5l	ecotropic viral integration site 5 like	0.00199
Plch1	phospholipase C, eta 1	0.002
Kcnip2	Kv channel-interacting protein 2	0.002
Slc2a4	solute carrier family 2 (facilitated glucose transporter), member 4	0.00201
Senp1	SUMO1/sentrin specific peptidase 1	0.00201
Adamts12	a disintegrin-like and metallopeptidase (reprolysin type) with thrombospondin type 1 motif, 12	0.00201
Prdx3	peroxiredoxin 3	0.00202
Il18rap	interleukin 18 receptor accessory protein	0.00202
Grwd1	glutamate-rich WD repeat containing 1	0.00202
Efnb3	ephrin B3	0.00202
Rara	retinoic acid receptor, alpha	0.00203
Ppp4r2	protein phosphatase 4, regulatory subunit 2	0.00203
Peli2	pellino 2	0.00203
Atoh7	atonal homolog 7 (Drosophila)	0.00203
Ms4a5	membrane-spanning 4-domains, subfamily A, member 5	0.00204
Ccdc96	coiled-coil domain containing 96	0.00204
Wdtc1	WD and tetratricopeptide repeats 1	0.00205
Stox2	storkhead box 2	0.00205
Gsg2	germ cell-specific gene 2	0.00205
Csf1	colony stimulating factor 1 (macrophage)	0.00205
Casp2	caspase 2	0.00206
Aff3	AF4/FMR2 family, member 3	0.00206
Brd2	bromodomain containing 2	0.00207
Grb2	growth factor receptor bound protein 2	0.00207
Otub1	OTU domain, ubiquitin aldehyde binding 1	0.00207
Ahdc1	AT hook, DNA binding motif, containing 1	0.00208
Rax	retina and anterior neural fold homeobox	0.00208
Rrh	retinal pigment epithelium derived rhodopsin homolog	0.00209
Brsk2	BR serine/threonine kinase 2	0.0021
Idh3b	isocitrate dehydrogenase 3 (NAD+) beta	0.0021
Musk	muscle, skeletal, receptor tyrosine kinase	0.0021
Nfat5	nuclear factor of activated T-cells 5	0.0021
Wbp2	WW domain binding protein 2	0.0021
Angptl6	angiopoietin-like 6	0.00211
Fam83a	family with sequence similarity 83, member A	0.00211
Hrg	histidine-rich glycoprotein	0.00211
Itga9	integrin alpha 9	0.00211
Rnf17	ring finger protein 17	0.00211
Scn2b	sodium channel, voltage-gated, type II, beta	0.00211
Spag4l	sperm associated antigen 4-like	0.00211
Creb3l3	cAMP responsive element binding protein 3-like 3	0.00213
Gpr143	G protein-coupled receptor 143	0.00213
Jph2	junctophilin 2	0.00213
Grap2	GRB2-related adaptor protein 2	0.00214
Fam20b	family with sequence similarity 20, member B	0.00215
Eif4e3	eukaryotic translation initiation factor 4E member 3	0.00215
Alx4	aristaless-like homeobox 4	0.00215
Sox10	SRY-box containing gene 10	0.00216
Rph3al	rabphilin 3A-like (without C2 domains)	0.00216
Scn5a	sodium channel, voltage-gated, type V, alpha	0.00217
Cacna1e	calcium channel, voltage-dependent, R type, alpha 1E subunit	0.00217
Mfge8	milk fat globule-EGF factor 8 protein	0.00218
Adrb3	adrenergic receptor, beta 3	0.00218
Tmpo	thymopoietin	0.00219
Qprt	quinolinate phosphoribosyltransferase	0.00219
Rtbdn	retbindin	0.0022
Rgr	retinal G protein coupled receptor	0.0022
Zg16	zymogen granule protein 16	0.00221
Ubqln1	ubiquilin 1	0.00221
Adam22	a disintegrin and metallopeptidase domain 22	0.00221
Tpm2	tropomyosin 2, beta	0.00222
Ror2	receptor tyrosine kinase-like orphan receptor 2	0.00222
Rhcg	Rhesus blood group-associated C glycoprotein	0.00222
Cyp4b1	cytochrome P450, family 4, subfamily b, polypeptide 1	0.00223
Aldh1l1	aldehyde dehydrogenase 1 family, member L1	0.00223
Cyb5r3	cytochrome b5 reductase 3	0.00224
Sh2b2	SH2B adaptor protein 2	0.00224
Sh3rf2	SH3 domain containing ring finger 2	0.00224
Mc3r	melanocortin 3 receptor	0.00225
Aatk	apoptosis-associated tyrosine kinase	0.00226
Foxp4	forkhead box P4	0.00226
Tjp2	tight junction protein 2	0.00226
Tnfrsf11b	tumor necrosis factor receptor superfamily, member 11b (osteoprotegerin)	0.00226
Adamtsl5	ADAMTS-like 5	0.00227
Rps9	ribosomal protein S9	0.00227
Fam3b	family with sequence similarity 3, member B	0.00228
Paqr7	progestin and adipoQ receptor family member VII	0.00228
Pycr1	pyrroline-5-carboxylate reductase 1	0.00228
St14	suppression of tumorigenicity 14 (colon carcinoma)	0.00228
Ccdc9	coiled-coil domain containing 9	0.00229
Ttbk2	tau tubulin kinase 2	0.00229
Dmkn	dermokine	0.0023
Rb1	retinoblastoma 1	0.0023
Mep1a	meprin 1 alpha	0.00231
Rp1l1	retinitis pigmentosa 1 homolog (human)-like 1	0.00231
Slc34a3	solute carrier family 34 (sodium phosphate), member 3	0.00231
Ubqln3	ubiquilin 3	0.00231
Zmat1	zinc finger, matrin type 1	0.00232
Pth	parathyroid hormone	0.00232
Prap1	proline-rich acidic protein 1	0.00232
Gpr4	G protein-coupled receptor 4	0.00232
Smcr7l	Smith-Magenis syndrome chromosome region, candidate 7-like (human)	0.00233
Fam76b	family with sequence similarity 76, member B	0.00234
Atp6v0a4	ATPase, H+ transporting, lysosomal V0 subunit A4	0.00234
Tcn2	transcobalamin 2	0.00235
Rims1	regulating synaptic membrane exocytosis 1	0.00235
Gdpd4	glycerophosphodiester phosphodiesterase domain containing 4	0.00235
Bcl2l13	BCL2-like 13 (apoptosis facilitator)	0.00235
Ypel4	yippee-like 4 (Drosophila)	0.00236
Smarca4	SWI/SNF related, matrix associated, actin dependent regulator of chromatin, subfamily a, member 4	0.00236
Sipa1l1	signal-induced proliferation-associated 1 like 1	0.00236
Oxtr	oxytocin receptor	0.00236
En1	engrailed 1	0.00236
Ehd1	EH-domain containing 1	0.00236
Anks4b	ankyrin repeat and sterile alpha motif domain containing 4B	0.00236
Rassf5	Ras association (RalGDS/AF-6) domain family member 5	0.00237
Myl4	myosin, light polypeptide 4	0.00238
Mmrn2	multimerin 2	0.00238
Efna1	ephrin A1	0.00238
Arhgap11a	Rho GTPase activating protein 11A	0.00238
Cd82	CD82 antigen	0.00239
Maml3	mastermind like 3 (Drosophila)	0.0024
Ptf1a	pancreas specific transcription factor, 1a	0.0024
Ptk7	PTK7 protein tyrosine kinase 7	0.0024
Fibcd1	fibrinogen C domain containing 1	0.00241
Itga2b	integrin alpha 2b	0.00241
Pycr2	pyrroline-5-carboxylate reductase family, member 2	0.00241
Avil	advillin	0.00242
Ddx25	DEAD (Asp-Glu-Ala-Asp) box polypeptide 25	0.00242
Pknox2	Pbx/knotted 1 homeobox 2	0.00242
Plau	plasminogen activator, urokinase	0.00242
Myh2	---	0.00243
Dap	death-associated protein	0.00244
Col1a1	collagen, type I, alpha 1	0.00246
Rasgrp4	RAS guanyl releasing protein 4	0.00246
Tor2a	torsin family 2, member A	0.00246
Wdr22	WD repeat domain 22	0.00246
Capn10	calpain 10	0.00247
Lce1d	late cornified envelope 1D	0.00247
Mtmr11	myotubularin related protein 11	0.00247
Rapgef1	Rap guanine nucleotide exchange factor (GEF) 1	0.00248
Smcr8	Smith-Magenis syndrome chromosome region, candidate 8 homolog (human)	0.00249
Atp11b	ATPase, class VI, type 11B	0.00249
Lrp6	low density lipoprotein receptor-related protein 6	0.0025
Kcnc4	potassium voltage gated channel, Shaw-related subfamily, member 4	0.0025
Cend1	cell cycle exit and neuronal differentiation 1	0.0025
Ckap2l	cytoskeleton associated protein 2-like	0.00251
Casq1	calsequestrin 1	0.00252
Clpb	ClpB caseinolytic peptidase B homolog (E. coli)	0.00254
Btbd12	BTB (POZ) domain containing 12	0.00254
Plod3	procollagen-lysine, 2-oxoglutarate 5-dioxygenase 3	0.00255
Orc6l	origin recognition complex, subunit 6-like (S. cerevisiae)	0.00255
Nt5m	5',3'-nucleotidase, mitochondrial	0.00255
Ormdl3	ORM1-like 3 (S. cerevisiae)	0.00256
Ccl4	chemokine (C-C motif) ligand 4	0.00257
Mylk	myosin, light polypeptide kinase	0.00258
Pdxk	pyridoxal (pyridoxine, vitamin B6) kinase	0.00258
Wdr32	WD repeat domain 32	0.00258
Mcm3ap	minichromosome maintenance deficient 3 (S. cerevisiae) associated protein	0.00259
Zfpm2	zinc finger protein, multitype 2	0.00259
Atxn7l2	ataxin 7-like 2	0.0026
Fuk	fucokinase	0.0026
Crhr1	corticotropin releasing hormone receptor 1	0.00261
Ly6g5c	lymphocyte antigen 6 complex, locus G5C	0.00262
Kctd13	potassium channel tetramerisation domain containing 13	0.00263
Sftpa1	surfactant associated protein A1	0.00263
Slc1a7	solute carrier family 1 (glutamate transporter), member 7	0.00263
Tbx1	T-box 1	0.00263
Snx19	sorting nexin 19	0.00264
Inpp5d	inositol polyphosphate-5-phosphatase D	0.00265
Raver2	ribonucleoprotein, PTB-binding 2	0.00266
Fbxo22	F-box protein 22	0.00267
Plk1	polo-like kinase 1 (Drosophila)	0.00269
Ldhd	lactate dehydrogenase D	0.00269
Kcnk3	potassium channel, subfamily K, member 3	0.00269
Asah2	N-acylsphingosine amidohydrolase 2	0.00269
Rogdi	rogdi homolog (Drosophila)	0.00271
Ripk4	receptor-interacting serine-threonine kinase 4	0.00271
Pcsk4	proprotein convertase subtilisin/kexin type 4	0.00271
Gpr172b	G protein-coupled receptor 172B	0.00272
Fpr1	formyl peptide receptor 1	0.00272
Csf1r	colony stimulating factor 1 receptor	0.00272
Cox6a1	cytochrome c oxidase, subunit VI a, polypeptide 1	0.00273
Fgf16	fibroblast growth factor 16	0.00273
Rpusd2	RNA pseudouridylate synthase domain containing 2	0.00273
Hdac9	histone deacetylase 9	0.00274
Prnd	prion protein dublet	0.00274
Sorbs2	sorbin and SH3 domain containing 2	0.00274
Ppp2r2c	protein phosphatase 2 (formerly 2A), regulatory subunit B (PR 52), gamma isoform	0.00276
Fads3	fatty acid desaturase 3	0.00277
Chst8	carbohydrate (N-acetylgalactosamine 4-0) sulfotransferase 8	0.00278
Hydin	hydrocephalus inducing	0.00279
Zp3	zona pellucida glycoprotein 3	0.00279
Tnnt3	troponin T3, skeletal, fast	0.0028
Mc2r	melanocortin 2 receptor	0.00281
Chrng	cholinergic receptor, nicotinic, gamma polypeptide	0.00282
Sfxn5	sideroflexin 5	0.00283
Ggt1	gamma-glutamyltransferase 1	0.00283
Tat	tyrosine aminotransferase	0.00285
Rgs11	regulator of G-protein signaling 11	0.00285
Trim41	tripartite motif-containing 41	0.00286
Slc16a2	solute carrier family 16 (monocarboxylic acid transporters), member 2	0.00286
Ppl	periplakin	0.00288
Grlf1	glucocorticoid receptor DNA binding factor 1	0.00289
Cyp2e1	cytochrome P450, family 2, subfamily e, polypeptide 1	0.00289
Myocd	myocardin	0.0029
Phf16	PHD finger protein 16	0.0029
Cd36	CD36 antigen	0.00292
Fhit	fragile histidine triad gene	0.00292
Slc17a3	solute carrier family 17 (sodium phosphate), member 3	0.00293
Chrdl1	chordin-like 1	0.00294
Lrrk1	leucine-rich repeat kinase 1	0.00294
Scel	sciellin	0.00294
Zbp1	Z-DNA binding protein 1	0.00294
Gjb2	gap junction protein, beta 2	0.00295
Mtpn	myotrophin	0.00295
Sash1	SAM and SH3 domain containing 1	0.00295
Gnb2	guanine nucleotide binding protein (G protein), beta 2	0.00296
Icmt	isoprenylcysteine carboxyl methyltransferase	0.00296
Ppapdc3	phosphatidic acid phosphatase type 2 domain containing 3	0.00296
Sh3bgrl2	SH3 domain binding glutamic acid-rich protein like 2	0.00296
Slc22a3	solute carrier family 22 (organic cation transporter), member 3	0.00296
Btrc	beta-transducin repeat containing protein	0.00297
Rcor2	REST corepressor 2	0.00297
Tigd5	tigger transposable element derived 5	0.00297
Galr2	galanin receptor 2	0.00298
Actr1a	ARP1 actin-related protein 1 homolog A, centractin alpha (yeast)	0.00298
Cyld	cylindromatosis (turban tumor syndrome)	0.003
Trpc4	transient receptor potential cation channel, subfamily C, member 4	0.00301
Trpv3	transient receptor potential cation channel, subfamily V, member 3	0.00302
Lypd3	Ly6/Plaur domain containing 3	0.00302
Arhgef3	Rho guanine nucleotide exchange factor (GEF) 3	0.00302
Cd276	CD276 antigen	0.00303
Clcn6	chloride channel 6	0.00307
Fam107a	family with sequence similarity 107, member A	0.00307
Gabrg2	gamma-aminobutyric acid (GABA) A receptor, subunit gamma 2	0.00307
Atg3	autophagy-related 3 (yeast)	0.00308
Abcd1	ATP-binding cassette, sub-family D (ALD), member 1	0.00309
Scrib	scribbled homolog (Drosophila)	0.00309
B3gnt7	UDP-GlcNAc:betaGal beta-1,3-N-acetylglucosaminyltransferase 7	0.0031
Ccnf	cyclin F	0.0031
Clec1a	C-type lectin domain family 1, member a	0.00311
Ccr1	chemokine (C-C motif) receptor 1	0.00312
Nxf2	nuclear RNA export factor 2	0.00312
Fam120c	family with sequence similarity 120, member C	0.00313
Lrrtm3	leucine rich repeat transmembrane neuronal 3	0.00313
Tectb	tectorin beta	0.00313
Irx6	Iroquois related homeobox 6 (Drosophila)	0.00314
Plb1	phospholipase B1	0.00314
Cd177	CD177 antigen	0.00315
Trim10	tripartite motif-containing 10	0.00316
Prrt1	proline-rich transmembrane protein 1	0.00316
Mgat1	mannoside acetylglucosaminyltransferase 1	0.00316
Tram2	translocating chain-associating membrane protein 2	0.00317
Tmem150	transmembrane protein 150	0.00317
Add1	adducin 1 (alpha)	0.00318
Spesp1	sperm equatorial segment protein 1	0.0032
Alpl	alkaline phosphatase, liver/bone/kidney	0.0032
Sohlh2	spermatogenesis and oogenesis specific basic helix-loop-helix 2	0.00321
Cttn	cortactin	0.00321
Atp1b2	ATPase, Na+/K+ transporting, beta 2 polypeptide	0.00321
Amigo1	adhesion molecule with Ig like domain 1	0.00321
Palm2	paralemmin 2	0.00322
Csf3	colony stimulating factor 3 (granulocyte)	0.00322
Cmklr1	chemokine-like receptor 1	0.00322
Sbk1	SH3-binding kinase 1	0.00324
Lrrc20	leucine rich repeat containing 20	0.00326
Flrt1	fibronectin leucine rich transmembrane protein 1	0.0033
Oxt	oxytocin	0.0033
Raver1	ribonucleoprotein, PTB-binding 1	0.00331
Klhdc4	kelch domain containing 4	0.00332
Kcnh3	potassium voltage-gated channel, subfamily H (eag-related), member 3	0.00334
A4galt	alpha 1,4-galactosyltransferase	0.00334
Pask	PAS domain containing serine/threonine kinase	0.00336
Kif1a	kinesin family member 1A	0.00336
Rfng	RFNG O-fucosylpeptide 3-beta-N-acetylglucosaminyltransferase	0.00338
Neil2	nei like 2 (E. coli)	0.00341
Adrbk2	adrenergic receptor kinase, beta 2	0.00342
Phldb2	pleckstrin homology-like domain, family B, member 2	0.00343
Runx2	runt related transcription factor 2	0.00344
Syngr4	synaptogyrin 4	0.00344
Dedd2	death effector domain-containing DNA binding protein 2	0.00345
Clybl	citrate lyase beta like	0.00346
Slc35a3	solute carrier family 35 (UDP-N-acetylglucosamine (UDP-GlcNAc) transporter), member 3	0.00347
Plekhf1	pleckstrin homology domain containing, family F (with FYVE domain) member 1	0.00348
Unc13d	unc-13 homolog D (C. elegans)	0.00349
Jmy	junction-mediating and regulatory protein	0.00349
Rras	Harvey rat sarcoma oncogene, subgroup R	0.00351
Rbm38	RNA binding motif protein 38	0.00352
Supt6h	suppressor of Ty 6 homolog (S. cerevisiae)	0.00353
Oma1	OMA1 homolog, zinc metallopeptidase (S. cerevisiae)	0.00354
Fkbp4	FK506 binding protein 4	0.00355
Adm	adrenomedullin	0.00356
Kcnh2	potassium voltage-gated channel, subfamily H (eag-related), member 2	0.00356
Ccbe1	collagen and calcium binding EGF domains 1	0.00357
Cacna1a	calcium channel, voltage-dependent, P/Q type, alpha 1A subunit	0.00358
Cacng4	calcium channel, voltage-dependent, gamma subunit 4	0.00358
Mx2	myxovirus (influenza virus) resistance 2	0.00358
Sesn2	sestrin 2	0.00358
Ubr1	ubiquitin protein ligase E3 component n-recognin 1	0.00359
Grb7	growth factor receptor bound protein 7	0.0036
Fut10	fucosyltransferase 10	0.00361
Odz3	odd Oz/ten-m homolog 3 (Drosophila)	0.00363
Prkd3	protein kinase D3	0.00363
Ccl8	chemokine (C-C motif) ligand 8	0.00365
Aebp2	AE binding protein 2	0.00366
Tmem56	transmembrane protein 56	0.00367
Robo2	roundabout homolog 2 (Drosophila)	0.00368
Rbm25	RNA binding motif protein 25	0.00369
Padi3	peptidyl arginine deiminase, type III	0.0037
Ovgp1	oviductal glycoprotein 1	0.0037
Eps8l2	EPS8-like 2	0.0037
Chek1	checkpoint kinase 1 homolog (S. pombe)	0.00371
Prss3	protease, serine, 3	0.00372
Dmbt1	deleted in malignant brain tumors 1	0.00373
Mfi2	antigen p97 (melanoma associated) identified by monoclonal antibodies 133.2 and 96.5	0.00374
Prelp	proline arginine-rich end leucine-rich repeat	0.00374
Asb10	ankyrin repeat and SOCS box-containing 10	0.00375
Agtpbp1	ATP/GTP binding protein 1	0.00377
Bcan	brevican	0.00377
Ctse	cathepsin E	0.00378
Sema6c	sema domain, transmembrane domain (TM), and cytoplasmic domain, (semaphorin) 6C	0.00378
Cldn7	claudin 7	0.00379
Htra1	HtrA serine peptidase 1	0.00379
Plxnc1	plexin C1	0.00379
Shbg	sex hormone binding globulin	0.00379
Slc27a1	solute carrier family 27 (fatty acid transporter), member 1	0.00379
Pnma2	paraneoplastic antigen MA2	0.00381
Dcbld2	discoidin, CUB and LCCL domain containing 2	0.00381
Dtnbp1	dystrobrevin binding protein 1	0.00382
Tmcc3	transmembrane and coiled coil domains 3	0.00383
Spo11	sporulation protein, meiosis-specific, SPO11 homolog (S. cerevisiae)	0.00383
Pglyrp1	peptidoglycan recognition protein 1	0.00383
Ntan1	N-terminal Asn amidase	0.00385
Cntn6	contactin 6	0.00385
Baz2b	bromodomain adjacent to zinc finger domain, 2B	0.00386
Lims2	LIM and senescent cell antigen like domains 2	0.00388
Ftsj1	FtsJ homolog 1 (E. coli)	0.00388
Card14	caspase recruitment domain family, member 14	0.00388
Atp2b2	ATPase, Ca++ transporting, plasma membrane 2	0.00389
Mxra7	matrix-remodelling associated 7	0.00391
Tbx10	T-box 10	0.00392
Ccnt1	cyclin T1	0.00393
Cln8	ceroid-lipofuscinosis, neuronal 8	0.00394
Mon1a	MON1 homolog A (yeast)	0.00394
Slc44a2	solute carrier family 44, member 2	0.00394
Slc5a9	solute carrier family 5 (sodium/glucose cotransporter), member 9	0.00395
Rgs4	regulator of G-protein signaling 4	0.00395
Mypn	myopalladin	0.00395
Dusp23	dual specificity phosphatase 23	0.00396
Kcns2	K+ voltage-gated channel, subfamily S, 2	0.00396
Pip5kl1	phosphatidylinositol-4-phosphate 5-kinase-like 1	0.00396
Fzr1	fizzy/cell division cycle 20 related 1 (Drosophila)	0.00397
Krt20	keratin 20	0.00398
Kcnn1	potassium intermediate/small conductance calcium-activated channel, subfamily N, member 1	0.00398
Clps	colipase, pancreatic	0.00399
Exosc7	exosome component 7	0.00399
Slc5a2	solute carrier family 5 (sodium/glucose cotransporter), member 2	0.00399
Usp45	ubiquitin specific petidase 45	0.004
Sez6l	seizure related 6 homolog like	0.004
Max	Max protein	0.00401
Hr	hairless	0.00403
Lect2	leukocyte cell-derived chemotaxin 2	0.00404
Nudt8	nudix (nucleoside diphosphate linked moiety X)-type motif 8	0.00405
Ppp2r1a	protein phosphatase 2 (formerly 2A), regulatory subunit A (PR 65), alpha isoform	0.00406
Nrg1	neuregulin 1	0.00406
Capg	capping protein (actin filament), gelsolin-like	0.00407
Tmem162	transmembrane protein 162	0.00407
Pxn	paxillin	0.00408
Hcfc1	host cell factor C1	0.00409
Hip1	huntingtin interacting protein 1	0.00409
Krt15	keratin 15	0.00409
Rasa2	RAS p21 protein activator 2	0.00409
Robo3	roundabout homolog 3 (Drosophila)	0.00409
Trim46	tripartite motif-containing 46	0.00409
Rbm14	RNA binding motif protein 14	0.0041
Lin7b	lin-7 homolog B (C. elegans)	0.0041
Bgn	biglycan	0.00411
Egfl8	EGF-like domain 8	0.00411
Fblim1	filamin binding LIM protein 1	0.00411
Fgfr1	fibroblast growth factor receptor 1	0.00411
Fpgs	folylpolyglutamyl synthetase	0.00413
Cables1	CDK5 and Abl enzyme substrate 1	0.00414
Dom3z	DOM-3 homolog Z (C. elegans)	0.00414
Sstr3	somatostatin receptor 3	0.00415
Socs1	suppressor of cytokine signaling 1	0.00415
Foxi1	forkhead box I1	0.00415
Hsf4	heat shock transcription factor 4	0.00416
Ppara	peroxisome proliferator activated receptor alpha	0.0042
Sh3pxd2b	SH3 and PX domains 2B	0.00423
Ptgfrn	prostaglandin F2 receptor negative regulator	0.00423
Bcl9l	B-cell CLL/lymphoma 9-like	0.00423
Pcgf3	polycomb group ring finger 3	0.00425
Sin3b	transcriptional regulator, SIN3B (yeast)	0.00426
Msn	moesin	0.0043
Rhbdl3	rhomboid, veinlet-like 3 (Drosophila)	0.00432
Gpx5	glutathione peroxidase 5	0.00433
Pmfbp1	polyamine modulated factor 1 binding protein 1	0.00434
Krt19	keratin 19	0.00434
Cdc7	cell division cycle 7 (S. cerevisiae)	0.00435
Dnajb2	DnaJ (Hsp40) homolog, subfamily B, member 2	0.00435
Gpr142	G protein-coupled receptor 142	0.00435
Ribc1	RIB43A domain with coiled-coils 1	0.00438
Inadl	InaD-like (Drosophila)	0.00438
Krt31	keratin 31	0.0044
Eya3	eyes absent 3 homolog (Drosophila)	0.0044
C8g	complement component 8, gamma polypeptide	0.0044
Pctk2	PCTAIRE-motif protein kinase 2	0.00441
Ctf1	cardiotrophin 1	0.00443
Guca2a	guanylate cyclase activator 2a (guanylin)	0.00448
Slc34a2	solute carrier family 34 (sodium phosphate), member 2	0.0045
Zic4	zinc finger protein of the cerebellum 4	0.00451
Tacr1	tachykinin receptor 1	0.00451
Arx	aristaless related homeobox	0.00451
Mapkapk2	MAP kinase-activated protein kinase 2	0.00454
Traip	TRAF-interacting protein	0.00454
Siglec1	sialic acid binding Ig-like lectin 1, sialoadhesin	0.00455
Lrrn3	leucine rich repeat protein 3, neuronal	0.00456
Trem2	triggering receptor expressed on myeloid cells 2	0.00456
Tmem54	transmembrane protein 54	0.00457
Pcdh17	protocadherin 17	0.00457
Ankrd13d	ankyrin repeat domain 13 family, member D	0.00457
Usp29	ubiquitin specific peptidase 29	0.00458
Rdbp	RD RNA-binding protein	0.00459
Ciz1	CDKN1A interacting zinc finger protein 1	0.00459
Dqx1	DEAQ RNA-dependent ATPase	0.0046
Fcrl1	Fc receptor-like 1	0.0046
Msx1	homeobox, msh-like 1	0.0046
Srf	serum response factor	0.0046
Mesp1	mesoderm posterior 1	0.00462
Sox15	SRY-box containing gene 15	0.00462
Capn5	calpain 5	0.00463
Col11a2	collagen, type XI, alpha 2	0.00463
Ncf1	neutrophil cytosolic factor 1	0.00463
Wdr25	WD repeat domain 25	0.00464
Tead3	TEA domain family member 3	0.00465
Mtmr1	myotubularin related protein 1	0.00466
Papln	papilin, proteoglycan-like sulfated glycoprotein	0.00468
B3gnt3	UDP-GlcNAc:betaGal beta-1,3-N-acetylglucosaminyltransferase 3	0.00468
Crispld1	cysteine-rich secretory protein LCCL domain containing 1	0.00469
Ticam1	toll-like receptor adaptor molecule 1	0.00472
Agpat4	1-acylglycerol-3-phosphate O-acyltransferase 4 (lysophosphatidic acid acyltransferase, delta)	0.00472
Dda1	DET1 and DDB1 associated 1	0.00473
Htr4	5 hydroxytryptamine (serotonin) receptor 4	0.00473
Gpr50	G-protein-coupled receptor 50	0.00474
Dlgap4	discs, large homolog-associated protein 4 (Drosophila)	0.00474
Zdhhc21	zinc finger, DHHC domain containing 21	0.00476
Mett5d1	methyltransferase 5 domain containing 1	0.00476
Ddx27	DEAD (Asp-Glu-Ala-Asp) box polypeptide 27	0.00476
F7	coagulation factor VII	0.00479
Slc10a1	solute carrier family 10 (sodium/bile acid cotransporter family), member 1	0.00479
Hap1	huntingtin-associated protein 1	0.0048
Ruvbl2	RuvB-like protein 2	0.00481
Zfand2b	zinc finger, AN1 type domain 2B	0.00482
Slc37a1	solute carrier family 37 (glycerol-3-phosphate transporter), member 1	0.00483
Sema6a	sema domain, transmembrane domain (TM), and cytoplasmic domain, (semaphorin) 6A	0.00483
Pank2	pantothenate kinase 2 (Hallervorden-Spatz syndrome)	0.00483
Edem1	ER degradation enhancer, mannosidase alpha-like 1	0.00484
Sfxn3	sideroflexin 3	0.00484
Rab3b	RAB3B, member RAS oncogene family	0.00485
Ppp1r14a	protein phosphatase 1, regulatory (inhibitor) subunit 14A	0.00485
Dyrk1a	dual-specificity tyrosine-(Y)-phosphorylation regulated kinase 1a	0.00485
Doc2a	double C2, alpha	0.00485
Bcmo1	beta-carotene 15,15'-monooxygenase	0.00485
Evx1	even skipped homeotic gene 1 homolog	0.00486
Rttn	rotatin	0.00486
Kiss1	---	0.00487
Gng13	guanine nucleotide binding protein (G protein), gamma 13	0.00487
Dopey1	dopey family member 1	0.00487
Smr3a	submaxillary gland androgen regulated protein 3A	0.00488
Dpm2	dolichol-phosphate (beta-D) mannosyltransferase 2	0.0049
Opcml	opioid binding protein/cell adhesion molecule-like	0.00491
Agrp	agouti related protein	0.00492
Slc16a12	solute carrier family 16 (monocarboxylic acid transporters), member 12	0.00492
Usp4	ubiquitin specific peptidase 4 (proto-oncogene)	0.00493
Ell	elongation factor RNA polymerase II	0.00494
Rnf26	ring finger protein 26	0.00494
Reg4	regenerating islet-derived family, member 4	0.00495
Fgr	Gardner-Rasheed feline sarcoma viral (Fgr) oncogene homolog	0.00495
Edn2	endothelin 2	0.00495
Axin1	axin 1	0.00495
Atad3a	ATPase family, AAA domain containing 3A	0.00497
Hey2	hairy/enhancer-of-split related with YRPW motif 2	0.00498
Btnl9	butyrophilin-like 9	0.00498
Dbh	dopamine beta hydroxylase	0.00501
Klc3	kinesin light chain 3	0.00501
Mutyh	mutY homolog (E. coli)	0.00502
Rhof	ras homolog gene family, member f	0.00503
Bin3	bridging integrator 3	0.00504
Sgol1	shugoshin-like 1 (S. pombe)	0.00505
Cryga	crystallin, gamma A	0.00506
Trim26	tripartite motif-containing 26	0.00508
Pcsk1n	proprotein convertase subtilisin/kexin type 1 inhibitor	0.00508
Kcna7	potassium voltage-gated channel, shaker-related subfamily, member 7	0.00509
Pnliprp1	pancreatic lipase related protein 1	0.00509
Ppfia3	protein tyrosine phosphatase, receptor type, f polypeptide (PTPRF), interacting protein (liprin), alpha 3	0.0051
Nrap	nebulin-related anchoring protein	0.0051
Hs1bp3	HCLS1 binding protein 3	0.0051
Gdf2	growth differentiation factor 2	0.00511
Mpp3	membrane protein, palmitoylated 3 (MAGUK p55 subfamily member 3)	0.00512
Nedd8	neural precursor cell expressed, developmentally down-regulated gene 8	0.00513
Epha8	Eph receptor A8	0.00513
Drd4	dopamine receptor 4	0.00514
H2afx	H2A histone family, member X	0.00514
Slc2a5	solute carrier family 2 (facilitated glucose transporter), member 5	0.00514
Ttyh2	tweety homolog 2 (Drosophila)	0.00516
P2ry4	pyrimidinergic receptor P2Y, G-protein coupled, 4	0.00517
Golt1a	golgi transport 1 homolog A (S. cerevisiae)	0.00517
Ctbp1	C-terminal binding protein 1	0.00517
Krr1	KRR1, small subunit (SSU) processome component, homolog (yeast)	0.00518
Tas1r1	taste receptor, type 1, member 1	0.00519
Ebf2	early B-cell factor 2	0.00519
Dlg4	discs, large homolog 4 (Drosophila)	0.00519
Dusp18	dual specificity phosphatase 18	0.0052
Il13ra1	interleukin 13 receptor, alpha 1	0.00523
Fam116b	family with sequence similarity 116, member B	0.00524
Nrp2	neuropilin 2	0.00524
Slc8a2	solute carrier family 8 (sodium/calcium exchanger), member 2	0.00525
Psen1	presenilin 1	0.00525
Dok3	docking protein 3	0.00526
Ncbp2	nuclear cap binding protein subunit 2	0.00526
Slc23a3	solute carrier family 23 (nucleobase transporters), member 3	0.00526
Upk2	uroplakin 2	0.00526
Dhdds	dehydrodolichyl diphosphate synthase	0.00527
Cotl1	coactosin-like 1 (Dictyostelium)	0.00531
Ube2o	ubiquitin-conjugating enzyme E2O	0.00532
Pla2g6	phospholipase A2, group VI	0.00532
Clec11a	C-type lectin domain family 11, member a	0.00532
Aox1	aldehyde oxidase 1	0.00532
Numbl	numb-like	0.00533
Lrtm2	leucine-rich repeats and transmembrane domains 2	0.00535
Rai1	retinoic acid induced 1	0.00537
Zmym6	zinc finger, MYM-type 6	0.00538
Tk1	thymidine kinase 1	0.00538
Atn1	atrophin 1	0.00539
Ggt6	gamma-glutamyltransferase 6	0.00539
Hils1	histone H1-like protein in spermatids 1	0.00539
Rfpl3s	RFPL3 antisense RNA (non-protein coding)	0.00542
Cyp46a1	cytochrome P450, family 46, subfamily a, polypeptide 1	0.00542
Crb1	crumbs homolog 1 (Drosophila)	0.00543
Gatad2b	GATA zinc finger domain containing 2B	0.00543
Hdac8	histone deacetylase 8	0.00544
Dusp15	dual specificity phosphatase-like 15	0.00544
Eln	elastin	0.00545
Acot11	acyl-CoA thioesterase 11	0.00546
P2ry13	purinergic receptor P2Y, G-protein coupled 13	0.00546
Mia2	melanoma inhibitory activity 2	0.00547
Pak4	p21 (CDKN1A)-activated kinase 4	0.00549
Cenpj	centromere protein J	0.0055
Ush2a	Usher syndrome 2A (autosomal recessive, mild) homolog (human)	0.0055
Itsn2	intersectin 2	0.00551
Baiap2l2	BAI1-associated protein 2-like 2	0.00552
Cd99l2	CD99 antigen-like 2	0.00552
Cradd	CASP2 and RIPK1 domain containing adaptor with death domain	0.00552
Sln	sarcolipin	0.00553
Igfbp5	insulin-like growth factor binding protein 5	0.00554
S100a6	S100 calcium binding protein A6 (calcyclin)	0.00557
Epdr1	ependymin related protein 1 (zebrafish)	0.00557
Klhdc6	kelch domain containing 6	0.00558
Slc38a3	solute carrier family 38, member 3	0.00561
Ccr4	chemokine (C-C motif) receptor 4	0.00562
Cox7b2	cytochrome c oxidase subunit VIIb2	0.00562
Mxd3	Max dimerization protein 3	0.00564
Hoxd11	homeo box D11	0.00564
Klkb1	kallikrein B, plasma 1	0.00565
Retnlb	resistin like beta	0.00566
Golga1	golgi autoantigen, golgin subfamily a, 1	0.00566
Fem1c	fem-1 homolog c (C.elegans)	0.00566
Apcs	serum amyloid P-component	0.00567
Arhgap24	Rho GTPase activating protein 24	0.00567
Tspyl3	TSPY-like 3	0.00568
Gad1	glutamic acid decarboxylase 1	0.00568
Gfra3	glial cell line derived neurotrophic factor family receptor alpha 3	0.0057
Angptl4	angiopoietin-like 4	0.0057
Mmp24	matrix metallopeptidase 24	0.00572
Atp6v1c2	ATPase, H+ transporting, lysosomal V1 subunit C2	0.00572
Vps53	vacuolar protein sorting 53 (yeast)	0.00573
Scamp4	secretory carrier membrane protein 4	0.00575
Scrt1	scratch homolog 1, zinc finger protein (Drosophila)	0.00575
Sp100	nuclear antigen Sp100	0.00576
Raet1e	retinoic acid early transcript 1E	0.00576
Ndst2	N-deacetylase/N-sulfotransferase (heparan glucosaminyl) 2	0.00577
Ptgdr	prostaglandin D receptor	0.00577
Casp14	caspase 14	0.00578
A2bp1	ataxin 2 binding protein 1	0.00579
Penk	preproenkephalin	0.00581
Hpx	hemopexin	0.00582
Klf11	Kruppel-like factor 11	0.00582
Pitx3	paired-like homeodomain transcription factor 3	0.00582
Rps6ka2	ribosomal protein S6 kinase, polypeptide 2	0.00582
Grk1	G protein-coupled receptor kinase 1	0.00583
Cpb1	carboxypeptidase B1 (tissue)	0.00583
Rab27b	RAB27b, member RAS oncogene family	0.00586
Osbpl5	oxysterol binding protein-like 5	0.00588
Slc14a1	solute carrier family 14 (urea transporter), member 1	0.00588
Ramp3	receptor (calcitonin) activity modifying protein 3	0.00589
Pou4f2	POU domain, class 4, transcription factor 2	0.00589
Ogt	O-linked N-acetylglucosamine (GlcNAc) transferase (UDP-N-acetylglucosamine:polypeptide-N-acetylglucosaminyl transferase)	0.00589
Timm17b	translocase of inner mitochondrial membrane 17b	0.00591
Lamb3	laminin, beta 3	0.00592
Bmp7	bone morphogenetic protein 7	0.00593
Atp6v0a1	ATPase, H+ transporting, lysosomal V0 subunit A1	0.00593
Cd3e	CD3 antigen, epsilon polypeptide	0.00594
Fmo5	flavin containing monooxygenase 5	0.00595
Bet1l	blocked early in transport 1 homolog (S. cerevisiae)-like	0.00595
Sipa1l3	signal-induced proliferation-associated 1 like 3	0.00597
Spinlw1	serine protease inhibitor-like, with Kunitz and WAP domains 1 (eppin)	0.00597
Hgs	HGF-regulated tyrosine kinase substrate	0.00599
Ift172	intraflagellar transport 172 homolog (Chlamydomonas)	0.00602
Bcl2l11	BCL2-like 11 (apoptosis facilitator)	0.00602
Hrc	histidine rich calcium binding protein	0.00603
Tsnaxip1	translin-associated factor X (Tsnax) interacting protein 1	0.00603
Kbtbd4	kelch repeat and BTB (POZ) domain containing 4	0.00604
Alox12b	arachidonate 12-lipoxygenase, 12R type	0.00605
Itih4	inter alpha-trypsin inhibitor, heavy chain 4	0.00605
Tmem92	transmembrane protein 92	0.00605
P4ha2	procollagen-proline, 2-oxoglutarate 4-dioxygenase (proline 4-hydroxylase), alpha II polypeptide	0.00606
Parvg	parvin, gamma	0.00607
Sox11	SRY-box containing gene 11	0.00609
Angpt4	angiopoietin 4	0.00611
Bcor	BCL6 interacting corepressor	0.00613
Barhl1	BarH-like 1 (Drosophila)	0.00613
Tgm4	transglutaminase 4 (prostate)	0.00615
Sv2a	synaptic vesicle glycoprotein 2 a	0.00615
Zcchc5	zinc finger, CCHC domain containing 5	0.00616
Mtrf1l	mitochondrial translational release factor 1-like	0.00619
Igf2	insulin-like growth factor 2	0.0062
Nudt16l1	nudix (nucleoside diphosphate linked moiety X)-type motif 16-like 1	0.0062
Ucp3	uncoupling protein 3 (mitochondrial, proton carrier)	0.0062
Pemt	phosphatidylethanolamine N-methyltransferase	0.00622
Scn8a	sodium channel, voltage-gated, type VIII, alpha	0.00622
Stmn3	stathmin-like 3	0.00623
Mtf1	metal response element binding transcription factor 1	0.00624
Sfrs6	splicing factor, arginine/serine-rich 6	0.00624
Abat	4-aminobutyrate aminotransferase	0.00627
Dnase1l1	deoxyribonuclease 1-like 1	0.00628
Dpep1	dipeptidase 1 (renal)	0.00631
Hsd3b2	hydroxy-delta-5-steroid dehydrogenase, 3 beta- and steroid delta-isomerase 2	0.00631
Vldlr	very low density lipoprotein receptor	0.00631
Pgs1	phosphatidylglycerophosphate synthase 1	0.00632
Tspyl2	TSPY-like 2	0.00633
Elavl3	ELAV (embryonic lethal, abnormal vision, Drosophila)-like 3 (Hu antigen C)	0.00635
Mrgpre	MAS-related GPR, member E	0.00638
Lhx1	LIM homeobox protein 1	0.00638
Slc37a2	solute carrier family 37 (glycerol-3-phosphate transporter), member 2	0.0064
Macf1	microtubule-actin crosslinking factor 1	0.0064
Kcnn2	potassium intermediate/small conductance calcium-activated channel, subfamily N, member 2	0.00641
Ptp4a3	protein tyrosine phosphatase 4a3	0.00642
Mt3	metallothionein 3	0.00642
Htr3b	5-hydroxytryptamine (serotonin) receptor 3B	0.00645
Hmx2	H6 homeo box 2	0.00645
Eif4g3	eukaryotic translation initiation factor 4 gamma, 3	0.00645
Bdh1	3-hydroxybutyrate dehydrogenase, type 1	0.00646
Cd5	CD5 antigen	0.00648
Espn	espin	0.00648
Marcksl1	MARCKS-like 1	0.00648
Mon1b	MON1 homolog b (yeast)	0.00648
Madcam1	mucosal vascular addressin cell adhesion molecule 1	0.0065
Tcte3	t-complex-associated testis expressed 3	0.0065
Tm7sf4	transmembrane 7 superfamily member 4	0.0065
Acin1	apoptotic chromatin condensation inducer 1	0.00652
Pde6g	phosphodiesterase 6G, cGMP-specific, rod, gamma	0.00653
Mcrs1	microspherule protein 1	0.00655
Dcp1a	DCP1 decapping enzyme homolog A (S. cerevisiae)	0.00655
Atp6v1b1	ATPase, H+ transporting, lysosomal V1 subunit B1	0.00656
Rdh12	retinol dehydrogenase 12	0.00656
Pik3cd	phosphatidylinositol 3-kinase catalytic delta polypeptide	0.00657
Cp	ceruloplasmin	0.00657
Acsl6	acyl-CoA synthetase long-chain family member 6	0.00657
Arid1a	AT rich interactive domain 1A (SWI-like)	0.00659
Chrna3	cholinergic receptor, nicotinic, alpha polypeptide 3	0.0066
Hnf4a	hepatic nuclear factor 4, alpha	0.00661
Nr1i2	nuclear receptor subfamily 1, group I, member 2	0.00662
Grik2	glutamate receptor, ionotropic, kainate 2 (beta 2)	0.00662
Nfyc	nuclear transcription factor-Y gamma	0.00664
Slitrk1	SLIT and NTRK-like family, member 1	0.00666
Slc7a5	solute carrier family 7 (cationic amino acid transporter, y+ system), member 5	0.00668
Mcm4	minichromosome maintenance deficient 4 homolog (S. cerevisiae)	0.00668
Kcnma1	potassium large conductance calcium-activated channel, subfamily M, alpha member 1	0.00668
Wdr89	---	0.00671
S100pbp	S100P binding protein	0.00672
Klf17	Kruppel-like factor 17	0.00672
Zc3h8	zinc finger CCCH type containing 8	0.00673
Slc18a3	solute carrier family 18 (vesicular monoamine), member 3	0.00674
Leng8	leukocyte receptor cluster (LRC) member 8	0.00674
P2rx1	purinergic receptor P2X, ligand-gated ion channel, 1	0.00675
Fam83f	family with sequence similarity 83, member F	0.00676
Dtx1	deltex 1 homolog (Drosophila)	0.00676
Phc2	polyhomeotic-like 2 (Drosophila)	0.00679
Lphn1	latrophilin 1	0.00679
Mmp17	matrix metallopeptidase 17	0.0068
Pdgfb	platelet derived growth factor, B polypeptide	0.0068
Tbc1d1	TBC1 domain family, member 1	0.00681
Thbs1	thrombospondin 1	0.00687
Cdh2	cadherin 2	0.00687
Sdcbp2	syndecan binding protein (syntenin) 2	0.00689
Npff	neuropeptide FF-amide peptide precursor	0.0069
Smarcd1	SWI/SNF related, matrix associated, actin dependent regulator of chromatin, subfamily d, member 1	0.0069
Plvap	plasmalemma vesicle associated protein	0.00691
Pdc	phosducin	0.00691
Abtb1	ankyrin repeat and BTB (POZ) domain containing 1	0.00692
Galp	galanin-like peptide	0.00692
Trpv6	transient receptor potential cation channel, subfamily V, member 6	0.00695
Slc35e3	solute carrier family 35, member E3	0.00696
Derl3	Der1-like domain family, member 3	0.00696
Lrrc8c	leucine rich repeat containing 8 family, member C	0.00697
Prss8	protease, serine, 8 (prostasin)	0.007
St3gal1	ST3 beta-galactoside alpha-2,3-sialyltransferase 1	0.00702
Spata18	spermatogenesis associated 18	0.00702
Ace	angiotensin I converting enzyme (peptidyl-dipeptidase A) 1	0.00702
Abcb9	ATP-binding cassette, sub-family B (MDR/TAP), member 9	0.00703
Plec1	plectin 1	0.00706
Ly9	lymphocyte antigen 9	0.00707
Saps1	SAPS domain family, member 1	0.00707
Thbs3	thrombospondin 3	0.00708
Spag9	sperm associated antigen 9	0.00708
Sox30	SRY-box containing gene 30	0.00709
Dpf3	D4, zinc and double PHD fingers, family 3	0.0071
Galntl4	UDP-N-acetyl-alpha-D-galactosamine:polypeptide N-acetylgalactosaminyltransferase-like 4	0.00711
Tubb3	tubulin, beta 3	0.00712
Slco3a1	solute carrier organic anion transporter family, member 3a1	0.00713
Gjb3	gap junction protein, beta 3	0.00713
Pi16	peptidase inhibitor 16	0.00714
Per2	period homolog 2 (Drosophila)	0.00715
Adarb2	adenosine deaminase, RNA-specific, B2	0.00715
Syp	synaptophysin	0.00717
Arhgef12	Rho guanine nucleotide exchange factor (GEF) 12	0.00718
Dtnb	dystrobrevin, beta	0.00718
Acrv1	acrosomal vesicle protein 1	0.0072
Pelp1	proline, glutamic acid and leucine rich protein 1	0.00721
Klhdc8a	kelch domain containing 8A	0.00721
Atf5	activating transcription factor 5	0.00721
Asphd2	aspartate beta-hydroxylase domain containing 2	0.00721
Ugt2a1	UDP glucuronosyltransferase 2 family, polypeptide A1	0.00723
Trim62	tripartite motif-containing 62	0.00724
Lrrc19	leucine rich repeat containing 19	0.00725
Caskin2	CASK-interacting protein 2	0.00725
Nfe2	nuclear factor, erythroid derived 2	0.00728
G6pc2	glucose-6-phosphatase, catalytic, 2	0.00728
C1qtnf5	C1q and tumor necrosis factor related protein 5	0.00728
Magi3	membrane associated guanylate kinase, WW and PDZ domain containing 3	0.00729
Csnk1e	casein kinase 1, epsilon	0.0073
Ece2	endothelin converting enzyme 2	0.00733
Eef1a2	eukaryotic translation elongation factor 1 alpha 2	0.00733
Polk	polymerase (DNA directed), kappa	0.00733
Dlx3	distal-less homeobox 3	0.00735
Sema4f	sema domain, immunoglobulin domain (Ig), TM domain, and short cytoplasmic domain	0.00735
Tnrc6a	trinucleotide repeat containing 6a	0.00736
S100a3	S100 calcium binding protein A3	0.00736
Rtn4rl1	reticulon 4 receptor-like 1	0.00736
Il1rapl2	interleukin 1 receptor accessory protein-like 2	0.00736
Esx1	extraembryonic, spermatogenesis, homeobox 1	0.00736
Megf10	multiple EGF-like-domains 10	0.00737
Mfap2	microfibrillar-associated protein 2	0.00737
Dennd2c	DENN/MADD domain containing 2C	0.00743
Epor	erythropoietin receptor	0.00746
Gpr132	G protein-coupled receptor 132	0.00746
Lrrc15	leucine rich repeat containing 15	0.00746
Astn2	astrotactin 2	0.00748
Dock5	dedicator of cytokinesis 5	0.0075
F11	coagulation factor XI	0.00751
Wnt8b	wingless related MMTV integration site 8b	0.00754
Xdh	xanthine dehydrogenase	0.00757
Aldob	aldolase B, fructose-bisphosphate	0.00757
Efna5	ephrin A5	0.00758
Foxa2	forkhead box A2	0.00758
Hkdc1	hexokinase domain containing 1	0.0076
Insm1	insulinoma-associated 1	0.0076
Mum1	melanoma associated antigen (mutated) 1	0.0076
Ergic1	endoplasmic reticulum-golgi intermediate compartment (ERGIC) 1	0.00763
Rgmb	RGM domain family, member B	0.00763
Smad9	MAD homolog 9 (Drosophila)	0.00764
Scn3b	sodium channel, voltage-gated, type III, beta	0.00769
Sla2	Src-like-adaptor 2	0.00769
Gapdhs	glyceraldehyde-3-phosphate dehydrogenase, spermatogenic	0.0077
Apln	apelin	0.0077
Incenp	inner centromere protein	0.00772
Pde6b	phosphodiesterase 6B, cGMP, rod receptor, beta polypeptide	0.00774
Mpo	myeloperoxidase	0.00777
Ptpn18	protein tyrosine phosphatase, non-receptor type 18	0.00779
Ablim2	actin-binding LIM protein 2	0.0078
Hsd17b1	hydroxysteroid (17-beta) dehydrogenase 1	0.0078
Gria2	glutamate receptor, ionotropic, AMPA2 (alpha 2)	0.00782
Esrra	estrogen related receptor, alpha	0.00782
Serpinf2	serine (or cysteine) peptidase inhibitor, clade F, member 2	0.00783
Gipc1	GIPC PDZ domain containing family, member 1	0.00784
Top3b	topoisomerase (DNA) III beta	0.00784
Lrrtm1	leucine rich repeat transmembrane neuronal 1	0.00785
Serpinb13	serine (or cysteine) peptidase inhibitor, clade B (ovalbumin), member 13	0.00786
Lgi3	leucine-rich repeat LGI family, member 3	0.00786
Bbc3	BCL2 binding component 3	0.00789
Slc22a6	solute carrier family 22 (organic anion transporter), member 6	0.00792
Ube2c	ubiquitin-conjugating enzyme E2C	0.00792
C1ql2	complement component 1, q subcomponent-like 2	0.00793
Ccdc57	coiled-coil domain containing 57	0.00793
Darc	Duffy blood group, chemokine receptor	0.00793
Cog2	component of oligomeric golgi complex 2	0.00796
Aldh1b1	aldehyde dehydrogenase 1 family, member B1	0.00796
Idi2	isopentenyl-diphosphate delta isomerase 2	0.00798
Jak3	Janus kinase 3	0.00801
Fchsd2	FCH and double SH3 domains 2	0.00803
Sufu	suppressor of fused homolog (Drosophila)	0.00804
Slc4a4	solute carrier family 4 (anion exchanger), member 4	0.00804
Ankrd54	ankyrin repeat domain 54	0.00806
Rpp21	ribonuclease P 21 subunit (human)	0.00806
Zgpat	zinc finger, CCCH-type with G patch domain	0.00807
Lrp8	low density lipoprotein receptor-related protein 8, apolipoprotein e receptor	0.00807
Tapbp	TAP binding protein	0.00808
Setd8	SET domain containing (lysine methyltransferase) 8	0.00808
Bnip3	BCL2/adenovirus E1B interacting protein 3	0.00808
Pcdhb4	protocadherin beta 4	0.0081
Shkbp1	Sh3kbp1 binding protein 1	0.00811
Rcbtb1	regulator of chromosome condensation (RCC1) and BTB (POZ) domain containing protein 1	0.00812
Folr1	folate receptor 1 (adult)	0.00812
Tarbp2	TAR (HIV) RNA binding protein 2	0.00813
Mapkbp1	mitogen-activated protein kinase binding protein 1	0.00813
Il10	interleukin 10	0.00813
Gpr157	G protein-coupled receptor 157	0.00814
Il21r	interleukin 21 receptor	0.00815
Nid1	nidogen 1	0.00815
Rassf7	Ras association (RalGDS/AF-6) domain family (N-terminal) member 7	0.00815
Tacr2	tachykinin receptor 2	0.00816
Iqsec2	IQ motif and Sec7 domain 2	0.00816
Pgpep1	pyroglutamyl-peptidase I	0.00817
Ppp1r14d	protein phosphatase 1, regulatory (inhibitor) subunit 14D	0.00822
Hectd3	HECT domain containing 3	0.00823
Fbxl20	F-box and leucine-rich repeat protein 20	0.00826
Sdk2	sidekick homolog 2 (chicken)	0.00826
Dnase2b	deoxyribonuclease II beta	0.00827
Pik3ap1	phosphoinositide-3-kinase adaptor protein 1	0.0083
Klhl11	kelch-like 11 (Drosophila)	0.00832
Tmem144	transmembrane protein 144	0.00835
Asns	asparagine synthetase	0.00838
Npr3	natriuretic peptide receptor 3	0.00839
Syngr1	synaptogyrin 1	0.0084
Il16	interleukin 16	0.00842
Frrs1	ferric-chelate reductase 1	0.00843
Pdha2	pyruvate dehydrogenase E1 alpha 2	0.00843
Pglyrp4	peptidoglycan recognition protein 4	0.00846
Mybpc2	myosin binding protein C, fast-type	0.00847
Ucp1	uncoupling protein 1 (mitochondrial, proton carrier)	0.00848
Zbtb7a	zinc finger and BTB domain containing 7a	0.00848
Thrsp	thyroid hormone responsive SPOT14 homolog (Rattus)	0.00849
Trim17	tripartite motif-containing 17	0.00849
Trim29	tripartite motif-containing 29	0.00849
Pitpnm2	phosphatidylinositol transfer protein, membrane-associated 2	0.00851
Fuz	fuzzy homolog (Drosophila)	0.00852
Luzp1	leucine zipper protein 1	0.00853
Lgals9	lectin, galactose binding, soluble 9	0.00855
Asph	aspartate-beta-hydroxylase	0.00856
Foxl1	forkhead box L1	0.00858
Ccdc67	coiled-coil domain containing 67	0.00858
Phldb1	pleckstrin homology-like domain, family B, member 1	0.00859
Dapk3	death-associated protein kinase 3	0.00859
Ccnb1	cyclin B1	0.00859
Plekhg5	pleckstrin homology domain containing, family G (with RhoGef domain) member 5	0.0086
Tshb	thyroid stimulating hormone, beta subunit	0.00862
Phf15	PHD finger protein 15	0.00863
Dsg4	desmoglein 4	0.00864
Fhad1	forkhead-associated (FHA) phosphopeptide binding domain 1	0.00865
Gpld1	glycosylphosphatidylinositol specific phospholipase D1	0.00865
Fgd2	FYVE, RhoGEF and PH domain containing 2	0.00866
Pla2g2a	phospholipase A2, group IIA (platelets, synovial fluid)	0.00867
Cnr2	cannabinoid receptor 2 (macrophage)	0.00867
Mdm2	transformed mouse 3T3 cell double minute 2	0.00868
Thoc4	THO complex 4	0.00871
Nt5dc3	5'-nucleotidase domain containing 3	0.00872
Pttg1ip	pituitary tumor-transforming 1 interacting protein	0.00875
Arl10	ADP-ribosylation factor-like 10	0.00875
Rufy2	RUN and FYVE domain-containing 2	0.00876
Cdc42se2	CDC42 small effector 2	0.00878
Dgkq	diacylglycerol kinase, theta	0.00878
Chrm3	cholinergic receptor, muscarinic 3, cardiac	0.00882
Parvb	parvin, beta	0.00882
Krt16	keratin 16	0.00883
Hck	hemopoietic cell kinase	0.00884
Slc24a1	solute carrier family 24 (sodium/potassium/calcium exchanger), member 1	0.00885
Il18bp	---	0.00885
Sgta	small glutamine-rich tetratricopeptide repeat (TPR)-containing, alpha	0.00887
Dpm3	dolichyl-phosphate mannosyltransferase polypeptide 3	0.00888
Kcnj15	potassium inwardly-rectifying channel, subfamily J, member 15	0.0089
Myst4	MYST histone acetyltransferase monocytic leukemia 4	0.0089
Col8a2	collagen, type VIII, alpha 2	0.00891
Fmnl3	formin-like 3	0.00891
[truncated: 1,355 more rows]
