# Supplementary material for: Transcriptional evidence for the "Reverse Warburg Effect" in human breast cancer tumor stroma and metastasis: Similarities with oxidative stress, inflammation, Alzheimer's disease, and "Neuron-Glia Metabolic Coupling"
Source: Aging (Albany NY). 2010 Mar 31;2(4):185–99. doi: 10.18632/aging.100134 (PMC2881509; doi:10.18632/aging.100134)
Supplement: Supplementary Table 3 [file aging-02-185-s003.xls]

## Sheet: Suppl Table 3.Metastasis.xls
Gene	Description	p-value
Gcn1l1	GCN1 general control of amino-acid synthesis 1-like 1 (yeast)	7.07e-07
Alkbh2	alkB, alkylation repair homolog 2 (E. coli)	8.42e-07
Dhrs2	dehydrogenase/reductase member 2	4.06e-06
Pycr2	pyrroline-5-carboxylate reductase family, member 2	3.31e-05
Pex14	peroxisomal biogenesis factor 14	5.67e-05
Ptdss2	phosphatidylserine synthase 2	6.99e-05
Tsc2	tuberous sclerosis 2	9.19e-05
Efna1	ephrin A1	9.29e-05
Zfpm1	zinc finger protein, multitype 1	0.000152
Pold3	polymerase (DNA-directed), delta 3, accessory subunit	0.000164
Med28	mediator of RNA polymerase II transcription, subunit 28 homolog (yeast)	0.000193
Mki67ip	Mki67 (FHA domain) interacting nucleolar phosphoprotein	0.000215
Sox1	SRY-box containing gene 1	0.000226
Myb	myeloblastosis oncogene	0.000286
Rpl21	ribosomal protein L21	0.000316
Fbxo41	F-box protein 41	0.00032
Gpr153	G protein-coupled receptor 153	0.000358
Upf1	UPF1 regulator of nonsense transcripts homolog (yeast)	0.00036
Diras1	DIRAS family, GTP-binding RAS-like 1	0.000383
Gdf15	growth differentiation factor 15	0.000394
Snrpe	---	0.00042
Wdr5b	WD repeat domain 5B	0.00043
Vtn	vitronectin	0.000452
Scrib	scribbled homolog (Drosophila)	0.000464
Acss1	acyl-CoA synthetase short-chain family member 1	0.000524
Sox8	SRY-box containing gene 8	0.000528
Ddx54	DEAD (Asp-Glu-Ala-Asp) box polypeptide 54	0.000583
Hgs	HGF-regulated tyrosine kinase substrate	0.000598
Ndufb7	NADH dehydrogenase (ubiquinone) 1 beta subcomplex, 7	0.000603
Bax	BCL2-associated X protein	0.00062
Kiss1r	KISS1 receptor	0.000633
Syne2	synaptic nuclear envelope 2	0.000651
Rfng	RFNG O-fucosylpeptide 3-beta-N-acetylglucosaminyltransferase	0.000661
Rnaseh2a	ribonuclease H2, large subunit	0.000683
Snupn	snurportin 1	0.000692
Ppp1r16a	protein phosphatase 1, regulatory (inhibitor) subunit 16A	0.000767
Spata4	spermatogenesis associated 4	0.00083
Pdcd6ip	programmed cell death 6 interacting protein	0.000835
Ndufa3	NADH dehydrogenase (ubiquinone) 1 alpha subcomplex, 3	0.000855
Trub2	TruB pseudouridine (psi) synthase homolog 2 (E. coli)	0.000856
Hoxb3	homeo box B3	0.000867
Tmem121	transmembrane protein 121	0.000918
Hspb1	---	0.000927
Pld3	phospholipase D family, member 3	0.000975
Trmt1	TRM1 tRNA methyltransferase 1 homolog (S. cerevisiae)	0.000983
Sall2	sal-like 2 (Drosophila)	0.000997
Scarb1	scavenger receptor class B, member 1	0.00103
Cebpa	CCAAT/enhancer binding protein (C/EBP), alpha	0.00106
Hdgf	hepatoma-derived growth factor	0.00109
Bcat2	branched chain aminotransferase 2, mitochondrial	0.0011
Caskin2	CASK-interacting protein 2	0.00112
Igfbp2	insulin-like growth factor binding protein 2	0.00112
Cpsf6	cleavage and polyadenylation specific factor 6	0.00115
Tbcd	tubulin-specific chaperone d	0.00115
Lamb3	laminin, beta 3	0.00118
Itfg3	integrin alpha FG-GAP repeat containing 3	0.00118
Ing5	inhibitor of growth family, member 5	0.00119
Acad10	acyl-Coenzyme A dehydrogenase family, member 10	0.00129
Eno3	enolase 3, beta muscle	0.00129
Jrk	jerky	0.00134
Apod	apolipoprotein D	0.00137
Igsf9	immunoglobulin superfamily, member 9	0.00141
Phf10	PHD finger protein 10	0.00142
Aldh16a1	aldehyde dehydrogenase 16 family, member A1	0.00149
Eif4b	eukaryotic translation initiation factor 4B	0.00152
Las1l	LAS1-like (S. cerevisiae)	0.00167
Zmat2	zinc finger, matrin type 2	0.00169
Aldoa	aldolase A, fructose-bisphosphate	0.00169
Grin2d	glutamate receptor, ionotropic, NMDA2D (epsilon 4)	0.00178
Emp2	epithelial membrane protein 2	0.0018
Fbxo34	F-box protein 34	0.00186
Ccdc104	coiled-coil domain containing 104	0.00186
Cyp4b1	cytochrome P450, family 4, subfamily b, polypeptide 1	0.00189
Deaf1	deformed epidermal autoregulatory factor 1 (Drosophila)	0.00196
Sema6b	sema domain, transmembrane domain (TM), and cytoplasmic domain, (semaphorin) 6B	0.00198
Nkd2	naked cuticle 2 homolog (Drosophila)	0.00202
Klf16	Kruppel-like factor 16	0.00202
Gabrd	gamma-aminobutyric acid (GABA) A receptor, subunit delta	0.00202
Mrpl9	mitochondrial ribosomal protein L9	0.00203
Csnk1e	casein kinase 1, epsilon	0.00204
Cited4	Cbp/p300-interacting transactivator, with Glu/Asp-rich carboxy-terminal domain, 4	0.00204
Cdc42se2	CDC42 small effector 2	0.00204
Hoxa3	homeo box A3	0.00213
Tnnc2	troponin C2, fast	0.00215
Hoxb13	homeo box B13	0.00218
Cst6	cystatin E/M	0.00218
Sfi1	Sfi1 homolog, spindle assembly associated (yeast)	0.00227
Cope	coatomer protein complex, subunit epsilon	0.0023
Phox2a	paired-like homeobox 2a	0.00233
Tff3	trefoil factor 3, intestinal	0.00238
Pcnt	pericentrin (kendrin)	0.00239
Mpst	mercaptopyruvate sulfurtransferase	0.00239
Nr2f1	nuclear receptor subfamily 2, group F, member 1	0.00241
Pnliprp1	pancreatic lipase related protein 1	0.00248
Prodh	proline dehydrogenase	0.0026
Tcf7	transcription factor 7, T-cell specific	0.00263
Trpv1	transient receptor potential cation channel, subfamily V, member 1	0.00265
Lrrc14	leucine rich repeat containing 14	0.0027
Gamt	guanidinoacetate methyltransferase	0.00273
Antxr2	anthrax toxin receptor 2	0.00285
Rps7	ribosomal protein S7	0.00286
Exosc7	exosome component 7	0.00292
Exoc7	exocyst complex component 7	0.00293
Ube2v2	ubiquitin-conjugating enzyme E2 variant 2	0.00294
Lrrc46	leucine rich repeat containing 46	0.00295
Aprt	adenine phosphoribosyl transferase	0.00299
Smad2	MAD homolog 2 (Drosophila)	0.00301
Zc3h6	zinc finger CCCH type containing 6	0.00303
Caskin1	CASK interacting protein 1	0.0031
Zmym6	zinc finger, MYM-type 6	0.0031
Asgr1	asialoglycoprotein receptor 1	0.00313
Abi2	abl-interactor 2	0.00323
Rundc1	RUN domain containing 1	0.00323
Atp5s	ATP synthase, H+ transporting, mitochondrial F0 complex, subunit s	0.00327
Tat	tyrosine aminotransferase	0.00327
Lynx1	Ly6/neurotoxin 1	0.00328
Tnk2	tyrosine kinase, non-receptor, 2	0.00331
Wipi2	WD repeat domain, phosphoinositide interacting 2	0.00332
Egfl7	EGF-like domain 7	0.00332
Mzf1	myeloid zinc finger 1	0.00335
Psors1c2	psoriasis susceptibility 1 candidate 2 (human)	0.00342
Pars2	prolyl-tRNA synthetase (mitochondrial)(putative)	0.00346
Pou1f1	POU domain, class 1, transcription factor 1 (Pit1, growth hormone factor 1)	0.0035
B4galnt1	beta-1,4-N-acetyl-galactosaminyl transferase 1	0.00357
Scrt1	scratch homolog 1, zinc finger protein (Drosophila)	0.0036
Sult2b1	sulfotransferase family, cytosolic, 2B, member 1	0.00361
Gjb1	gap junction protein, beta 1	0.00362
Ranbp1	RAN binding protein 1	0.00364
Sepn1	selenoprotein N, 1	0.00368
Galnt14	UDP-N-acetyl-alpha-D-galactosamine:polypeptide N-acetylgalactosaminyltransferase 14	0.00369
Alms1	Alstrom syndrome 1 homolog (human)	0.0038
Spr	sepiapterin reductase	0.0038
Tbx1	T-box 1	0.00388
Myod1	myogenic differentiation 1	0.00388
Rpl19	---	0.00392
Tbkbp1	TBK1 binding protein 1	0.00394
B4galt2	UDP-Gal:betaGlcNAc beta 1,4- galactosyltransferase, polypeptide 2	0.00396
Cacybp	calcyclin binding protein	0.00397
Mycn	v-myc myelocytomatosis viral related oncogene, neuroblastoma derived (avian)	0.00401
Cdt1	chromatin licensing and DNA replication factor 1	0.00402
Sox3	SRY-box containing gene 3	0.00404
Prr13	proline rich 13	0.00406
Hrh1	histamine receptor H1	0.00407
S100a14	S100 calcium binding protein A14	0.00412
Tubb4	tubulin, beta 4	0.00423
Strc	stereocilin	0.00424
Nudt22	nudix (nucleoside diphosphate linked moiety X)-type motif 22	0.00426
Asgr2	asialoglycoprotein receptor 2	0.00438
Tmie	transmembrane inner ear	0.00448
Clpx	caseinolytic peptidase X (E.coli)	0.0045
Psmd7	proteasome (prosome, macropain) 26S subunit, non-ATPase, 7	0.00454
Psmd4	proteasome (prosome, macropain) 26S subunit, non-ATPase, 4	0.00458
Pabpc1	poly(A) binding protein, cytoplasmic 1	0.00464
Tubb3	tubulin, beta 3	0.00466
Amh	anti-Mullerian hormone	0.00468
Igf2bp1	insulin-like growth factor 2 mRNA binding protein 1	0.0047
Hist1h2aa	histone cluster 1, H2aa	0.00472
Mvk	mevalonate kinase	0.00478
Galr3	galanin receptor 3	0.00478
Pou2f2	POU domain, class 2, transcription factor 2	0.00484
Mc1r	melanocortin 1 receptor	0.00486
Pfn4	profilin family, member 4	0.00489
Angel2	angel homolog 2 (Drosophila)	0.00491
Nfatc3	nuclear factor of activated T-cells, cytoplasmic, calcineurin-dependent 3	0.005
Fdps	farnesyl diphosphate synthetase	0.00503
Top1mt	DNA topoisomerase 1, mitochondrial	0.00505
Stmn2	stathmin-like 2	0.00513
Bhmt2	betaine-homocysteine methyltransferase 2	0.00513
Adrb1	adrenergic receptor, beta 1	0.00516
Klhl22	kelch-like 22 (Drosophila)	0.00519
Bloc1s1	---	0.00536
Vamp2	vesicle-associated membrane protein 2	0.00543
Nfe2	nuclear factor, erythroid derived 2	0.0055
Dynlrb2	dynein light chain roadblock-type 2	0.00551
Epor	erythropoietin receptor	0.00564
Nanog	Nanog homeobox	0.00566
Cdh8	cadherin 8	0.00573
Foxd3	forkhead box D3	0.00573
Krt8	---	0.00575
Slc25a29	solute carrier family 25 (mitochondrial carrier, palmitoylcarnitine transporter), member 29	0.00579
Tomm20	---	0.00581
Cdh4	cadherin 4	0.00588
Nle1	notchless homolog 1 (Drosophila)	0.00589
Ankrd42	ankyrin repeat domain 42	0.00592
Plcg1	phospholipase C, gamma 1	0.00596
Ankrd11	ankyrin repeat domain 11	0.00614
Arid3a	AT rich interactive domain 3A (BRIGHT-like)	0.00616
Npepps	aminopeptidase puromycin sensitive	0.00616
Foxred2	FAD-dependent oxidoreductase domain containing 2	0.00618
Mum1	melanoma associated antigen (mutated) 1	0.00625
Rpap1	RNA polymerase II associated protein 1	0.00635
Dcakd	dephospho-CoA kinase domain containing	0.00638
Camk2b	calcium/calmodulin-dependent protein kinase II, beta	0.00638
Gng4	guanine nucleotide binding protein (G protein), gamma 4	0.00641
Frem1	Fras1 related extracellular matrix protein 1	0.00651
Grpr	gastrin releasing peptide receptor	0.00654
Atic	5-aminoimidazole-4-carboxamide ribonucleotide formyltransferase/IMP cyclohydrolase	0.00656
Lmx1b	LIM homeobox transcription factor 1 beta	0.00656
Wfikkn2	WAP, follistatin/kazal, immunoglobulin, kunitz and netrin domain containing 2	0.00658
En2	engrailed 2	0.00674
Rgl2	ral guanine nucleotide dissociation stimulator-like 2	0.00678
Ppp1r14d	protein phosphatase 1, regulatory (inhibitor) subunit 14D	0.0068
Kctd1	potassium channel tetramerisation domain containing 1	0.00683
Nefl	neurofilament, light polypeptide	0.0069
Nfix	nuclear factor I/X	0.00692
Acyp2	acylphosphatase 2, muscle type	0.00694
Slc14a2	solute carrier family 14 (urea transporter), member 2	0.00698
Hif1an	hypoxia-inducible factor 1, alpha subunit inhibitor	0.00698
Asns	asparagine synthetase	0.00702
Ttc28	tetratricopeptide repeat domain 28	0.00706
Bok	BCL2-related ovarian killer protein	0.0071
Chd7	chromodomain helicase DNA binding protein 7	0.00711
Fkbp2	FK506 binding protein 2	0.00716
Dnajc5b	DnaJ (Hsp40) homolog, subfamily C, member 5 beta	0.00721
Mthfd1l	methylenetetrahydrofolate dehydrogenase (NADP+ dependent) 1-like	0.00724
Hmgn1	---	0.00731
Bckdk	branched chain ketoacid dehydrogenase kinase	0.00735
Spsb2	splA/ryanodine receptor domain and SOCS box containing 2	0.00735
Gstm5	glutathione S-transferase, mu 5	0.00739
Psph	phosphoserine phosphatase	0.00742
Myo1g	myosin IG	0.00742
Ogg1	8-oxoguanine DNA-glycosylase 1	0.00744
Rbm10	RNA binding motif protein 10	0.00749
Dolpp1	dolichyl pyrophosphate phosphatase 1	0.0075
Galnt10	UDP-N-acetyl-alpha-D-galactosamine:polypeptide N-acetylgalactosaminyltransferase 10	0.0075
Sssca1	Sjogren's syndrome/scleroderma autoantigen 1 homolog (human)	0.00753
Rrs1	RRS1 ribosome biogenesis regulator homolog (S. cerevisiae)	0.00755
Aldh1b1	aldehyde dehydrogenase 1 family, member B1	0.00758
Cox18	---	0.0076
Gpr39	G protein-coupled receptor 39	0.00773
Esr1	estrogen receptor 1 (alpha)	0.00778
Ces2	carboxylesterase 2	0.00779
Syt1	synaptotagmin I	0.00782
Xrcc6	X-ray repair complementing defective repair in Chinese hamster cells 6	0.0079
Dus4l	dihydrouridine synthase 4-like (S. cerevisiae)	0.00792
Dtx2	deltex 2 homolog (Drosophila)	0.00793
Acbd4	acyl-Coenzyme A binding domain containing 4	0.00798
Prkx	protein kinase, X-linked	0.008
Usp13	ubiquitin specific peptidase 13 (isopeptidase T-3)	0.00803
Hic2	hypermethylated in cancer 2	0.00803
Actl6b	actin-like 6B	0.00813
Lin28	lin-28 homolog (C. elegans)	0.00826
Psca	prostate stem cell antigen	0.00828
Pcmtd2	protein-L-isoaspartate (D-aspartate) O-methyltransferase domain containing 2	0.00834
Nkiras1	NFKB inhibitor interacting Ras-like protein 1	0.00837
Celsr3	cadherin, EGF LAG seven-pass G-type receptor 3 (flamingo homolog, Drosophila)	0.0084
Pdzd3	PDZ domain containing 3	0.00843
Cdadc1	cytidine and dCMP deaminase domain containing 1	0.00846
Ltv1	LTV1 homolog (S. cerevisiae)	0.00856
Sftpc	surfactant associated protein C	0.00864
Rabif	RAB interacting factor	0.00865
Grap	GRB2-related adaptor protein	0.00876
Avil	advillin	0.00883
Fam20b	family with sequence similarity 20, member B	0.00889
Cplx1	complexin 1	0.00898
Dctn3	dynactin 3	0.00906
Ccdc108	coiled-coil domain containing 108	0.00906
Rem1	rad and gem related GTP binding protein 1	0.0091
Dedd	death effector domain-containing	0.0092
Cct2	chaperonin containing Tcp1, subunit 2 (beta)	0.00921
Sms	spermine synthase	0.00921
Arid2	AT rich interactive domain 2 (ARID, RFX-like)	0.00923
Med11	mediator of RNA polymerase II transcription, subunit 11 homolog (S. cerevisiae)	0.00928
Ank2	ankyrin 2, brain	0.00938
Cdkn2b	cyclin-dependent kinase inhibitor 2B (p15, inhibits CDK4)	0.00938
Nucks1	nuclear casein kinase and cyclin-dependent kinase substrate 1	0.00943
Cdk3	cyclin-dependent kinase 3	0.00947
Nedd1	neural precursor cell expressed, developmentally down-regulated gene 1	0.00951
Gria3	glutamate receptor, ionotropic, AMPA3 (alpha 3)	0.00959
Tmem35	transmembrane protein 35	0.00961
Cacna2d3	calcium channel, voltage-dependent, alpha2/delta subunit 3	0.00968
Arhgdia	Rho GDP dissociation inhibitor (GDI) alpha	0.00977
Leo1	Leo1, Paf1/RNA polymerase II complex component, homolog (S. cerevisiae)	0.00978
Lfng	LFNG O-fucosylpeptide 3-beta-N-acetylglucosaminyltransferase	0.00981
Obfc1	oligonucleotide/oligosaccharide-binding fold containing 1	0.00985
Pfkl	phosphofructokinase, liver, B-type	0.00985
Fsd1	fibronectin type 3 and SPRY domain-containing protein	0.00995
Pygm	muscle glycogen phosphorylase	0.01
Cdc2l1	cell division cycle 2-like 1	0.0101
Gpa33	glycoprotein A33 (transmembrane)	0.0101
Pdlim4	PDZ and LIM domain 4	0.0101
Pmf1	polyamine-modulated factor 1	0.0101
Gfra4	glial cell line derived neurotrophic factor family receptor alpha 4	0.0102
Trim14	tripartite motif-containing 14	0.0103
Pus1	pseudouridine synthase 1	0.0103
Mettl9	methyltransferase like 9	0.0103
Arl6ip4	ADP-ribosylation factor-like 6 interacting protein 4	0.0103
Tyw3	tRNA-yW synthesizing protein 3 homolog (S. cerevisiae)	0.0104
Tkt	transketolase	0.0105
Ppt1	palmitoyl-protein thioesterase 1	0.0105
Myh6	---	0.0105
Donson	downstream neighbor of SON	0.0105
Coq7	demethyl-Q 7	0.0105
Sez6l2	seizure related 6 homolog like 2	0.0106
Mtch2	mitochondrial carrier homolog 2 (C. elegans)	0.0106
Kif5c	kinesin family member 5C	0.0106
Mapkbp1	mitogen-activated protein kinase binding protein 1	0.0107
Slc11a1	solute carrier family 11 (proton-coupled divalent metal ion transporters), member 1	0.0108
Irak1	interleukin-1 receptor-associated kinase 1	0.0108
Acadvl	acyl-Coenzyme A dehydrogenase, very long chain	0.0109
Ankrd13b	ankyrin repeat domain 13b	0.0109
Maneal	mannosidase, endo-alpha-like	0.0109
Steap3	STEAP family member 3	0.0109
Atxn7l2	ataxin 7-like 2	0.011
Gpd1	glycerol-3-phosphate dehydrogenase 1 (soluble)	0.011
Larp7	La ribonucleoprotein domain family, member 7	0.011
Prr5	proline rich 5 (renal)	0.011
Tacc2	transforming, acidic coiled-coil containing protein 2	0.011
Syn1	synapsin I	0.0111
Melk	maternal embryonic leucine zipper kinase	0.0111
Cdh6	cadherin 6	0.0111
Crybb3	crystallin, beta B3	0.0112
Plec1	plectin 1	0.0112
Sardh	sarcosine dehydrogenase	0.0112
Pcdh7	protocadherin 7	0.0113
Lcorl	ligand dependent nuclear receptor corepressor-like	0.0114
Fcho1	FCH domain only 1	0.0114
Acaca	acetyl-Coenzyme A carboxylase alpha	0.0115
Anks3	ankyrin repeat and sterile alpha motif domain containing 3	0.0115
Tubb2b	tubulin, beta 2B	0.0115
Khsrp	KH-type splicing regulatory protein	0.0116
Speg	SPEG complex locus	0.0116
Tpcn1	two pore channel 1	0.0116
Wif1	Wnt inhibitory factor 1	0.0117
Prss2	protease, serine, 2	0.0117
Hoxc13	homeo box C13	0.0117
Dnajb8	DnaJ (Hsp40) homolog, subfamily B, member 8	0.0117
Acd	adrenocortical dysplasia	0.0117
Cplx2	complexin 2	0.0118
Slc27a2	solute carrier family 27 (fatty acid transporter), member 2	0.0118
Pla2g2d	phospholipase A2, group IID	0.0119
Pcsk1n	proprotein convertase subtilisin/kexin type 1 inhibitor	0.0119
Il17b	interleukin 17B	0.0119
Hils1	histone H1-like protein in spermatids 1	0.0119
Hes7	hairy and enhancer of split 7 (Drosophila)	0.012
Exosc8	exosome component 8	0.012
Sema3f	sema domain, immunoglobulin domain (Ig), short basic domain, secreted, (semaphorin) 3F	0.0121
Ttc1	tetratricopeptide repeat domain 1	0.0121
Pabpc3	poly(A) binding protein, cytoplasmic 3	0.0123
Galns	galactosamine (N-acetyl)-6-sulfate sulfatase	0.0124
Olfm1	olfactomedin 1	0.0124
Pycrl	pyrroline-5-carboxylate reductase-like	0.0124
Taf1c	---	0.0124
Wnt8b	wingless related MMTV integration site 8b	0.0124
Tfpi	tissue factor pathway inhibitor	0.0127
Ruvbl1	RuvB-like protein 1	0.0128
Pigx	phosphatidylinositol glycan anchor biosynthesis, class X	0.0128
Hes5	hairy and enhancer of split 5 (Drosophila)	0.0128
Dtnbp1	dystrobrevin binding protein 1	0.0128
Rab11fip3	RAB11 family interacting protein 3 (class II)	0.0129
Hs1bp3	HCLS1 binding protein 3	0.0129
Hemk1	HemK methyltransferase family member 1	0.0129
Trim10	tripartite motif-containing 10	0.013
Zfp106	zinc finger protein 106	0.013
Rab36	RAB36, member RAS oncogene family	0.0131
Itih2	inter-alpha trypsin inhibitor, heavy chain 2	0.0131
Arhgap27	Rho GTPase activating protein 27	0.0131
Mterfd1	MTERF domain containing 1	0.0132
U2af2	U2 small nuclear ribonucleoprotein auxiliary factor (U2AF) 2	0.0132
Csdc2	cold shock domain containing C2, RNA binding	0.0133
Trnt1	tRNA nucleotidyl transferase, CCA-adding, 1	0.0134
Taf9b	TAF9B RNA polymerase II, TATA box binding protein (TBP)-associated factor	0.0134
Stk11ip	serine/threonine kinase 11 interacting protein	0.0134
Pcsk4	proprotein convertase subtilisin/kexin type 4	0.0134
Hsp90ab1	heat shock protein 90 alpha (cytosolic), class B member 1	0.0134
Aatf	apoptosis antagonizing transcription factor	0.0135
Bola3	bolA-like 3 (E. coli)	0.0136
Il31	interleukin 31	0.0136
Acvr2b	activin receptor IIB	0.0137
Homer1	homer homolog 1 (Drosophila)	0.0138
Ctsb	cathepsin B	0.0139
Stmn3	stathmin-like 3	0.0139
Pggt1b	protein geranylgeranyltransferase type I, beta subunit	0.014
Cdc37	cell division cycle 37 homolog (S. cerevisiae)	0.014
Alas2	aminolevulinic acid synthase 2, erythroid	0.014
Acox2	acyl-Coenzyme A oxidase 2, branched chain	0.0141
Srp14	signal recognition particle 14	0.0141
Ythdc1	YTH domain containing 1	0.0141
Slc22a12	solute carrier family 22 (organic anion/cation transporter), member 12	0.0142
Mesp1	mesoderm posterior 1	0.0142
Vcp	---	0.0143
Smarcc2	SWI/SNF related, matrix associated, actin dependent regulator of chromatin, subfamily c, member 2	0.0143
Mrpl55	mitochondrial ribosomal protein L55	0.0143
Dtx1	deltex 1 homolog (Drosophila)	0.0143
Bbc3	BCL2 binding component 3	0.0143
Fgg	fibrinogen gamma chain	0.0144
Mgst1	microsomal glutathione S-transferase 1	0.0144
Mtch1	mitochondrial carrier homolog 1 (C. elegans)	0.0144
Ndufa13	NADH dehydrogenase (ubiquinone) 1 alpha subcomplex, 13	0.0144
St13	suppression of tumorigenicity 13	0.0144
Ttc30b	tetratricopeptide repeat domain 30B	0.0146
Mdh1b	malate dehydrogenase 1B, NAD (soluble)	0.0146
Cryzl1	crystallin, zeta (quinone reductase)-like 1	0.0146
H2afx	H2A histone family, member X	0.0148
Drg2	developmentally regulated GTP binding protein 2	0.0148
Tcf15	---	0.0149
Surf6	surfeit gene 6	0.0149
Galnt9	UDP-N-acetyl-alpha-D-galactosamine:polypeptide N-acetylgalactosaminyltransferase 9	0.0149
Cfl1	cofilin 1, non-muscle	0.0149
Aqp2	aquaporin 2	0.0149
Tnrc6b	trinucleotide repeat containing 6b	0.015
Rbm11	RNA binding motif protein 11	0.0151
Optc	opticin	0.0151
Wdsof1	WD repeats and SOF domain containing 1	0.0152
Nab2	Ngfi-A binding protein 2	0.0153
Scap	SREBF chaperone	0.0153
Pou5f1	POU domain, class 5, transcription factor 1	0.0154
Phf20	PHD finger protein 20	0.0154
Dyrk4	dual-specificity tyrosine-(Y)-phosphorylation regulated kinase 4	0.0154
Sema3b	sema domain, immunoglobulin domain (Ig), short basic domain, secreted, (semaphorin) 3B	0.0156
Slc27a1	solute carrier family 27 (fatty acid transporter), member 1	0.0156
Tmem158	transmembrane protein 158	0.0156
Ttc3	tetratricopeptide repeat domain 3	0.0157
Ushbp1	Usher syndrome 1C binding protein 1	0.0157
Snrpn	small nuclear ribonucleoprotein N	0.0158
Fbxo44	F-box protein 44	0.0158
Sord	sorbitol dehydrogenase	0.0159
Plag1	pleiomorphic adenoma gene 1	0.0159
Pgam5	phosphoglycerate mutase family member 5	0.0159
Mybph	myosin binding protein H	0.0159
Loh12cr1	loss of heterozygosity, 12, chromosomal region 1 homolog (human)	0.0159
Trim28	tripartite motif-containing 28	0.016
Ptk2b	PTK2 protein tyrosine kinase 2 beta	0.016
Ntf3	neurotrophin 3	0.016
Mrfap1	Morf4 family associated protein 1	0.016
Bcorl1	BCL6 co-repressor-like 1	0.0161
Cd9	CD9 antigen	0.0161
Ambp	alpha 1 microglobulin/bikunin	0.0162
G0s2	G0/G1 switch gene 2	0.0162
Pcolce2	procollagen C-endopeptidase enhancer 2	0.0162
Hsp90aa1	heat shock protein 90, alpha (cytosolic), class A member 1	0.0163
Limd2	LIM domain containing 2	0.0163
Pax9	paired box gene 9	0.0164
Orm1	orosomucoid 1	0.0164
Lmnb2	lamin B2	0.0164
Prps2	phosphoribosyl pyrophosphate synthetase 2	0.0166
B4galnt4	beta-1,4-N-acetyl-galactosaminyl transferase 4	0.0167
Tdgf1	teratocarcinoma-derived growth factor 1	0.0167
Slc36a3	solute carrier family 36 (proton/amino acid symporter), member 3	0.0168
Hmg20b	high mobility group 20 B	0.0169
Igf2	insulin-like growth factor 2	0.0169
Psmc5	protease (prosome, macropain) 26S subunit, ATPase 5	0.0169
Recql4	RecQ protein-like 4	0.0169
Slk	STE20-like kinase (yeast)	0.017
Kars	lysyl-tRNA synthetase	0.017
Actn4	actinin alpha 4	0.017
Banp	BTG3 associated nuclear protein	0.0171
Sdk1	sidekick homolog 1 (chicken)	0.0172
Tspo	translocator protein	0.0173
Rsl1d1	ribosomal L1 domain containing 1	0.0174
Sdha	succinate dehydrogenase complex, subunit A, flavoprotein (Fp)	0.0174
Vwce	von Willebrand factor C and EGF domains	0.0174
Tff1	trefoil factor 1	0.0175
Psmb7	proteasome (prosome, macropain) subunit, beta type 7	0.0175
Barhl1	BarH-like 1 (Drosophila)	0.0175
Prmt7	protein arginine N-methyltransferase 7	0.0176
Megf6	multiple EGF-like-domains 6	0.0176
Gcnt2	glucosaminyl (N-acetyl) transferase 2, I-branching enzyme	0.0177
Aurkaip1	---	0.0178
Foxb1	forkhead box B1	0.018
Nudt9	nudix (nucleoside diphosphate linked moiety X)-type motif 9	0.018
Adamts9	a disintegrin-like and metallopeptidase (reprolysin type) with thrombospondin type 1 motif, 9	0.0181
Pet112l	PET112-like (yeast)	0.0183
Add2	adducin 2 (beta)	0.0184
Chtf18	CTF18, chromosome transmission fidelity factor 18 homolog (S. cerevisiae)	0.0184
Ppp1r3f	protein phosphatase 1, regulatory (inhibitor) subunit 3F	0.0184
Ier5	immediate early response 5	0.0185
Scn3a	sodium channel, voltage-gated, type III, alpha	0.0185
Calca	calcitonin/calcitonin-related polypeptide, alpha	0.0186
Eif5b	eukaryotic translation initiation factor 5B	0.0186
Homer3	homer homolog 3 (Drosophila)	0.0186
Apc2	adenomatosis polyposis coli 2	0.0187
Nhlh2	nescient helix loop helix 2	0.0188
Dph2	DPH2 homolog (S. cerevisiae)	0.0189
S100a13	S100 calcium binding protein A13	0.019
Add1	adducin 1 (alpha)	0.0191
Dmkn	dermokine	0.0191
Esco1	establishment of cohesion 1 homolog 1 (S. cerevisiae)	0.0192
Lta4h	leukotriene A4 hydrolase	0.0192
Rmnd5a	required for meiotic nuclear division 5 homolog A (S. cerevisiae)	0.0192
Sox4	SRY-box containing gene 4	0.0193
Slc35b4	solute carrier family 35, member B4	0.0193
Scarf2	scavenger receptor class F, member 2	0.0193
Lix1	limb expression 1 homolog (chicken)	0.0193
Cks1b	CDC28 protein kinase 1b	0.0193
Ascc2	activating signal cointegrator 1 complex subunit 2	0.0193
Thpo	thrombopoietin	0.0194
Ctbp1	C-terminal binding protein 1	0.0195
Impdh1	inosine 5'-phosphate dehydrogenase 1	0.0195
Mcm7	minichromosome maintenance deficient 7 (S. cerevisiae)	0.0195
Rnpepl1	arginyl aminopeptidase (aminopeptidase B)-like 1	0.0195
Abl1	c-abl oncogene 1, receptor tyrosine kinase	0.0196
Acbd6	acyl-Coenzyme A binding domain containing 6	0.0196
Bai1	brain-specific angiogenesis inhibitor 1	0.0196
Camk2n1	calcium/calmodulin-dependent protein kinase II inhibitor 1	0.0197
Ccdc34	coiled-coil domain containing 34	0.0197
Fuz	fuzzy homolog (Drosophila)	0.0197
Hmbox1	homeobox containing 1	0.0197
Ibsp	integrin binding sialoprotein	0.0197
Mrpl2	mitochondrial ribosomal protein L2	0.0198
Kcnk12	potassium channel, subfamily K, member 12	0.0198
Wdr74	WD repeat domain 74	0.0199
Dcun1d2	DCN1, defective in cullin neddylation 1, domain containing 2 (S. cerevisiae)	0.0199
Card10	caspase recruitment domain family, member 10	0.0199
Arhgap24	Rho GTPase activating protein 24	0.0201
Lzic	leucine zipper and CTNNBIP1 domain containing	0.0201
Gsk3a	glycogen synthase kinase 3 alpha	0.0202
Pnpla2	patatin-like phospholipase domain containing 2	0.0202
Pfn1	profilin 1	0.0203
Pskh1	protein serine kinase H1	0.0203
Rai1	retinoic acid induced 1	0.0203
Ctdp1	CTD (carboxy-terminal domain, RNA polymerase II, polypeptide A) phosphatase, subunit 1	0.0204
Ggps1	geranylgeranyl diphosphate synthase 1	0.0205
Bcs1l	BCS1-like (yeast)	0.0205
Adamtsl1	ADAMTS-like 1	0.0205
Slc35f3	solute carrier family 35, member F3	0.0206
Lrp10	low-density lipoprotein receptor-related protein 10	0.0206
Lgals9	lectin, galactose binding, soluble 9	0.0206
Aak1	AP2 associated kinase 1	0.0206
Fastk	Fas-activated serine/threonine kinase	0.0208
Rpl22l1	---	0.0208
Slc16a6	solute carrier family 16 (monocarboxylic acid transporters), member 6	0.0208
Slc26a1	solute carrier family 26 (sulfate transporter), member 1	0.0208
Tpm3	tropomyosin 3, gamma	0.0208
Cxcl12	chemokine (C-X-C motif) ligand 12	0.0209
Nodal	nodal	0.0209
Zic1	zinc finger protein of the cerebellum 1	0.021
Tnfrsf13b	tumor necrosis factor receptor superfamily, member 13b	0.021
Igsf3	immunoglobulin superfamily, member 3	0.021
Eif4e	eukaryotic translation initiation factor 4E	0.021
Cnot2	CCR4-NOT transcription complex, subunit 2	0.021
Rbm8a	RNA binding motif protein 8a	0.0211
Wfdc5	WAP four-disulfide core domain 5	0.0212
Lin9	lin-9 homolog (C. elegans)	0.0212
Lgals12	lectin, galactose binding, soluble 12	0.0212
Ehmt2	euchromatic histone lysine N-methyltransferase 2	0.0212
Cd300c	CD300C antigen	0.0212
Fus	fusion, derived from t(12;16) malignant liposarcoma (human)	0.0213
Kcnab2	potassium voltage-gated channel, shaker-related subfamily, beta member 2	0.0213
Pank2	pantothenate kinase 2 (Hallervorden-Spatz syndrome)	0.0213
Cgref1	cell growth regulator with EF hand domain 1	0.0214
Commd4	COMM domain containing 4	0.0214
Ptprk	protein tyrosine phosphatase, receptor type, K	0.0214
Yeats4	YEATS domain containing 4	0.0216
Gpr162	G protein-coupled receptor 162	0.0216
Tert	telomerase reverse transcriptase	0.0217
Mars	methionine-tRNA synthetase	0.0217
Katnb1	katanin p80 (WD40-containing) subunit B 1	0.0217
Hpd	4-hydroxyphenylpyruvic acid dioxygenase	0.0217
Ltbp4	latent transforming growth factor beta binding protein 4	0.0218
Mosc2	MOCO sulphurase C-terminal domain containing 2	0.0218
Pdcd5	programmed cell death 5	0.0218
Prdx2	peroxiredoxin 2	0.0218
Sprr2b	small proline-rich protein 2B	0.0218
Prkag2	protein kinase, AMP-activated, gamma 2 non-catalytic subunit	0.0219
Prr3	proline-rich polypeptide 3	0.0219
Ptges3	prostaglandin E synthase 3 (cytosolic)	0.0219
Slc13a3	solute carrier family 13 (sodium-dependent dicarboxylate transporter), member 3	0.0219
Fez2	fasciculation and elongation protein zeta 2 (zygin II)	0.022
Kif12	kinesin family member 12	0.022
Rsrc1	arginine/serine-rich coiled-coil 1	0.022
Tsfm	Ts translation elongation factor, mitochondrial	0.0221
Sema3d	sema domain, immunoglobulin domain (Ig), short basic domain, secreted, (semaphorin) 3D	0.0221
Cbfa2t2	core-binding factor, runt domain, alpha subunit 2, translocated to, 2 (human)	0.0221
Ltb4r2	leukotriene B4 receptor 2	0.0222
Lgals7	lectin, galactose binding, soluble 7	0.0223
Fgfr1	fibroblast growth factor receptor 1	0.0223
Dok2	docking protein 2	0.0224
Tbc1d12	TBC1D12: TBC1 domain family, member 12	0.0224
Emilin1	elastin microfibril interfacer 1	0.0225
Fabp1	fatty acid binding protein 1, liver	0.0225
Sdk2	sidekick homolog 2 (chicken)	0.0225
Wdr90	WD repeat domain 90	0.0227
Mtmr1	myotubularin related protein 1	0.0227
Smarca4	SWI/SNF related, matrix associated, actin dependent regulator of chromatin, subfamily a, member 4	0.0228
Pgm5	phosphoglucomutase 5	0.0228
Gfap	glial fibrillary acidic protein	0.0228
Baalc	brain and acute leukemia, cytoplasmic	0.0228
Adrm1	---	0.0228
Yif1a	Yip1 interacting factor homolog A (S. cerevisiae)	0.0229
Ttll3	tubulin tyrosine ligase-like family, member 3	0.0229
Pklr	pyruvate kinase liver and red blood cell	0.0229
Kcnk7	potassium channel, subfamily K, member 7	0.0229
Hmgb1	high mobility group box 1	0.023
Klc3	kinesin light chain 3	0.0231
Krt13	keratin 13	0.0231
Pcgf6	polycomb group ring finger 6	0.0231
Hdac2	histone deacetylase 2	0.0232
Mta1	metastasis associated 1	0.0232
Vipr2	vasoactive intestinal peptide receptor 2	0.0233
Cdh23	cadherin 23 (otocadherin)	0.0233
Tmem54	transmembrane protein 54	0.0234
Smyd1	SET and MYND domain containing 1	0.0234
Sh3rf2	SH3 domain containing ring finger 2	0.0234
Plekha6	pleckstrin homology domain containing, family A member 6	0.0234
Itgb7	integrin beta 7	0.0234
Dtymk	deoxythymidylate kinase	0.0234
Zgpat	zinc finger, CCCH-type with G patch domain	0.0235
Emg1	EMG1 nucleolar protein homolog (S. cerevisiae)	0.0235
Asb10	ankyrin repeat and SOCS box-containing 10	0.0236
Cdca3	cell division cycle associated 3	0.0236
Ddx27	DEAD (Asp-Glu-Ala-Asp) box polypeptide 27	0.0236
Lipt1	lipoyltransferase 1	0.0236
Traf7	TNF receptor-associated factor 7	0.0236
Bbs5	Bardet-Biedl syndrome 5 (human)	0.0237
Ppp1r1a	protein phosphatase 1, regulatory (inhibitor) subunit 1A	0.0238
Mvp	major vault protein	0.0238
Rbm16	RNA binding motif protein 16	0.0239
Vps8	vacuolar protein sorting 8 homolog (S. cerevisiae)	0.024
Sympk	symplekin	0.024
Phactr1	phosphatase and actin regulator 1	0.024
Rtn2	reticulon 2 (Z-band associated protein)	0.0241
Cdh22	cadherin 22	0.0242
Cdsn	corneodesmosin	0.0242
Cldn14	claudin 14	0.0242
Lepre1	leprecan 1	0.0242
Pfkfb3	6-phosphofructo-2-kinase/fructose-2,6-biphosphatase 3	0.0242
Sirt7	sirtuin 7 (silent mating type information regulation 2, homolog) 7 (S. cerevisiae)	0.0242
Fam120c	family with sequence similarity 120, member C	0.0243
Mrpl3	mitochondrial ribosomal protein L3	0.0243
Slc4a1	solute carrier family 4 (anion exchanger), member 1	0.0244
Ddx24	DEAD (Asp-Glu-Ala-Asp) box polypeptide 24	0.0244
Cc2d1a	coiled-coil and C2 domain containing 1A	0.0244
Ube2h	ubiquitin-conjugating enzyme E2H	0.0245
Rps14	ribosomal protein S14	0.0245
Mc3r	melanocortin 3 receptor	0.0245
Cacna1a	calcium channel, voltage-dependent, P/Q type, alpha 1A subunit	0.0245
Slc26a10	solute carrier family 26, member 10	0.0246
Abcc2	ATP-binding cassette, sub-family C (CFTR/MRP), member 2	0.0247
Chm	choroidermia	0.0247
Dgke	diacylglycerol kinase, epsilon	0.0249
Mrpl18	---	0.0249
Trpc7	transient receptor potential cation channel, subfamily C, member 7	0.0249
Rtn4	reticulon 4	0.025
Ppp4r2	protein phosphatase 4, regulatory subunit 2	0.025
Mrpl33	mitochondrial ribosomal protein L33	0.025
Sumo1	SMT3 suppressor of mif two 3 homolog 1 (yeast)	0.0251
Sh3bgrl2	SH3 domain binding glutamic acid-rich protein like 2	0.0251
Hebp2	heme binding protein 2	0.0251
Phf14	PHD finger protein 14	0.0252
Lsm4	LSM4 homolog, U6 small nuclear RNA associated (S. cerevisiae)	0.0252
Hmga2	high mobility group AT-hook 2	0.0252
Wdr24	WD repeat domain 24	0.0253
Yipf3	Yip1 domain family, member 3	0.0254
Zdhhc5	zinc finger, DHHC domain containing 5	0.0254
Acsl4	acyl-CoA synthetase long-chain family member 4	0.0255
Areg	amphiregulin	0.0255
Otud7a	OTU domain containing 7A	0.0256
Clk3	CDC-like kinase 3	0.0256
Acacb	acetyl-Coenzyme A carboxylase beta	0.0257
Brwd1	bromodomain and WD repeat domain containing 1	0.0258
Prpf19	PRP19/PSO4 pre-mRNA processing factor 19 homolog (S. cerevisiae)	0.026
Slc1a1	solute carrier family 1 (neuronal/epithelial high affinity glutamate transporter, system Xag), member 1	0.026
Wnt3	wingless-related MMTV integration site 3	0.026
Smc1a	structural maintenance of chromosomes 1A	0.0261
Foxq1	forkhead box Q1	0.0261
Asah1	N-acylsphingosine amidohydrolase 1	0.0261
Pex6	peroxisomal biogenesis factor 6	0.0262
Aadat	aminoadipate aminotransferase	0.0262
Rps2	---	0.0263
Rfk	riboflavin kinase	0.0263
Psmf1	proteasome (prosome, macropain) inhibitor subunit 1	0.0263
Pmpca	peptidase (mitochondrial processing) alpha	0.0263
P4ha2	procollagen-proline, 2-oxoglutarate 4-dioxygenase (proline 4-hydroxylase), alpha II polypeptide	0.0263
Crocc	ciliary rootlet coiled-coil, rootletin	0.0263
Cdc25c	cell division cycle 25 homolog C (S. pombe)	0.0264
Zfand2b	zinc finger, AN1 type domain 2B	0.0264
Fxyd5	FXYD domain-containing ion transport regulator 5	0.0265
Pddc1	Parkinson disease 7 domain containing 1	0.0265
Tex264	testis expressed gene 264	0.0265
Cdca7l	cell division cycle associated 7 like	0.0266
Tceb2	transcription elongation factor B (SIII), polypeptide 2	0.0266
Prg2	proteoglycan 2, bone marrow	0.0267
Npc1l1	NPC1-like 1	0.0267
Aldh5a1	aldhehyde dehydrogenase family 5, subfamily A1	0.0268
Ctrl	chymotrypsin-like	0.0269
Crybb2	crystallin, beta B2	0.027
Hmgcr	3-hydroxy-3-methylglutaryl-Coenzyme A reductase	0.027
Vbp1	von Hippel-Lindau binding protein 1	0.0271
Papd4	PAP associated domain containing 4	0.0273
Fgf21	fibroblast growth factor 21	0.0273
Mrps25	mitochondrial ribosomal protein S25	0.0275
Mdk	midkine	0.0275
Fbxl20	F-box and leucine-rich repeat protein 20	0.0275
Atp2b3	ATPase, Ca++ transporting, plasma membrane 3	0.0275
Atg4b	autophagy-related 4B (yeast)	0.0275
Tspan10	tetraspanin 10	0.0276
Serpini2	serine (or cysteine) peptidase inhibitor, clade I, member 2	0.0277
Slfnl1	schlafen like 1	0.0277
Hcn2	hyperpolarization-activated, cyclic nucleotide-gated K+ 2	0.0278
Lama1	laminin, alpha 1	0.0278
Mamdc2	MAM domain containing 2	0.0278
Xab2	XPA binding protein 2	0.0278
Ywhab	tyrosine 3-monooxygenase/tryptophan 5-monooxygenase activation protein, beta polypeptide	0.0278
Retn	resistin	0.0279
Marveld2	MARVEL (membrane-associating) domain containing 2	0.028
Ccdc97	coiled-coil domain containing 97	0.0281
Dspp	dentin sialophosphoprotein	0.0281
Kcnc3	potassium voltage gated channel, Shaw-related subfamily, member 3	0.0282
Panx2	pannexin 2	0.0282
Tmem5	transmembrane protein 5	0.0282
Tusc4	tumor suppressor candidate 4	0.0282
Wrnip1	Werner helicase interacting protein 1	0.0282
Foxd4	forkhead box D4	0.0283
Gpaa1	GPI anchor attachment protein 1	0.0283
Lysmd1	LysM, putative peptidoglycan-binding, domain containing 1	0.0283
Nup93	nucleoporin 93	0.0284
Igfbp1	insulin-like growth factor binding protein 1	0.0284
Edn2	endothelin 2	0.0284
Atm	ataxia telangiectasia mutated homolog (human)	0.0284
Mrpl4	mitochondrial ribosomal protein L4	0.0285
Irf7	interferon regulatory factor 7	0.0285
Gdpd5	glycerophosphodiester phosphodiesterase domain containing 5	0.0286
Catsper3	cation channel, sperm associated 3	0.0286
Atp5j2	ATP synthase, H+ transporting, mitochondrial F0 complex, subunit f, isoform 2	0.0287
Crtc1	CREB regulated transcription coactivator 1	0.0287
Mybpc1	myosin binding protein C, slow-type	0.0287
Ube2o	ubiquitin-conjugating enzyme E2O	0.0287
Dmgdh	dimethylglycine dehydrogenase precursor	0.0288
Lrdd	leucine-rich and death domain containing	0.0288
Man2b2	mannosidase 2, alpha B2	0.0288
Os9	amplified in osteosarcoma	0.0288
Wnt6	wingless-related MMTV integration site 6	0.0289
Rhobtb2	Rho-related BTB domain containing 2	0.0291
Mib2	mindbomb homolog 2 (Drosophila)	0.0291
Banf1	barrier to autointegration factor 1	0.0291
Smc6	structural maintenance of chromosomes 6	0.0292
Scand1	SCAN domain-containing 1	0.0292
Dgkz	diacylglycerol kinase zeta	0.0293
Nde1	nuclear distribution gene E homolog 1 (A nidulans)	0.0293
Rbm15b	RNA binding motif protein 15B	0.0293
Cpt1c	carnitine palmitoyltransferase 1c	0.0294
Mef2b	myocyte enhancer factor 2B	0.0294
Pml	promyelocytic leukemia	0.0294
St6galnac4	ST6 (alpha-N-acetyl-neuraminyl-2,3-beta-galactosyl-1,3)-N-acetylgalactosaminide alpha-2,6-sialyltransferase 4	0.0294
Cel	carboxyl ester lipase	0.0295
Elf3	E74-like factor 3	0.0295
Tyr	tyrosinase	0.0295
Unkl	unkempt-like (Drosophila)	0.0295
Serpine2	serine (or cysteine) peptidase inhibitor, clade E, member 2	0.0296
Rbmx	RNA binding motif protein, X chromosome	0.0296
Mark2	MAP/microtubule affinity-regulating kinase 2	0.0296
Cox7a2l	cytochrome c oxidase subunit VIIa polypeptide 2-like	0.0296
Arf1	ADP-ribosylation factor 1	0.0296
Osbpl6	oxysterol binding protein-like 6	0.0297
Ddx4	DEAD (Asp-Glu-Ala-Asp) box polypeptide 4	0.0297
Ap3d1	adaptor-related protein complex 3, delta 1 subunit	0.0297
Tnfsf11	tumor necrosis factor (ligand) superfamily, member 11	0.0298
Ss18	synovial sarcoma translocation, Chromosome 18	0.0298
Il13	interleukin 13	0.0299
Kif22	kinesin family member 22	0.0299
Clpp	caseinolytic peptidase, ATP-dependent, proteolytic subunit homolog (E. coli)	0.03
Cldn4	claudin 4	0.0301
Rps6ka3	ribosomal protein S6 kinase polypeptide 3	0.0301
Wdr33	WD repeat domain 33	0.0302
Traip	TRAF-interacting protein	0.0302
Klf1	Kruppel-like factor 1 (erythroid)	0.0303
Lage3	L antigen family, member 3	0.0304
Nosip	nitric oxide synthase interacting protein	0.0304
Prmt8	protein arginine N-methyltransferase 8	0.0304
Slc7a8	solute carrier family 7 (cationic amino acid transporter, y+ system), member 8	0.0304
Bcan	brevican	0.0305
Rrbp1	ribosome binding protein 1	0.0305
Sftpa1	surfactant associated protein A1	0.0305
Yap1	yes-associated protein 1	0.0305
Afp	alpha fetoprotein	0.0306
Kcnmb1	potassium large conductance calcium-activated channel, subfamily M, beta member 1	0.0306
Ublcp1	---	0.0306
Spg7	spastic paraplegia 7 homolog (human)	0.0307
Spata20	spermatogenesis associated 20	0.0307
Mthfsd	methenyltetrahydrofolate synthetase domain containing	0.0307
Mdm4	transformed mouse 3T3 cell double minute 4	0.0307
Tcfl5	transcription factor-like 5 (basic helix-loop-helix)	0.0308
Rpp30	ribonuclease P/MRP 30 subunit (human)	0.0308
Bnipl	BCL2/adenovirus E1B 19kD interacting protein like	0.0308
Sp3	trans-acting transcription factor 3	0.0309
Map3k11	mitogen-activated protein kinase kinase kinase 11	0.0309
Hey2	hairy/enhancer-of-split related with YRPW motif 2	0.0309
Arvcf	armadillo repeat gene deleted in velo-cardio-facial syndrome	0.0309
Fgfr4	fibroblast growth factor receptor 4	0.031
Tomm7	translocase of outer mitochondrial membrane 7 homolog (yeast)	0.031
Ccdc59	coiled-coil domain containing 59	0.0311
Scyl1	SCY1-like 1 (S. cerevisiae)	0.0313
Ndufs2	NADH dehydrogenase (ubiquinone) Fe-S protein 2	0.0313
Hdhd1a	haloacid dehalogenase-like hydrolase domain containing 1A	0.0313
Cabin1	calcineurin binding protein 1	0.0314
Rpl13a	---	0.0314
Npdc1	neural proliferation, differentiation and control gene 1	0.0315
Sh3pxd2b	SH3 and PX domains 2B	0.0316
Hcfc1r1	host cell factor C1 regulator 1 (XPO1-dependent)	0.0316
Fhad1	forkhead-associated (FHA) phosphopeptide binding domain 1	0.0316
Adcy5	adenylate cyclase 5	0.0317
Arid1a	AT rich interactive domain 1A (SWI-like)	0.0317
Ccdc77	coiled-coil domain containing 77	0.0317
Phip	pleckstrin homology domain interacting protein	0.0318
Cox17	cytochrome c oxidase, subunit XVII assembly protein homolog (yeast)	0.0319
Il13ra2	---	0.0319
Ints4	integrator complex subunit 4	0.0319
Sltm	SAFB-like, transcription modulator	0.032
Nsbp1	nucleosome binding protein 1	0.032
Fam38b	family with sequence similarity 38, member B	0.032
Akap8l	A kinase (PRKA) anchor protein 8-like	0.0321
Sla2	Src-like-adaptor 2	0.0321
Tex10	testis expressed gene 10	0.0321
Hmgn3	high mobility group nucleosomal binding domain 3	0.0322
Rab3gap2	RAB3 GTPase activating protein subunit 2	0.0322
Arv1	ARV1 homolog (yeast)	0.0323
Camkk2	calcium/calmodulin-dependent protein kinase kinase 2, beta	0.0324
Polr2f	polymerase (RNA) II (DNA directed) polypeptide F	0.0324
Zc3h8	zinc finger CCCH type containing 8	0.0325
Tnfaip8l1	tumor necrosis factor, alpha-induced protein 8-like 1	0.0325
Haao	3-hydroxyanthranilate 3,4-dioxygenase	0.0325
Dlx1	distal-less homeobox 1	0.0325
Ccdc86	coiled-coil domain containing 86	0.0325
Armc5	armadillo repeat containing 5	0.0326
Zfp2	zinc finger protein 2	0.0326
Gga1	golgi associated, gamma adaptin ear containing, ARF binding protein 1	0.0327
Hip1r	huntingtin interacting protein 1 related	0.0328
H2afy	H2A histone family, member Y	0.0329
Magea6	melanoma antigen, family A, 6	0.0329
Ddx39	DEAD (Asp-Glu-Ala-Asp) box polypeptide 39	0.033
Aup1	ancient ubiquitous protein 1	0.033
Ap1m2	adaptor protein complex AP-1, mu 2 subunit	0.0332
Rgs11	regulator of G-protein signaling 11	0.0333
Pmch	pro-melanin-concentrating hormone	0.0333
Pemt	phosphatidylethanolamine N-methyltransferase	0.0333
Ngrn	neugrin, neurite outgrowth associated	0.0333
Hist2h2be	histone cluster 2, H2be	0.0333
Ly6d	lymphocyte antigen 6 complex, locus D	0.0334
Wdr77	WD repeat domain 77	0.0335
Plg	plasminogen	0.0335
Pias4	protein inhibitor of activated STAT 4	0.0335
Lce1f	late cornified envelope 1F	0.0335
Cenpa	centromere protein A	0.0335
Entpd8	ectonucleoside triphosphate diphosphohydrolase 8	0.0336
Npas3	neuronal PAS domain protein 3	0.0336
Hoxc9	homeo box C9	0.0337
Api5	apoptosis inhibitor 5	0.0337
Pes1	pescadillo homolog 1, containing BRCT domain (zebrafish)	0.0338
Setd4	SET domain containing 4	0.0338
Rmnd5b	required for meiotic nuclear division 5 homolog B (S. cerevisiae)	0.034
Lrp8	low density lipoprotein receptor-related protein 8, apolipoprotein e receptor	0.0342
Ogdh	oxoglutarate dehydrogenase (lipoamide)	0.0344
Nkx6-1	NK6 homeobox 1	0.0344
Prpf40a	PRP40 pre-mRNA processing factor 40 homolog A (yeast)	0.0345
Egf	epidermal growth factor	0.0346
Dynlrb1	dynein light chain roadblock-type 1	0.0348
Ephb3	Eph receptor B3	0.0348
Gnb2	guanine nucleotide binding protein (G protein), beta 2	0.0348
Tcof1	Treacher Collins Franceschetti syndrome 1, homolog	0.0348
Tmtc4	transmembrane and tetratricopeptide repeat containing 4	0.0348
Sytl1	synaptotagmin-like 1	0.0349
Sfn	stratifin	0.0349
Rnps1	ribonucleic acid binding protein S1	0.0349
Apoa2	apolipoprotein A-II	0.0349
Figf	c-fos induced growth factor	0.035
Arl11	ADP-ribosylation factor-like 11	0.0351
R3hdm2	R3H domain containing 2	0.0351
Btf3	basic transcription factor 3	0.0353
Sfrp1	secreted frizzled-related protein 1	0.0353
Srp68	signal recognition particle 68	0.0354
Lbx1	ladybird homeobox homolog 1 (Drosophila)	0.0354
Immt	inner membrane protein, mitochondrial	0.0354
Coro6	coronin 6	0.0354
Bdh2	3-hydroxybutyrate dehydrogenase, type 2	0.0354
Robo2	roundabout homolog 2 (Drosophila)	0.0355
Hyal2	hyaluronoglucosaminidase 2	0.0356
Ntsr2	neurotensin receptor 2	0.0356
Sh3tc1	SH3 domain and tetratricopeptide repeats 1	0.0357
Ptprn	protein tyrosine phosphatase, receptor type, N	0.0357
Cenpb	centromere protein B	0.0358
Hist1h2bc	histone cluster 1, H2bc	0.0358
Eef1b2	eukaryotic translation elongation factor 1 beta 2	0.0359
Dhx9	DEAH (Asp-Glu-Ala-His) box polypeptide 9	0.0359
Exosc5	exosome component 5	0.036
Mov10	Moloney leukemia virus 10	0.036
Ran	RAN, member RAS oncogene family	0.0361
Parp1	poly (ADP-ribose) polymerase family, member 1	0.0361
Lrpap1	low density lipoprotein receptor-related protein associated protein 1	0.0361
Clic1	chloride intracellular channel 1	0.0361
Prdx6	peroxiredoxin 6	0.0362
Hspa1a	heat shock protein 1A	0.0362
Hecw1	HECT, C2 and WW domain containing E3 ubiquitin protein ligase 1	0.0362
Capn10	calpain 10	0.0362
C1d	C1D nuclear receptor co-repressor	0.0362
Mta2	metastasis-associated gene family, member 2	0.0363
Scn8a	sodium channel, voltage-gated, type VIII, alpha	0.0364
Rassf8	Ras association (RalGDS/AF-6) domain family (N-terminal) member 8	0.0364
Mbd3	methyl-CpG binding domain protein 3	0.0364
Impdh2	---	0.0365
Polr2b	polymerase (RNA) II (DNA directed) polypeptide B	0.0367
Plk1	polo-like kinase 1 (Drosophila)	0.0367
Mycbp	c-myc binding protein	0.0367
Fscn1	fascin homolog 1, actin bundling protein (Strongylocentrotus purpuratus)	0.0367
Actl7b	actin-like 7b	0.0367
Phb2	prohibitin 2	0.0368
Dhdh	dihydrodiol dehydrogenase (dimeric)	0.037
Gvin1	GTPase, very large interferon inducible 1	0.0371
Bola1	bolA-like 1 (E. coli)	0.0371
Foxp4	forkhead box P4	0.0372
Trim35	tripartite motif-containing 35	0.0372
Ahsg	alpha-2-HS-glycoprotein	0.0373
Gnaz	guanine nucleotide binding protein, alpha z subunit	0.0373
Kif9	kinesin family member 9	0.0373
Pkm2	pyruvate kinase, muscle	0.0373
Trim29	tripartite motif-containing 29	0.0374
Tcea2	transcription elongation factor A (SII), 2	0.0374
Adk	adenosine kinase	0.0374
Adam32	a disintegrin and metallopeptidase domain 32	0.0374
Dkk4	dickkopf homolog 4 (Xenopus laevis)	0.0375
Dnmt3a	DNA methyltransferase 3A	0.0375
Gadd45gip1	growth arrest and DNA-damage-inducible, gamma interacting protein 1	0.0375
Hsf1	heat shock factor 1	0.0375
Lgi1	leucine-rich repeat LGI family, member 1	0.0375
S100g	S100 calcium binding protein G	0.0375
Ngfrap1	nerve growth factor receptor (TNFRSF16) associated protein 1	0.0376
Herpud2	HERPUD family member 2	0.0376
Cdc42ep1	CDC42 effector protein (Rho GTPase binding) 1	0.0376
Chd1l	chromodomain helicase DNA binding protein 1-like	0.0377
Fgr	Gardner-Rasheed feline sarcoma viral (Fgr) oncogene homolog	0.0378
Nutf2	nuclear transport factor 2	0.0381
Astl	astacin-like metalloendopeptidase (M12 family)	0.0381
Ednrb	endothelin receptor type B	0.0382
Ptcd2	pentatricopeptide repeat domain 2	0.0382
Pspc1	paraspeckle protein 1	0.0383
Ddr1	discoidin domain receptor family, member 1	0.0383
Pfdn2	prefoldin 2	0.0384
Pth	parathyroid hormone	0.0384
Tmem66	transmembrane protein 66	0.0384
Insm1	insulinoma-associated 1	0.0385
Rpl7l1	ribosomal protein L7-like 1	0.0385
Tmem160	transmembrane protein 160	0.0385
Tusc5	tumor suppressor candidate 5	0.0385
Penk	preproenkephalin	0.0386
Pdcd7	programmed cell death 7	0.0386
Mrps17	mitochondrial ribosomal protein S17	0.0387
Solh	small optic lobes homolog (Drosophila)	0.0387
Tubg2	tubulin, gamma 2	0.0388
Elavl1	ELAV (embryonic lethal, abnormal vision, Drosophila)-like 1 (Hu antigen R)	0.0389
Cit	citron	0.039
Tmprss4	transmembrane protease, serine 4	0.0391
Lbh	limb-bud and heart	0.0391
Ift52	intraflagellar transport 52 homolog (Chlamydomonas)	0.0391
Gpr3	G-protein coupled receptor 3	0.0391
Abca2	ATP-binding cassette, sub-family A (ABC1), member 2	0.0392
Dlg5	discs, large homolog 5 (Drosophila)	0.0392
Wdr54	WD repeat domain 54	0.0392
Ebpl	emopamil binding protein-like	0.0394
Lsm14a	LSM14 homolog A (SCD6, S. cerevisiae)	0.0394
Ppp2r2a	protein phosphatase 2 (formerly 2A), regulatory subunit B (PR 52), alpha isoform	0.0394
Pom121	nuclear pore membrane protein 121	0.0395
Polq	polymerase (DNA directed), theta	0.0395
Mrpl12	mitochondrial ribosomal protein L12	0.0395
Alb	albumin	0.0395
Znrf2	zinc and ring finger 2	0.0396
Lrpprc	leucine-rich PPR-motif containing	0.0396
Cenpt	centromere protein T	0.0397
Rnasen	ribonuclease III, nuclear	0.0397
Tle3	transducin-like enhancer of split 3, homolog of Drosophila E(spl)	0.0397
Elac2	---	0.0398
Azi1	5-azacytidine induced gene 1	0.0398
Ankrd2	ankyrin repeat domain 2 (stretch responsive muscle)	0.0399
Ephx1	epoxide hydrolase 1, microsomal	0.0399
Fgd5	FYVE, RhoGEF and PH domain containing 5	0.0399
Itga5	integrin alpha 5 (fibronectin receptor alpha)	0.0399
Nptx1	neuronal pentraxin 1	0.0399
Pcdh15	protocadherin 15	0.04
Col6a1	collagen, type VI, alpha 1	0.04
Anln	anillin, actin binding protein	0.04
Chrna4	cholinergic receptor, nicotinic, alpha polypeptide 4	0.0401
Esrra	estrogen related receptor, alpha	0.0401
Mybbp1a	MYB binding protein (P160) 1a	0.0401
Dync1li1	dynein cytoplasmic 1 light intermediate chain 1	0.0402
Lrp6	low density lipoprotein receptor-related protein 6	0.0402
Tfb1m	transcription factor B1, mitochondrial	0.0403
Scgb3a2	secretoglobin, family 3A, member 2	0.0403
Bri3bp	Bri3 binding protein	0.0403
Psmc3	proteasome (prosome, macropain) 26S subunit, ATPase 3	0.0404
Tor3a	torsin family 3, member A	0.0404
Alox15	arachidonate 15-lipoxygenase	0.0405
Gpr56	G protein-coupled receptor 56	0.0406
Lancl2	LanC (bacterial lantibiotic synthetase component C)-like 2	0.0407
Pqbp1	polyglutamine binding protein 1	0.0408
Pold1	polymerase (DNA directed), delta 1, catalytic subunit	0.0408
Ephb2	Eph receptor B2	0.0408
Ddx46	DEAD (Asp-Glu-Ala-Asp) box polypeptide 46	0.0408
Cacna1g	calcium channel, voltage-dependent, T type, alpha 1G subunit	0.0408
Apoa1bp	apolipoprotein A-I binding protein	0.0408
Ensa	endosulfine alpha	0.0409
Etfa	electron transferring flavoprotein, alpha polypeptide	0.0409
Gal3st3	galactose-3-O-sulfotransferase 3	0.0409
Nob1	NIN1/RPN12 binding protein 1 homolog (S. cerevisiae)	0.0409
Slc1a5	solute carrier family 1 (neutral amino acid transporter), member 5	0.0409
Bmp7	bone morphogenetic protein 7	0.041
Adamts12	a disintegrin-like and metallopeptidase (reprolysin type) with thrombospondin type 1 motif, 12	0.041
Cluap1	clusterin associated protein 1	0.0411
Hdac8	histone deacetylase 8	0.0411
Hbegf	heparin-binding EGF-like growth factor	0.0412
Fen1	flap structure specific endonuclease 1	0.0412
Cdkn3	cyclin-dependent kinase inhibitor 3	0.0412
Ccdc75	coiled-coil domain containing 75	0.0412
Ccdc113	coiled-coil domain containing 113	0.0412
Gabpb2	GA repeat binding protein, beta 2	0.0413
Dusp2	dual specificity phosphatase 2	0.0413
Ccdc50	coiled-coil domain containing 50	0.0413
C1galt1c1	C1GALT1-specific chaperone 1	0.0414
Mrps5	mitochondrial ribosomal protein S5	0.0414
Mtnr1b	melatonin receptor 1B	0.0414
Plekhh3	pleckstrin homology domain containing, family H (with MyTH4 domain) member 3	0.0415
F11r	F11 receptor	0.0416
Upk3a	uroplakin 3A	0.0416
Sit1	suppression inducing transmembrane adaptor 1	0.0417
Pole4	polymerase (DNA-directed), epsilon 4 (p12 subunit)	0.0417
Pkp4	plakophilin 4	0.0417
Cmya5	cardiomyopathy associated 5	0.0417
Ccdc43	coiled-coil domain containing 43	0.0418
Atpaf1	ATP synthase mitochondrial F1 complex assembly factor 1	0.0419
Clec2d	C-type lectin domain family 2, member d	0.0419
Pgd	phosphogluconate dehydrogenase	0.0419
Phb	prohibitin	0.0419
Timm8b	translocase of inner mitochondrial membrane 8 homolog b (yeast)	0.042
Dbnl	drebrin-like	0.042
Ccnd1	cyclin D1	0.0421
Cenpn	centromere protein N	0.0421
Pax3	paired box gene 3	0.0421
Wdr25	WD repeat domain 25	0.0421
Ppp1cb	protein phosphatase 1, catalytic subunit, beta isoform	0.0422
Itgb1	integrin beta 1 (fibronectin receptor beta)	0.0422
Srp9	signal recognition particle 9	0.0424
Lgmn	legumain	0.0424
Larp1	La ribonucleoprotein domain family, member 1	0.0425
Bsg	basigin	0.0425
Ap2a1	adaptor protein complex AP-2, alpha 1 subunit	0.0425
Pros1	protein S (alpha)	0.0426
Serpinb2	serine (or cysteine) peptidase inhibitor, clade B, member 2	0.0427
Aldh1l1	aldehyde dehydrogenase 1 family, member L1	0.0427
Tcte3	t-complex-associated testis expressed 3	0.0428
Wasf2	WAS protein family, member 2	0.0429
Fdxr	ferredoxin reductase	0.0429
Riok3	RIO kinase 3 (yeast)	0.043
Fmn2	formin 2	0.0431
Spsb4	splA/ryanodine receptor domain and SOCS box containing 4	0.0431
Pdlim2	PDZ and LIM domain 2	0.0432
Gpx3	glutathione peroxidase 3	0.0432
App	amyloid beta (A4) precursor protein	0.0433
Calm3	calmodulin 3	0.0433
Snapc4	small nuclear RNA activating complex, polypeptide 4	0.0433
Lsp1	lymphocyte specific 1	0.0434
Hrk	harakiri, BCL2 interacting protein (contains only BH3 domain)	0.0434
Fancm	Fanconi anemia, complementation group M	0.0434
Adarb2	adenosine deaminase, RNA-specific, B2	0.0436
Rbmx2	RNA binding motif protein, X-linked 2	0.0436
Tmem80	transmembrane protein 80	0.0436
Tsc22d4	TSC22 domain family, member 4	0.0436
Wdfy3	WD repeat and FYVE domain containing 3	0.0437
Hist1h1b	histone cluster 1, H1b	0.0437
Gpc3	glypican 3	0.0437
Dock8	dedicator of cytokinesis 8	0.0438
Fga	fibrinogen alpha chain	0.0438
Mtrf1l	mitochondrial translational release factor 1-like	0.0439
Rnf126	ring finger protein 126	0.044
Rpl3	---	0.044
Timm22	translocase of inner mitochondrial membrane 22 homolog (yeast)	0.044
Zbtb7c	zinc finger and BTB domain containing 7C	0.0441
Nrbf2	nuclear receptor binding factor 2	0.0441
Hdac3	histone deacetylase 3	0.0441
Eef2	eukaryotic translation elongation factor 2	0.0441
Elf1	E74-like factor 1	0.0443
Idh3b	isocitrate dehydrogenase 3 (NAD+) beta	0.0443
Mapkap1	mitogen-activated protein kinase associated protein 1	0.0443
Crtap	cartilage associated protein	0.0445
Ddx3x	DEAD/H (Asp-Glu-Ala-Asp/His) box polypeptide 3, X-linked	0.0445
Mbd6	methyl-CpG binding domain protein 6	0.0445
rp9	retinitis pigmentosa 9 (human)	0.0446
Aars	alanyl-tRNA synthetase	0.0447
Jph2	junctophilin 2	0.0447
Ly6g6c	lymphocyte antigen 6 complex, locus G6C	0.0447
Rfx2	regulatory factor X, 2 (influences HLA class II expression)	0.0447
Sufu	suppressor of fused homolog (Drosophila)	0.0447
Zfp36l2	zinc finger protein 36, C3H type-like 2	0.0449
Terf1	telomeric repeat binding factor 1	0.0449
Kcnj1	potassium inwardly-rectifying channel, subfamily J, member 1	0.0449
Efhd1	EF hand domain containing 1	0.0449
Arhgap1	Rho GTPase activating protein 1	0.0449
Morf4l1	mortality factor 4 like 1	0.045
Tor1a	torsin family 1, member A (torsin A)	0.0451
Phf19	PHD finger protein 19	0.0451
Nav2	neuron navigator 2	0.0451
Map2k7	mitogen-activated protein kinase kinase 7	0.0451
Agpat4	1-acylglycerol-3-phosphate O-acyltransferase 4 (lysophosphatidic acid acyltransferase, delta)	0.0451
Cd97	CD97 antigen	0.0452
Rps6ka6	ribosomal protein S6 kinase polypeptide 6	0.0452
Ndrg3	N-myc downstream regulated gene 3	0.0453
Rhof	ras homolog gene family, member f	0.0453
Sdccag1	serologically defined colon cancer antigen 1	0.0456
Kctd3	potassium channel tetramerisation domain containing 3	0.0456
Spag7	sperm associated antigen 7	0.0457
Cyr61	cysteine rich protein 61	0.0459
Osbp2	oxysterol binding protein 2	0.046
Pink1	PTEN induced putative kinase 1	0.046
Uroc1	urocanase domain containing 1	0.0461
Nt5c	5',3'-nucleotidase, cytosolic	0.0461
Bcl11a	B-cell CLL/lymphoma 11A (zinc finger protein)	0.0461
Mcf2l	mcf.2 transforming sequence-like	0.0462
Hook3	hook homolog 3 (Drosophila)	0.0463
Coq3	coenzyme Q3 homolog, methyltransferase (yeast)	0.0464
Nanos3	nanos homolog 3 (Drosophila)	0.0464
Plxnd1	plexin D1	0.0464
Tmprss13	transmembrane protease, serine 13	0.0465
Tyk2	tyrosine kinase 2	0.0465
Masp1	mannan-binding lectin serine peptidase 1	0.0466
Csda	cold shock domain protein A	0.0466
Cend1	cell cycle exit and neuronal differentiation 1	0.0467
Jarid2	jumonji, AT rich interactive domain 2	0.0467
Rbm17	RNA binding motif protein 17	0.0467
Wdr42a	WD repeat domain 42A	0.0468
Pla2g2f	phospholipase A2, group IIF	0.0468
Notch3	Notch gene homolog 3 (Drosophila)	0.0468
Eif4a2	eukaryotic translation initiation factor 4A2	0.0468
Galnt2	UDP-N-acetyl-alpha-D-galactosamine:polypeptide N-acetylgalactosaminyltransferase 2	0.0469
Usp29	ubiquitin specific peptidase 29	0.0469
Tmem64	transmembrane protein 64	0.047
Dlx3	distal-less homeobox 3	0.047
Adam30	a disintegrin and metallopeptidase domain 30	0.047
Atrn	attractin	0.0471
Cog8	component of oligomeric golgi complex 8	0.0472
Rps24	ribosomal protein S24	0.0472
Son	Son DNA binding protein	0.0472
Cetn3	centrin 3	0.0474
Ergic2	ERGIC and golgi 2	0.0474
Slc35a1	solute carrier family 35 (CMP-sialic acid transporter), member 1	0.0474
U2af1	---	0.0474
Ipo13	importin 13	0.0475
Ghrh	growth hormone releasing hormone	0.0475
Fbxw9	F-box and WD-40 domain protein 9	0.0475
Cox7b2	cytochrome c oxidase subunit VIIb2	0.0475
Eps8l2	EPS8-like 2	0.0476
Tmub1	transmembrane and ubiquitin-like domain containing 1	0.0477
Zcchc9	zinc finger, CCHC domain containing 9	0.0478
Wasf1	WASP family 1	0.0478
Stk25	serine/threonine kinase 25 (yeast)	0.0478
Hist1h4h	histone cluster 1, H4h	0.0478
Kif20a	kinesin family member 20A	0.0479
Psen2	presenilin 2	0.048
Oplah	5-oxoprolinase (ATP-hydrolysing)	0.048
Sfrs9	splicing factor, arginine/serine rich 9	0.0481
Cdkn1b	cyclin-dependent kinase inhibitor 1B	0.0482
Rfwd2	ring finger and WD repeat domain 2	0.0483
Mcm8	minichromosome maintenance deficient 8 (S. cerevisiae)	0.0483
Ankrd17	ankyrin repeat domain 17	0.0483
Fahd1	fumarylacetoacetate hydrolase domain containing 1	0.0484
Otub2	OTU domain, ubiquitin aldehyde binding 2	0.0485
Gip	gastric inhibitory polypeptide	0.0485
Stxbp1	syntaxin binding protein 1	0.0486
Rab13	RAB13, member RAS oncogene family	0.0487
Bag5	BCL2-associated athanogene 5	0.0487
Tpr	translocated promoter region	0.0488
Tmem140	transmembrane protein 140	0.0488
Ddx1	DEAD (Asp-Glu-Ala-Asp) box polypeptide 1	0.0488
Aplp2	amyloid beta (A4) precursor-like protein 2	0.0488
Ltbp2	latent transforming growth factor beta binding protein 2	0.0489
Nupr1	nuclear protein 1	0.049
Cxadr	coxsackie virus and adenovirus receptor	0.0491
Ell	elongation factor RNA polymerase II	0.0491
Nmd3	NMD3 homolog (S. cerevisiae)	0.0491
Papola	poly (A) polymerase alpha	0.0493
Scube1	signal peptide, CUB domain, EGF-like 1	0.0493
Zyx	zyxin	0.0493
Ppm1g	protein phosphatase 1G (formerly 2C), magnesium-dependent, gamma isoform	0.0494
Rcor2	REST corepressor 2	0.0494
Whsc2	Wolf-Hirschhorn syndrome candidate 2 (human)	0.0495
Apex1	apurinic/apyrimidinic endonuclease 1	0.0495
Myog	myogenin	0.0496
Rwdd4a	RWD domain containing 4A	0.0496
Wnt9b	wingless-type MMTV integration site 9B	0.0496
Por	P450 (cytochrome) oxidoreductase	0.0497
Mbd1	methyl-CpG binding domain protein 1	0.0497
Gnb3	guanine nucleotide binding protein (G protein), beta 3	0.0497
Des	desmin	0.0497
Bik	BCL2-interacting killer	0.0497
Nap1l5	nucleosome assembly protein 1-like 5	0.0498
Igfbp5	insulin-like growth factor binding protein 5	0.0499
